# Supplementary material for: Acyl-lipid desaturases and Vipp1 cooperate in cyanobacteria to produce novel omega-3 PUFA-containing glycolipids
Source: Biotechnol Biofuels. 2020 May 6;13:83. doi: 10.1186/s13068-020-01719-7 (PMC7203895; doi:10.1186/s13068-020-01719-7)
Supplement: Supplementary file 3 — Additional file 3. Identification of glycoglycerolipids in lipid extracts of wild type and genetically-engineered cyanobacteria. [file 13068_2020_1719_MOESM3_ESM.xlsx]

## Sheet: Glycoglycerolipids
Supplementary file 3. Identification of glycoglycerolipids in lipid extracts of wild type and genetically-engineered cyanobacteria
SampleID	DataId	LipidIon	Class	FattyAcid	Ion	Formula	ObsMz	Rt	It.	It.(S)	It.(N)	Pol.	z	Scan	ObsMass	CalcMz	Delta(Da)	Delta(PPM)	m-Score	t-Score	Occupy	Cnt	Grade	ProductIon	TopRT	Area	AreaScore	PeakQuality	SN	QMethod	Height	Hwhm(L)	Hwhm(R)	QuantInfo
03_BL0902-1	2457	DGDG(14:0_16:0)+HCOO	DGDG	(14:0_16:0)	M+HCOO	C46 H85 O17	909.581	14.9326	175764	175764	175764	N	1	MS2	909.58	909.579	0.00171747	1.8882	33.3584	0.482474	55.5974	6	A	FA(14:0)-H(227.201583):MS2,FA(14:0)-H [isotope](228.204743):MS2,M-FA-FA2+H2O-GAL-H(235.082224):MS2,FA(16:0)-H(255.233092):MS2,M-FA1-FA2-H(379.123716):MS2,M-FA1-FA2+H2O-H(397.135304):MS2,M-FA1-FA2+2H2O-H(415.145281):MS2	14.953	1668000	1	0.96	216040	SI	225200	0	0	14.953_225168.205_14.756_15.141_1668127.470_0.96_216039.53_14.774_1.042_15.135_1.042
03_BL0902-1	2958	DGDG(16:0_16:0)+HCOO	DGDG	(16:0_16:0)	M+HCOO	C48 H89 O17	937.612	17.0004	5.22903e+06	5.22903e+06	5.22903e+06	N	1	MS2	937.611	937.611	0.00125047	1.33368	38.9557	0.775314	64.9261	6	A	M-FA-FA2+H2O-GAL-H(235.082191):MS2,FA(16:0)-H(255.233015):MS2,FA(16:0)-H [isotope](256.236478):MS2,M-FA1-FA2-H(379.124775):MS2,M-FA1-FA2+H2O-H(397.135305):MS2,M-FA1-FA2+H2O-H [isotope](398.138958):MS2,M-FA1-FA2+2H2O-H(415.146134):MS2	17.049	49150000	1	0.9	3210.64	SI	7735000	0	0	17.049_7735102.624_16.842_17.239_49148898.347_0.90_3210.64_16.845_2408.456_17.220_2408.456
03_BL0902-1	2515	DGDG(16:0_16:1)+HCOO	DGDG	(16:0_16:1)	M+HCOO	C48 H87 O17	935.596	15.1703	4.19089e+06	4.19089e+06	4.19089e+06	N	1	MS2	935.596	935.595	0.00158247	1.6914	38.9162	0.0344553	64.8603	6	A	M-FA-FA2+H2O-GAL-H(235.081894):MS2,FA(16:1)-H(253.217206):MS2,FA(16:1)-H [isotope](254.220585):MS2,FA(16:0)-H(255.232844):MS2,FA(16:0)-H [isotope](256.236183):MS2,M-FA1-FA2-H(379.124656):MS2,M-FA1-FA2-H [isotope](380.127422):MS2,M-FA1-FA2+H2O-H(397.134937):MS2,M-FA1-FA2+H2O-H [isotope](398.13875):MS2,M-FA1-FA2+2H2O-H(415.145844):MS2	15.166	33420000	1	0.95	14209.4	SI	4190000	0	0	15.166_4190410.991_14.944_15.406_33421915.810_0.95_14209.43_14.966_294.883_15.388_294.883
03_BL0902-1	2147	DGDG(16:0_16:2)+HCOO	DGDG	(16:0_16:2)	M+HCOO	C48 H85 O17	933.581	13.6756	539883	539883	539883	N	1	MS2	933.58	933.579	0.00133447	1.42941	37.5324	0.00100588	62.554	6	A	M-FA-FA2+H2O-GAL-H(235.082453):MS2,FA(16:2)-H(251.202032):MS2,FA(16:2)-H [isotope](252.205914):MS2,FA(16:0)-H(255.23319):MS2,FA(16:0)-H [isotope](256.236932):MS2,M-FA1-FA2-H(379.124772):MS2,M-FA1-FA2+H2O-H(397.135351):MS2,M-FA1-FA2+H2O-H [isotope](398.13821):MS2,M-FA1-FA2+2H2O-H(415.146273):MS2	13.69	4851000	1	0.84	76.8	SI	617600	0	0	13.315_345718.666_13.070_13.515_3608114.646_0.74_345717.67_13.070_0.000_13.515_0.000;13.690_617560.416_13.515_13.866_4851105.900_0.84_76.80_13.515_7938.125_13.853_7938.125
03_BL0902-1	3231	DGDG(16:0_17:0)+HCOO	DGDG	(16:0_17:0)	M+HCOO	C49 H91 O17	951.627	18.045	440523	440523	440523	N	1	MS2	951.627	951.626	0.00117147	1.23102	37.1507	0.269844	61.9179	6	A	M-FA-FA2+H2O-GAL-H(235.082272):MS2,FA(16:0)-H(255.233144):MS2,FA(16:0)-H [isotope](256.236119):MS2,FA(17:0)-H(269.248817):MS2,FA(17:0)-H [isotope](270.251989):MS2,M-FA1-FA2-H(379.12515):MS2,M-FA1-FA2+H2O-H(397.135082):MS2,M-FA1-FA2+H2O-H [isotope](398.138516):MS2,M-FA1-FA2+2H2O-H(415.146391):MS2	18.011	3186000	1	0.99	602135	SI	602100	0	0	18.011_602136.351_17.797_18.185_3186154.717_0.99_602135.35_17.852_0.000_18.179_0.000
03_BL0902-1	2768	DGDG(16:0_17:1)+HCOO	DGDG	(16:0_17:1)	M+HCOO	C49 H89 O17	949.612	16.2106	1.44214e+06	1.44214e+06	1.44214e+06	N	1	MS2	949.611	949.611	0.00116047	1.22205	38.0206	0.386774	63.3676	6	A	M-FA-FA2+H2O-GAL-H(235.082013):MS2,FA(16:0)-H(255.232837):MS2,FA(16:0)-H [isotope](256.236542):MS2,FA(17:1)-H(267.232966):MS2,FA(17:1)-H [isotope](268.236121):MS2,M-FA1-FA2-H(379.124609):MS2,M-FA1-FA2+H2O-H(397.135337):MS2,M-FA1-FA2+H2O-H [isotope](398.138975):MS2,M-FA1-FA2+2H2O-H(415.145884):MS2	16.206	9345000	1	1	1.43809e+06	SI	1438000	0	0	16.206_1438090.479_15.999_16.416_9344940.894_1.00_1438089.48_15.999_0.000_16.409_0.000
03_BL0902-1	2395	DGDG(16:0_17:2)+HCOO	DGDG	(16:0_17:2)	M+HCOO	C49 H87 O17	947.596	14.6804	1.18175e+06	1.18175e+06	1.18175e+06	N	1	MS2	947.595	947.595	0.00110847	1.16977	39.1575	0.277809	65.2624	6	A	M-FA-FA2+H2O-GAL-H(235.082264):MS2,FA(16:0)-H(255.233024):MS2,FA(16:0)-H [isotope](256.236028):MS2,FA(17:2)-H(265.217573):MS2,FA(17:2)-H [isotope](266.220852):MS2,M-FA1-FA2-H(379.125053):MS2,M-FA1-FA2+H2O-H(397.135322):MS2,M-FA1-FA2+H2O-H [isotope](398.138016):MS2,M-FA1-FA2+2H2O-H(415.145757):MS2	14.672	8662000	1	0.99	1.21055e+06	SI	1211000	0	0	14.672_1210550.575_14.474_14.873_8661891.697_0.99_1210549.57_14.474_0.000_14.867_0.000
03_BL0902-1	2102	DGDG(16:0_17:3)+HCOO	DGDG	(16:0_17:3)	M+HCOO	C49 H85 O17	945.58	13.4911	371210	371210	371210	N	1	MS2	945.579	945.579	0.00079947	0.845482	38.6228	0.267362	64.3713	6	A	M-FA-FA2+H2O-GAL-H(235.082424):MS2,FA(16:0)-H(255.233065):MS2,FA(16:0)-H [isotope](256.236266):MS2,FA(17:3)-H(263.202217):MS2,FA(17:3)-H [isotope](264.205536):MS2,M-FA1-FA2-H(379.126388):MS2,M-FA1-FA2+H2O-H(397.135552):MS2,M-FA1-FA2+H2O-H [isotope](398.13841):MS2,M-FA1-FA2+2H2O-H(415.147391):MS2	13.524	3744000	1	0.85	397178	SI	397200	0	0	13.524_397178.585_13.177_13.735_3744248.159_0.85_397177.58_13.177_0.000_13.725_0.000;13.142_7387.525_13.097_13.177_10863.695_0.51_7386.52_13.097_0.000_13.177_0.000
03_BL0902-1	3486	DGDG(16:0_18:0)+HCOO	DGDG	(16:0_18:0)	M+HCOO	C50 H93 O17	965.643	18.9822	1.65363e+06	1.65363e+06	1.65363e+06	N	1	MS2	965.642	965.642	0.00109547	1.13445	38.6697	0.984532	64.4495	6	A	M-FA-FA2+H2O-GAL-H(235.082244):MS2,FA(16:0)-H(255.232985):MS2,FA(16:0)-H [isotope](256.236525):MS2,FA(18:0)-H(283.264446):MS2,FA(18:0)-H [isotope](284.267866):MS2,M-FA1-FA2-H(379.124861):MS2,M-FA1-FA2+H2O-H(397.13541):MS2,M-FA1-FA2+H2O-H [isotope](398.13835):MS2,M-FA1-FA2+2H2O-H(415.145666):MS2	18.956	12720000	1	0.98	2.35403e+06	SI	2354000	0	0	18.956_2354027.913_18.757_19.208_12717396.335_0.98_2354026.91_18.800_0.000_19.201_0.000
03_BL0902-1	3004	DGDG(16:0_18:1)+HCOO	DGDG	(16:0_18:1)	M+HCOO	C50 H91 O17	963.627	17.1802	11013437	11013437	11013437	N	1	MS2	963.627	963.626	0.00119747	1.24267	39.2613	0.313393	65.4355	6	A	M-FA-FA2+H2O-GAL-H(235.081851):MS2,FA(16:0)-H(255.232916):MS2,FA(16:0)-H [isotope](256.23621):MS2,FA(18:1)-H(281.248654):MS2,FA(18:1)-H [isotope](282.252098):MS2,M-FA1-FA2-H(379.124975):MS2,M-FA1-FA2+H2O-H(397.135361):MS2,M-FA1-FA2+H2O-H [isotope](398.138845):MS2,M-FA1-FA2+2H2O-H(415.145933):MS2	17.191	100700000	1	0.96	999.07	SI	11360000	0	0	17.191_11363138.865_16.930_17.440_100739354.706_0.96_999.07_16.954_11362.363_17.432_11362.363
03_BL0902-1	2607	DGDG(16:0_18:2)+HCOO	DGDG	(16:0_18:2)	M+HCOO	C50 H89 O17	961.612	15.6074	20111296	20111296	20111296	N	1	MS2	961.611	961.611	0.00099147	1.03105	38.9049	0.336866	64.8416	6	A	M-FA-FA2+H2O-GAL-H(235.082316):MS2,FA(16:0)-H(255.232996):MS2,FA(16:0)-H [isotope](256.236426):MS2,FA(18:2)-H(279.233098):MS2,FA(18:2)-H [isotope](280.236489):MS2,M-FA1-FA2-H(379.124735):MS2,M-FA1-FA2+H2O-H(397.135205):MS2,M-FA1-FA2+H2O-H [isotope](398.138589):MS2,M-FA1-FA2+2H2O-H(415.145869):MS2	15.647	220500000	1	0.96	262.27	SI	32130000	0	0	15.647_32126476.507_15.279_15.816_220531659.305_0.96_262.27_15.305_122026.577_15.807_122026.577
03_BL0902-1	2609	DGDG(16:0_18:2)-H	DGDG	(16:0_18:2)	M-H	C49 H87 O15	915.605	15.612	303163	303163	303163	N	1	MS2	915.605	915.605	0.00042247	0.461411	37.0879	0.332247	61.8131	6	A	M-FA-FA2+H2O-GAL-H(235.082238):MS2,FA(16:0)-H(255.23312):MS2,FA(16:0)-H [isotope](256.236516):MS2,FA(18:2)-H(279.233217):MS2,FA(18:2)-H [isotope](280.236622):MS2,M-FA1-FA2-H(379.125046):MS2,M-FA1-FA2+H2O-H(397.135847):MS2,M-FA1-FA2+H2O-H [isotope](398.138675):MS2,M-FA1-FA2+2H2O-H(415.146113):MS2	15.647	2933000	1	0.99	449939	SI	449900	0	0	15.647_449939.802_15.447_15.805_2932941.293_0.99_449938.80_15.480_0.000_15.799_0.000
03_BL0902-1	2352	DGDG(16:0_18:3)+HCOO	DGDG	(16:0_18:3)	M+HCOO	C50 H87 O17	959.596	14.5125	24736804	24736804	24736804	N	1	MS2	959.595	959.595	0.00100747	1.04989	39.4692	0.0624229	65.7819	6	A	M-FA-FA2+H2O-GAL-H(235.08212):MS2,FA(16:0)-H(255.232966):MS2,FA(16:0)-H [isotope](256.236278):MS2,FA(18:3)-H(277.217456):MS2,FA(18:3)-H [isotope](278.220668):MS2,M-FA1-FA2-H(379.124951):MS2,M-FA1-FA2+H2O-H(397.135463):MS2,M-FA1-FA2+H2O-H [isotope](398.138522):MS2,M-FA1-FA2+2H2O-H(415.145422):MS2	14.5	209600000	0.95	0.95	656.68	BS	21990000	0.083	0.066	13.778_1823283.702_0.083_0.072_17977913.178_0.98_80.52_13.606_13.959;14.500_21993109.156_0.083_0.066_209553852.355_0.95_656.68_14.070_14.680
03_BL0902-1	2359	DGDG(16:0_18:3)-H	DGDG	(16:0_18:3)	M-H	C49 H85 O15	913.59	14.5461	250121	250121	250121	N	1	MS2	913.589	913.589	0.00037647	0.412078	37.9185	0.0960439	63.1976	6	A	M-FA-FA2+H2O-GAL-H(235.082162):MS2,FA(16:0)-H(255.233136):MS2,FA(16:0)-H [isotope](256.236314):MS2,FA(18:3)-H(277.217464):MS2,FA(18:3)-H [isotope](278.220853):MS2,M-FA1-FA2-H(379.12471):MS2,M-FA1-FA2+H2O-H(397.135307):MS2,M-FA1-FA2+H2O-H [isotope](398.138144):MS2,M-FA1-FA2+2H2O-H(415.146167):MS2	14.527	2638000	1	0.6	393547	SI	393500	0	0	14.527_393547.942_14.271_14.711_2637565.949_0.60_393546.94_14.313_0.000_14.676_0.000
03_BL0902-1	2019	DGDG(16:0_18:4)+HCOO	DGDG	(16:0_18:4)	M+HCOO	C50 H85 O17	957.581	13.0817	481951	481951	481951	N	1	MS2	957.58	957.579	0.00132447	1.38314	35.9953	0.28146	59.9922	6	A	M-FA-FA2+H2O-GAL-H(235.081986):MS2,FA(16:0)-H(255.233095):MS2,FA(16:0)-H [isotope](256.236491):MS2,FA(18:4)-H(275.20179):MS2,FA(18:4)-H [isotope](276.204951):MS2,M-FA1-FA2-H(379.124132):MS2,M-FA1-FA2+H2O-H(397.135242):MS2,M-FA1-FA2+2H2O-H(415.14487):MS2	13.1	5904000	0.93	0.87	21.97	BS	507700	0.095	0.087	13.100_507667.786_0.095_0.087_5903928.535_0.87_21.97_12.869_13.245;12.559_2870803.386_0.094_0.062_28617929.049_0.93_3344328.73_12.082_12.869
03_BL0902-1	3225	DGDG(16:0_19:1)+HCOO	DGDG	(16:0_19:1)	M+HCOO	C51 H93 O17	977.643	18.0173	243023	243023	243023	N	1	MS2	977.642	977.642	0.00101447	1.03767	40.2296	0.25796	67.0493	6	A	M-FA-FA2+H2O-GAL-H(235.082372):MS2,FA(16:0)-H(255.23303):MS2,FA(16:0)-H [isotope](256.236634):MS2,FA(19:1)-H(295.264352):MS2,FA(19:1)-H [isotope](296.267848):MS2,M-FA1-FA2-H(379.12644):MS2,M-FA1-FA2+H2O-H(397.135383):MS2,M-FA1-FA2+2H2O-H(415.145906):MS2	18.042	2320000	1	0.77	264400	SI	264400	0	0	18.042_264401.094_17.809_18.303_2319933.127_0.77_264400.09_17.879_0.000_18.291_0.000
03_BL0902-1	2843	DGDG(16:0_19:2)+HCOO	DGDG	(16:0_19:2)	M+HCOO	C51 H91 O17	975.627	16.519	207828	207828	207828	N	1	MS2	975.627	975.626	0.00121647	1.24686	36.8257	0.558662	61.3762	6	A	M-FA-FA2+H2O-GAL-H(235.082335):MS2,FA(16:0)-H(255.233092):MS2,FA(19:2)-H(293.249053):MS2,FA(19:2)-H [isotope](294.252287):MS2,M-FA1-FA2-H(379.125128):MS2,M-FA1-FA2+H2O-H(397.135231):MS2,M-FA1-FA2+2H2O-H(415.146914):MS2	16.543	3302000	1	0.94	386185	SI	386200	0	0	16.543_386185.943_16.280_16.856_3302489.493_0.94_386184.94_16.280_0.000_16.847_0.000
03_BL0902-1	3086	DGDG(16:0_20:2)+HCOO	DGDG	(16:0_20:2)	M+HCOO	C52 H93 O17	989.643	17.4681	414504	414504	414504	N	1	MS2	989.643	989.642	0.00127647	1.28983	36.2515	0.552487	60.4191	6	A	M-FA-FA2+H2O-GAL-H(235.082109):MS2,FA(16:0)-H(255.233046):MS2,FA(16:0)-H [isotope](256.236019):MS2,FA(20:2)-H(307.264107):MS2,FA(20:2)-H [isotope](308.267967):MS2,M-FA1-FA2-H(379.125874):MS2,M-FA1-FA2+H2O-H(397.135269):MS2,M-FA1-FA2+H2O-H [isotope](398.136998):MS2,M-FA1-FA2+2H2O-H(415.144929):MS2	17.412	4591000	1	0.99	597947	SI	597900	0	0	17.412_597948.424_17.125_17.593_4591243.539_0.99_597947.42_17.125_0.000_17.582_0.000
03_BL0902-1	2758	DGDG(16:0_20:3)+HCOO	DGDG	(16:0_20:3)	M+HCOO	C52 H91 O17	987.627	16.1739	950026	950026	950026	N	1	MS2	987.626	987.626	0.00085747	0.868213	40.7471	0.0512415	67.9118	6	A	M-FA-FA2+H2O-GAL-H(235.082062):MS2,FA(16:0)-H(255.232932):MS2,FA(16:0)-H [isotope](256.236151):MS2,FA(20:3)-H(305.248698):MS2,FA(20:3)-H [isotope](306.252245):MS2,M-FA1-FA2-H(379.124726):MS2,M-FA1-FA2+H2O-H(397.135055):MS2,M-FA1-FA2+H2O-H [isotope](398.138497):MS2,M-FA1-FA2+2H2O-H(415.14562):MS2	16.144	7143000	1	0.96	99.26	SI	1044000	0	0	16.144_1043878.438_16.012_16.322_7143353.579_0.96_99.26_16.019_10411.553_16.317_10411.553
03_BL0902-1	2063	DGDG(16:1_16:1)+HCOO	DGDG	(16:1_16:1)	M+HCOO	C48 H85 O17	933.581	13.3039	272933	272933	272933	N	1	MS2	933.58	933.579	0.00133647	1.43155	32.8946	0.370754	54.8243	6	A	M-FA-FA2+H2O-GAL-H(235.081774):MS2,FA(16:1)-H(253.217448):MS2,FA(16:1)-H [isotope](254.22134):MS2,M-FA1-FA2-H(379.124963):MS2,M-FA1-FA2+H2O-H(397.135368):MS2,M-FA1-FA2+2H2O-H(415.145816):MS2	13.315	3608000	1	0.74	345718	SI	345700	0	0	13.315_345718.666_13.070_13.515_3608114.646_0.74_345717.67_13.070_0.000_13.515_0.000;13.690_617560.416_13.515_13.866_4851105.900_0.84_76.80_13.515_7938.125_13.853_7938.125
03_BL0902-1	2570	DGDG(16:1_18:1)+HCOO	DGDG	(16:1_18:1)	M+HCOO	C50 H89 O17	961.611	15.427	238254	238254	238254	N	1	MS2	961.611	961.611	0.00080847	0.840746	36.0574	0.517181	60.0956	6	A	M-FA-FA2+H2O-GAL-H(235.082105):MS2,FA(16:1)-H(253.217601):MS2,FA(18:1)-H(281.249094):MS2,FA(18:1)-H [isotope](282.252545):MS2,M-FA1-FA2-H(379.125504):MS2,M-FA1-FA2+H2O-H(397.135622):MS2,M-FA1-FA2+2H2O-H(415.146513):MS2	15.647	220500000	1	0.96	262.27	SI	32130000	0	0	15.647_32126476.507_15.279_15.816_220531659.305_0.96_262.27_15.305_122026.577_15.807_122026.577
03_BL0902-1	2163	DGDG(16:1_18:2)+HCOO	DGDG	(16:1_18:2)	M+HCOO	C50 H87 O17	959.596	13.7504	1.52531e+06	1.52531e+06	1.52531e+06	N	1	MS2	959.595	959.595	0.00103547	1.07907	39.3973	0.699699	65.6621	6	A	M-FA-FA2+H2O-GAL-H(235.08205):MS2,FA(16:1)-H(253.217434):MS2,FA(16:1)-H [isotope](254.220722):MS2,FA(18:2)-H(279.233186):MS2,FA(18:2)-H [isotope](280.236438):MS2,M-FA1-FA2-H(379.125179):MS2,M-FA1-FA2+H2O-H(397.135387):MS2,M-FA1-FA2+H2O-H [isotope](398.138151):MS2,M-FA1-FA2+2H2O-H(415.145728):MS2	13.795	16200000	1	0.87	80.49	SI	2050000	0	0	13.795_2050304.372_13.606_13.939_16204116.501_0.87_80.49_13.606_25159.598_13.934_25159.598
03_BL0902-1	1910	DGDG(16:1_18:3)+HCOO	DGDG	(16:1_18:3)	M+HCOO	C50 H85 O17	957.581	12.5857	3.23131e+06	3.23131e+06	3.23131e+06	N	1	MS2	957.58	957.579	0.00138447	1.4458	39.7668	0.21454	66.2779	6	A	M-FA-FA2+H2O-GAL-H(235.08218):MS2,FA(16:1)-H(253.217366):MS2,FA(16:1)-H [isotope](254.220686):MS2,FA(18:3)-H(277.217366):MS2,FA(18:3)-H [isotope](278.22076):MS2,M-FA1-FA2-H(379.12495):MS2,M-FA1-FA2+H2O-H(397.135159):MS2,M-FA1-FA2+H2O-H [isotope](398.138187):MS2,M-FA1-FA2+2H2O-H(415.145927):MS2	12.576	30040000	1	0.93	414.08	SI	3429000	0	0	12.576_3428736.782_12.101_12.855_30038670.869_0.93_414.08_12.137_8260.438_12.843_8260.438
03_BL0902-1	3057	DGDG(18:1_18:1)+HCOO	DGDG	(18:1_18:1)	M+HCOO	C52 H93 O17	989.643	17.3773	346865	346865	346865	N	1	MS2	989.643	989.642	0.00128547	1.29892	27.9194	0.643257	46.5323	6	A	M-FA-FA2+H2O-GAL-H(235.082566):MS2,FA(18:1)-H(281.2491):MS2,FA(18:1)-H [isotope](282.252383):MS2,M-FA1-FA2-H(379.125445):MS2,M-FA1-FA2+H2O-H(397.135564):MS2,M-FA1-FA2+H2O-H [isotope](398.139063):MS2,M-FA1-FA2+2H2O-H(415.144589):MS2	17.412	4591000	1	0.99	597947	SI	597900	0	0	17.412_597948.424_17.125_17.593_4591243.539_0.99_597947.42_17.125_0.000_17.582_0.000
03_BL0902-1	2679	DGDG(18:1_18:2)+HCOO	DGDG	(18:1_18:2)	M+HCOO	C52 H91 O17	987.627	15.8806	338572	338572	338572	N	1	MS2	987.627	987.626	0.00105547	1.06869	39.3249	0.34447	65.5415	6	A	M-FA-FA2+H2O-GAL-H(235.082028):MS2,FA(18:2)-H(279.232912):MS2,FA(18:2)-H [isotope](280.237405):MS2,FA(18:1)-H(281.248688):MS2,FA(18:1)-H [isotope](282.252117):MS2,M-FA1-FA2-H(379.124693):MS2,M-FA1-FA2+H2O-H(397.1351):MS2,M-FA1-FA2+H2O-H [isotope](398.13686):MS2,M-FA1-FA2+2H2O-H(415.146369):MS2	15.848	3672000	1	0.71	502504	SI	502500	0	0	15.848_502504.775_15.666_15.997_3672293.785_0.71_502503.78_15.666_0.000_15.992_0.000
03_BL0902-1	2412	DGDG(18:1_18:3)+HCOO	DGDG	(18:1_18:3)	M+HCOO	C52 H89 O17	985.611	14.7403	187623	187623	187623	N	1	MS2	985.611	985.611	0.00085247	0.864915	28.8681	0.395567	57.7362	5	A	M-FA-FA2+H2O-GAL-H(235.082571):MS2,FA(18:3)-H(277.21736):MS2,FA(18:3)-H [isotope](278.220892):MS2,FA(18:1)-H(281.248598):MS2,FA(18:1)-H [isotope](282.252584):MS2,M-FA1-FA2+H2O-H(397.135687):MS2,M-FA1-FA2+2H2O-H(415.144862):MS2	14.774	2641000	0.86	0.96	227735	BS	201600	0.095	0.11	14.774_201610.311_0.095_0.110_2640797.287_0.96_227734.66_14.508_14.988;15.025_4085.318_0.025_0.025_13059.742_0.79_5677.31_14.988_15.091
03_BL0902-1	2294	DGDG(18:2_18:2)+HCOO	DGDG	(18:2_18:2)	M+HCOO	C52 H89 O17	985.611	14.2961	552252	552252	552252	N	1	MS2	985.611	985.611	0.00084947	0.861872	40.7587	0.83983	67.9312	6	A	M-FA-FA2+H2O-GAL-H(235.082046):MS2,FA(18:2)-H(279.233171):MS2,FA(18:2)-H [isotope](280.236187):MS2,M-FA1-FA2-H(379.125017):MS2,M-FA1-FA2+H2O-H(397.135278):MS2,M-FA1-FA2+H2O-H [isotope](398.137217):MS2,M-FA1-FA2+2H2O-H(415.145802):MS2	14.31	4664000	1	0.96	601629	SI	601600	0	0	14.310_601630.218_14.079_14.511_4664173.389_0.96_601629.22_14.079_0.000_14.470_0.000
03_BL0902-1	2023	DGDG(18:2_18:3)+HCOO	DGDG	(18:2_18:3)	M+HCOO	C52 H87 O17	983.596	13.1015	516929	516929	516929	N	1	MS2	983.595	983.595	0.00113647	1.15542	39.6969	0.573138	66.1616	6	A	M-FA-FA2+H2O-GAL-H(235.081963):MS2,FA(18:3)-H(277.21745):MS2,FA(18:3)-H [isotope](278.220602):MS2,FA(18:2)-H(279.23316):MS2,FA(18:2)-H [isotope](280.236688):MS2,M-FA1-FA2-H(379.125484):MS2,M-FA1-FA2+H2O-H(397.135336):MS2,M-FA1-FA2+H2O-H [isotope](398.139554):MS2,M-FA1-FA2+2H2O-H(415.147036):MS2	13.082	4992000	1	0.99	539434	SI	539400	0	0	13.082_539435.012_12.905_13.345_4991993.480_0.99_539434.01_12.905_0.000_13.304_0.000
03_BL0902-1	1798	DGDG(18:3_18:3)+HCOO	DGDG	(18:3_18:3)	M+HCOO	C52 H85 O17	981.58	11.8932	222216	222216	222216	N	1	MS2	981.58	981.579	0.00119747	1.21994	35.173	0.099731	58.6216	6	A	M-FA-FA2+H2O-GAL-H(235.082677):MS2,FA(18:3)-H(277.217589):MS2,FA(18:3)-H [isotope](278.221257):MS2,M-FA1-FA2-H(379.125723):MS2,M-FA1-FA2+H2O-H(397.134836):MS2,M-FA1-FA2+2H2O-H(415.146146):MS2	11.908	2050000	1	0.82	238866	SI	238900	0	0	11.908_238866.591_11.700_12.088_2049635.749_0.82_238865.59_11.706_0.000_12.058_0.000
03_BL0902-1	582	DGMG(16:0)+HCOO	DGMG	(16:0)	M+HCOO	C32 H59 O16	699.382	3.47952	550977	550977	550977	N	1	MS2	699.381	699.381	0.00077047	1.10165	13.1594	0.687543	32.8986	4	B	M-FA(16:0)-GAL-H(235.082266):MS2,FA(16:0)-H(255.232944):MS2,M-FA(16:0)-H(397.135668):MS2,M-FA(16:0)+H2O-H(415.14616):MS2	3.447	7235000	1	0.83	598815	SI	598800	0	0	3.447_598816.110_3.165_3.628_7235198.593_0.83_598815.11_3.165_0.000_3.628_0.000;3.704_227803.556_3.628_3.909_1643890.187_0.70_1578.83_3.628_144.195_3.892_144.195
03_BL0902-1	2460	MGDG(14:0_18:2)+HCOO	MGDG	(14:0_18:2)	M+HCOO	C42 H75 O12	771.527	14.9427	430437	430437	430437	N	1	MS2	771.527	771.526	0.00109547	1.41987	10.7339	0.1681	53.6694	2	B	FA(14:0)-H(227.201605):MS2,FA(18:2)-H(279.233767):MS2	14.926	4105000	0.93	0.79	2.14	BS	415200	0.079	0.076	14.733_497232.271_0.077_0.072_4735133.283_0.98_547084.04_14.534_14.823;14.926_415206.470_0.079_0.076_4105239.330_0.79_2.14_14.823_15.004;15.119_1403025.496_0.051_0.068_10661030.682_0.98_19.55_15.004_15.288
03_BL0902-1	2134	MGDG(14:0_18:3)+HCOO	MGDG	(14:0_18:3)	M+HCOO	C42 H73 O12	769.512	13.6289	240235	240235	240235	N	1	MS2	769.511	769.511	0.00114847	1.49247	7.37307	0.576207	36.8654	2	B	FA(14:0)-H(227.202036):MS2,FA(18:3)-H(277.217485):MS2	13.672	2599000	1	0.92	296951	SI	297000	0	0	13.672_296952.428_13.472_13.888_2598719.970_0.92_296951.43_13.472_0.000_13.862_0.000
03_BL0902-1	3311	MGDG(16:0_16:0)+HCOO	MGDG	(16:0_16:0)	M+HCOO	C42 H79 O12	775.559	18.3914	8516543	8516543	8516543	N	1	MS2	775.558	775.558	0.00110547	1.42539	39.586	0.713343	98.965	4	A	M-FA1-FA2+H2O-H(235.082203):MS2,M-FA1-FA2+2H2O-H(253.092637):MS2,FA(16:0)-H(255.233125):MS2,FA(16:0)-H [isotope](256.236516):MS2	18.388	57240000	1	0.99	591.91	SI	8453000	0	0	18.388_8452710.969_18.142_18.732_57244214.270_0.99_591.91_18.170_14256.398_18.695_14256.398
03_BL0902-1	2859	MGDG(16:0_16:1)+HCOO	MGDG	(16:0_16:1)	M+HCOO	C42 H77 O12	773.543	16.578	12149128	12149128	12149128	N	1	MS2	773.542	773.542	0.00068447	0.884852	38.2881	0.606997	95.7202	4	A	M-FA1-FA2+H2O-H(235.082722):MS2,M-FA1-FA2+2H2O-H(253.092989):MS2,FA(16:1)-H(253.217635):MS2,FA(16:1)-H [isotope](254.220443):MS2,FA(16:0)-H(255.233137):MS2,FA(16:0)-H [isotope](256.237204):MS2	16.599	120000000	1	0.94	681.09	SI	18050000	0	0	16.599_18050186.932_16.394_16.827_119954592.644_0.94_681.09_16.415_26462.898_16.820_26462.898
03_BL0902-1	2505	MGDG(16:0_16:2)+HCOO	MGDG	(16:0_16:2)	M+HCOO	C42 H75 O12	771.527	15.1379	1357587	1357587	1357587	N	1	MS2	771.527	771.526	0.00086347	1.11917	24.9602	0.363335	83.2007	3	A	FA(16:2)-H(251.201428):MS2,FA(16:2)-H [isotope](252.204874):MS2,M-FA1-FA2+2H2O-H(253.093069):MS2,FA(16:0)-H(255.232975):MS2	15.119	10660000	0.93	0.98	19.55	BS	1403000	0.051	0.068	14.733_497232.271_0.077_0.072_4735133.283_0.98_547084.04_14.534_14.823;14.926_415206.470_0.079_0.076_4105239.330_0.79_2.14_14.823_15.004;15.119_1403025.496_0.051_0.068_10661030.682_0.98_19.55_15.004_15.288
03_BL0902-1	3583	MGDG(16:0_17:0)+HCOO	MGDG	(16:0_17:0)	M+HCOO	C43 H81 O12	789.574	19.3262	376088	376088	376088	N	1	MS2	789.573	789.573	0.00032947	0.417276	17.799	1.21275	59.3301	3	A	M-FA1-FA2+2H2O-H(253.093028):MS2,FA(16:0)-H(255.232991):MS2,FA(17:0)-H(269.248591):MS2	19.326	1791000	1	0.82	463587	SI	463600	0	0	19.326_463587.935_19.204_19.408_1790614.508_0.82_463586.94_19.241_0.000_19.408_0.000;19.465_281945.320_19.408_19.603_1142548.414_0.68_4002.48_19.408_70.425_19.559_70.425
03_BL0902-1	3119	MGDG(16:0_17:1)+HCOO	MGDG	(16:0_17:1)	M+HCOO	C43 H79 O12	787.559	17.5779	4.86598e+06	4.86598e+06	4.86598e+06	N	1	MS2	787.558	787.558	0.00118447	1.50398	38.7445	0.223532	96.8614	4	A	M-FA1-FA2+H2O-H(235.081911):MS2,M-FA1-FA2+2H2O-H(253.092739):MS2,FA(16:0)-H(255.233216):MS2,FA(16:0)-H [isotope](256.236659):MS2,FA(17:1)-H(267.233389):MS2,FA(17:1)-H [isotope](268.236684):MS2	17.595	35790000	1	0.97	5.67194e+06	SI	5672000	0	0	17.595_5671943.030_17.402_17.811_35788742.395_0.97_5671942.03_17.402_0.000_17.805_0.000
03_BL0902-1	2736	MGDG(16:0_17:2)+HCOO	MGDG	(16:0_17:2)	M+HCOO	C43 H77 O12	785.543	16.0997	2.66098e+06	2.66098e+06	2.66098e+06	N	1	MS2	785.543	785.542	0.00138747	1.76626	37.6345	0.467601	94.0863	4	A	M-FA1-FA2+H2O-H(235.082597):MS2,M-FA1-FA2+2H2O-H(253.092884):MS2,FA(16:0)-H(255.233365):MS2,FA(16:0)-H [isotope](256.236437):MS2,FA(17:2)-H(265.21776):MS2,FA(17:2)-H [isotope](266.22129):MS2	16.111	20310000	1	0.97	104163	SI	2936000	0	0	16.111_2935655.814_15.886_16.276_20307447.485_0.97_104162.98_15.905_28.183_16.270_28.183
03_BL0902-1	2459	MGDG(16:0_17:3)+HCOO	MGDG	(16:0_17:3)	M+HCOO	C43 H75 O12	783.527	14.9404	1.12022e+06	1.12022e+06	1.12022e+06	N	1	MS2	783.527	783.526	0.00108147	1.38026	22.5808	0.683137	75.2692	3	A	M-FA1-FA2+2H2O-H(253.09286):MS2,FA(16:0)-H(255.233045):MS2,FA(16:0)-H [isotope](256.236655):MS2,FA(17:3)-H(263.201693):MS2,FA(17:3)-H [isotope](264.205287):MS2	14.944	9489000	1	0.97	1.34212e+06	SI	1342000	0	0	14.944_1342124.330_14.560_15.161_9489034.681_0.97_1342123.33_14.589_0.000_15.152_0.000
03_BL0902-1	3826	MGDG(16:0_18:0)+HCOO	MGDG	(16:0_18:0)	M+HCOO	C44 H83 O12	803.59	20.2617	1.0997e+06	1.0997e+06	1.0997e+06	N	1	MS2	803.59	803.589	0.00131947	1.64197	23	2.10172	76.6668	3	A	M-FA1-FA2+2H2O-H(253.092957):MS2,FA(16:0)-H(255.233017):MS2,FA(16:0)-H [isotope](256.236437):MS2,FA(18:0)-H(283.264621):MS2,FA(18:0)-H [isotope](284.267803):MS2	20.226	9841000	0.85	0.84	104607	BS	1360000	0.068	0.046	20.226_1360395.901_0.068_0.046_9841238.688_0.84_104606.62_20.073_20.286;20.336_1299874.737_0.044_0.059_8552785.328_0.86_1596029.90_20.286_20.496
03_BL0902-1	3348	MGDG(16:0_18:1)+HCOO	MGDG	(16:0_18:1)	M+HCOO	C44 H81 O12	801.574	18.5192	36442304	36442304	36442304	N	1	MS2	801.574	801.573	0.00108247	1.35043	38.71	0.346334	96.7751	4	A	M-FA1-FA2+H2O-H(235.082199):MS2,M-FA1-FA2+2H2O-H(253.092924):MS2,FA(16:0)-H(255.233278):MS2,FA(16:0)-H [isotope](256.23629):MS2,FA(18:1)-H(281.248977):MS2,FA(18:1)-H [isotope](282.251933):MS2	18.539	320000000	1	0.97	1808.12	SI	36920000	0	0	18.539_36921591.210_18.297_18.778_319965306.276_0.97_1808.12_18.297_20408.582_18.771_20408.582
03_BL0902-1	2969	MGDG(16:0_18:2)+HCOO	MGDG	(16:0_18:2)	M+HCOO	C44 H79 O12	799.558	17.0551	82721464	82721464	82721464	N	1	MS2	799.558	799.558	0.00053647	0.670958	37.4292	0.216269	93.5731	4	A	M-FA1-FA2+H2O-H(235.081352):MS2,M-FA1-FA2+2H2O-H(253.092735):MS2,FA(16:0)-H(255.233097):MS2,FA(16:0)-H [isotope](256.23662):MS2,FA(18:2)-H(279.233099):MS2,FA(18:2)-H [isotope](280.236733):MS2	17.048	555700000	1	0.98	681.02	SI	83200000	0	0	17.048_83203166.189_16.637_17.238_555666700.438_0.98_681.02_16.666_121995.521_17.228_121995.521
03_BL0902-1	2962	MGDG(16:0_18:2)-H	MGDG	(16:0_18:2)	M-H	C43 H77 O10	753.553	17.0186	176985	176985	176985	N	1	MS2	753.552	753.552	0.00075847	1.00653	29.6765	0.17974	98.9217	3	A	M-FA1-FA2+2H2O-H(253.092909):MS2,FA(16:0)-H(255.233215):MS2,FA(16:0)-H [isotope](256.236641):MS2,FA(18:2)-H(279.233225):MS2,FA(18:2)-H [isotope](280.236411):MS2	17.018	843800	0.82	0.88	32578.7	BS	202800	0.032	0.033	17.018_202802.139_0.032_0.033_843846.701_0.88_32578.72_16.882_17.163;16.843_1137.203_0.012_0.012_1774.013_0.99_4154.18_16.810_16.882
03_BL0902-1	2687	MGDG(16:0_18:3)+HCOO	MGDG	(16:0_18:3)	M+HCOO	C44 H77 O12	797.543	15.9125	60453032	60453032	60453032	N	1	MS2	797.543	797.542	0.00111647	1.39989	34.7847	0.660006	86.9617	4	A	M-FA1-FA2+H2O-H(235.082647):MS2,M-FA1-FA2+2H2O-H(253.092819):MS2,FA(16:0)-H(255.233036):MS2,FA(16:0)-H [isotope](256.237035):MS2,FA(18:3)-H(277.217403):MS2,FA(18:3)-H [isotope](278.220622):MS2	15.916	502000000	1	0.97	317.81	SI	73440000	0	0	15.916_73442055.340_15.560_16.140_501952229.489_0.97_317.81_15.587_230361.665_16.131_230361.665
03_BL0902-1	2680	MGDG(16:0_18:3)-H	MGDG	(16:0_18:3)	M-H	C43 H75 O10	751.537	15.8829	175723	175723	175723	N	1	MS2	751.536	751.537	0.00037047	0.49295	28.456	0.630371	94.8532	3	A	M-FA1-FA2+2H2O-H(253.092823):MS2,FA(16:0)-H(255.233081):MS2,FA(16:0)-H [isotope](256.236612):MS2,FA(18:3)-H(277.217386):MS2,FA(18:3)-H [isotope](278.221335):MS2	15.917	1296000	1	0.79	346463	SI	346500	0	0	15.917_346464.126_15.690_16.084_1295942.826_0.79_346463.13_15.746_0.022_16.059_0.022
03_BL0902-1	2355	MGDG(16:0_18:4)+HCOO	MGDG	(16:0_18:4)	M+HCOO	C44 H75 O12	795.528	14.53	874219	874219	874219	N	1	MS2	795.527	795.526	0.00116547	1.46503	20.3219	0.618191	67.7398	3	A	M-FA1-FA2+2H2O-H(253.092349):MS2,FA(16:0)-H(255.233048):MS2,FA(16:0)-H [isotope](256.235651):MS2,FA(18:4)-H(275.201626):MS2	14.536	7007000	0.94	0.99	23.85	BS	728700	0.074	0.077	14.536_728724.048_0.074_0.077_7006894.022_0.99_23.85_14.376_14.671;13.988_3633501.179_0.095_0.062_36383757.078_0.96_307.58_13.616_14.367
03_BL0902-1	3604	MGDG(16:0_19:1)+HCOO	MGDG	(16:0_19:1)	M+HCOO	C45 H83 O12	815.59	19.3896	462881	462881	462881	N	1	MS2	815.59	815.589	0.00133647	1.63865	16.3362	1.31542	54.4541	3	A	M-FA1-FA2+2H2O-H(253.093195):MS2,FA(16:0)-H(255.232514):MS2,FA(19:1)-H(295.264376):MS2,FA(19:1)-H [isotope](296.266759):MS2	19.441	5130000	0.9	0.85	29.17	BS	811700	0.047	0.052	19.334_596253.247_0.038_0.035_2768806.431_0.90_658973.18_19.227_19.368;19.441_811680.039_0.047_0.052_5130084.929_0.85_29.17_19.368_19.573
03_BL0902-1	3209	MGDG(16:0_19:2)+HCOO	MGDG	(16:0_19:2)	M+HCOO	C45 H81 O12	813.575	17.945	1.07948e+06	1.07948e+06	1.07948e+06	N	1	MS2	813.574	813.573	0.00151047	1.85659	29.1122	0.0275902	72.7806	4	A	M-FA1-FA2+H2O-H(235.081857):MS2,M-FA1-FA2+2H2O-H(253.092512):MS2,FA(16:0)-H(255.233176):MS2,FA(16:0)-H [isotope](256.237268):MS2,FA(19:2)-H(293.248725):MS2,FA(19:2)-H [isotope](294.252248):MS2	17.923	7673000	0.89	0.98	1.17657e+06	BS	1109000	0.052	0.056	17.923_1109103.851_0.052_0.056_7673083.971_0.98_1176571.03_17.799_18.255;17.746_110952.950_0.089_0.082_1209275.858_0.72_125108.34_17.568_17.799
03_BL0902-1	2864	MGDG(16:0_19:3)+HCOO	MGDG	(16:0_19:3)	M+HCOO	C45 H79 O12	811.559	16.5933	204063	204063	204063	N	1	MS2	811.558	811.558	0.00120447	1.48414	8.5213	0.562882	42.6065	2	B	FA(16:0)-H(255.23323):MS2,FA(19:3)-H(291.233191):MS2	16.643	2043000	1	0.71	293402	SI	293400	0	0	16.643_293402.918_16.429_16.807_2043273.504_0.71_293401.92_16.429_0.000_16.801_0.000
03_BL0902-1	3413	MGDG(16:0_20:2)+HCOO	MGDG	(16:0_20:2)	M+HCOO	C46 H83 O12	827.591	18.7414	597823	597823	597823	N	1	MS2	827.59	827.589	0.00155947	1.88435	14.7273	0.752519	49.091	3	A	M-FA1-FA2+2H2O-H(253.092515):MS2,FA(16:0)-H(255.232888):MS2,FA(16:0)-H [isotope](256.236458):MS2,FA(20:2)-H(307.264539):MS2	18.77	6579000	0.95	0.41	896344	BS	802200	0.068	0.06	18.770_802249.528_0.068_0.060_6579424.867_0.41_896343.52_18.411_18.919;19.012_122792.425_0.066_0.070_1061994.769_0.94_139671.60_18.919_19.185
03_BL0902-1	3101	MGDG(16:0_20:3)+HCOO	MGDG	(16:0_20:3)	M+HCOO	C46 H81 O12	825.575	17.5201	2752636	2752636	2752636	N	1	MS2	825.574	825.573	0.00120847	1.46379	28.8656	0.157899	96.2186	3	A	M-FA1-FA2+2H2O-H(253.09308):MS2,FA(16:0)-H(255.233367):MS2,FA(16:0)-H [isotope](256.236663):MS2,FA(20:3)-H(305.249098):MS2,FA(20:3)-H [isotope](306.252461):MS2	17.518	17060000	1	0.99	141.39	SI	2761000	0	0	17.518_2760637.983_17.347_17.742_17062090.811_0.99_141.39_17.347_19387.280_17.736_19387.280
03_BL0902-1	2394	MGDG(16:1_16:1)+HCOO	MGDG	(16:1_16:1)	M+HCOO	C42 H75 O12	771.527	14.6747	294432	294432	294432	N	1	MS2	771.527	771.526	0.00105047	1.36155	36.2822	0.0999139	90.7056	4	A	M-FA1-FA2+H2O-H(235.082356):MS2,M-FA1-FA2+2H2O-H(253.093388):MS2,FA(16:1)-H(253.217704):MS2,FA(16:1)-H [isotope](254.220703):MS2	14.733	4735000	0.93	0.98	547084	BS	497200	0.077	0.072	14.733_497232.271_0.077_0.072_4735133.283_0.98_547084.04_14.534_14.823;14.926_415206.470_0.079_0.076_4105239.330_0.79_2.14_14.823_15.004;15.119_1403025.496_0.051_0.068_10661030.682_0.98_19.55_15.004_15.288
03_BL0902-1	2911	MGDG(16:1_18:1)+HCOO	MGDG	(16:1_18:1)	M+HCOO	C44 H79 O12	799.559	16.7824	782659	782659	782659	N	1	MS2	799.559	799.558	0.00162347	2.03046	24.8025	0.0564964	82.6748	3	A	M-FA1-FA2+2H2O-H(253.092455):MS2,FA(16:1)-H(253.217279):MS2,FA(16:1)-H [isotope](254.220184):MS2,FA(18:1)-H(281.248887):MS2,FA(18:1)-H [isotope](282.250547):MS2	17.048	555700000	1	0.98	681.02	SI	83200000	0	0	17.048_83203166.189_16.637_17.238_555666700.438_0.98_681.02_16.666_121995.521_17.228_121995.521
03_BL0902-1	2516	MGDG(16:1_18:2)+HCOO	MGDG	(16:1_18:2)	M+HCOO	C44 H77 O12	797.543	15.1726	2.3346e+06	2.3346e+06	2.3346e+06	N	1	MS2	797.542	797.542	0.00088147	1.10523	26.4149	0.0799025	88.0495	3	A	M-FA1-FA2+2H2O-H(253.092802):MS2,FA(16:1)-H(253.217339):MS2,FA(16:1)-H [isotope](254.22092):MS2,FA(18:2)-H(279.233097):MS2,FA(18:2)-H [isotope](280.236597):MS2	15.165	17140000	1	0.97	95.63	SI	2335000	0	0	15.165_2334821.891_15.018_15.310_17138855.754_0.97_95.63_15.018_24163.467_15.305_24163.467
03_BL0902-1	2230	MGDG(16:1_18:3)+HCOO	MGDG	(16:1_18:3)	M+HCOO	C44 H75 O12	795.528	14.0301	2.9665e+06	2.9665e+06	2.9665e+06	N	1	MS2	795.527	795.526	0.00130747	1.64353	36.2678	0.118236	90.6694	4	A	M-FA1-FA2+H2O-H(235.082126):MS2,M-FA1-FA2+2H2O-H(253.093226):MS2,FA(16:1)-H(253.21767):MS2,FA(16:1)-H [isotope](254.22071):MS2,FA(18:3)-H(277.21767):MS2,FA(18:3)-H [isotope](278.221179):MS2	14.008	35960000	1	0.93	247.51	SI	4155000	0	0	14.008_4154827.655_13.567_14.276_35964476.656_0.93_247.51_13.600_16718.860_14.265_16718.860
03_BL0902-1	3228	MGDG(17:0_18:2)+HCOO	MGDG	(17:0_18:2)	M+HCOO	C45 H81 O12	813.575	18.0312	277305	277305	277305	N	1	MS2	813.574	813.573	0.00145447	1.78775	6.54347	0.113766	32.7173	2	B	FA(17:0)-H(269.248629):MS2,FA(18:2)-H(279.232889):MS2	17.923	7673000	0.89	0.98	1.17657e+06	BS	1109000	0.052	0.056	17.923_1109103.851_0.052_0.056_7673083.971_0.98_1176571.03_17.799_18.255;17.746_110952.950_0.089_0.082_1209275.858_0.72_125108.34_17.568_17.799
03_BL0902-1	3844	MGDG(18:0_18:1)+HCOO	MGDG	(18:0_18:1)	M+HCOO	C46 H85 O12	829.606	20.3286	205150	205150	205150	N	1	MS2	829.605	829.605	0.00116947	1.40967	7.24815	1.99545	36.2407	2	B	FA(18:1)-H(281.248853):MS2,FA(18:0)-H(283.264057):MS2	20.328	1319000	0.92	0.91	215053	BS	191900	0.056	0.051	20.328_191917.648_0.056_0.051_1318886.705_0.91_215053.47_20.233_20.533;20.190_87676.615_0.085_0.059_805483.486_0.63_100300.45_20.040_20.233
03_BL0902-1	3385	MGDG(18:1_18:1)+HCOO	MGDG	(18:1_18:1)	M+HCOO	C46 H83 O12	827.59	18.6481	596498	596498	596498	N	1	MS2	827.59	827.589	0.00144047	1.74056	23.2083	0.659196	77.361	3	A	M-FA1-FA2+2H2O-H(253.092796):MS2,FA(18:1)-H(281.24868):MS2,FA(18:1)-H [isotope](282.252435):MS2	18.77	6579000	0.95	0.41	896344	BS	802200	0.068	0.06	18.770_802249.528_0.068_0.060_6579424.867_0.41_896343.52_18.411_18.919;19.012_122792.425_0.066_0.070_1061994.769_0.94_139671.60_18.919_19.185
03_BL0902-1	3008	MGDG(18:1_18:2)+HCOO	MGDG	(18:1_18:2)	M+HCOO	C46 H81 O12	825.575	17.1969	910557	910557	910557	N	1	MS2	825.574	825.573	0.00117247	1.42019	23.6668	0.481097	78.8893	3	A	M-FA1-FA2+2H2O-H(253.093508):MS2,FA(18:2)-H(279.233067):MS2,FA(18:2)-H [isotope](280.236769):MS2,FA(18:1)-H(281.248743):MS2,FA(18:1)-H [isotope](282.252312):MS2	17.226	8447000	1	0.85	22205.5	SI	1040000	0	0	17.226_1039896.354_16.982_17.334_8446838.070_0.85_22205.52_17.016_46.828_17.329_46.828
03_BL0902-1	2737	MGDG(18:1_18:3)+HCOO	MGDG	(18:1_18:3)	M+HCOO	C46 H79 O12	823.559	16.1019	616129	616129	616129	N	1	MS2	823.559	823.558	0.00158547	1.92515	23.5029	0.130904	78.343	3	A	M-FA1-FA2+2H2O-H(253.092226):MS2,FA(18:3)-H(277.217433):MS2,FA(18:3)-H [isotope](278.221736):MS2,FA(18:1)-H(281.248612):MS2	16.136	8045000	1	0.99	798631	SI	798600	0	0	16.136_798632.213_15.908_16.374_8045046.664_0.99_798631.21_15.908_0.000_16.356_0.000
03_BL0902-1	2623	MGDG(18:2_18:2)+HCOO	MGDG	(18:2_18:2)	M+HCOO	C46 H79 O12	823.559	15.6867	754258	754258	754258	N	1	MS2	823.559	823.558	0.00145347	1.76487	23.2856	0.284384	77.6188	3	A	M-FA1-FA2+2H2O-H(253.093259):MS2,FA(18:2)-H(279.23316):MS2,FA(18:2)-H [isotope](280.2363):MS2	15.668	5802000	1	0.99	91503.2	SI	852900	0	0	15.668_852857.231_15.462_15.871_5802409.672_0.99_91503.21_15.501_9.320_15.822_9.320
03_BL0902-1	2343	MGDG(18:2_18:3)+HCOO	MGDG	(18:2_18:3)	M+HCOO	C46 H77 O12	821.543	14.4783	840778	840778	840778	N	1	MS2	821.542	821.542	0.00091847	1.11798	23.9454	0.29629	79.818	3	A	M-FA1-FA2+2H2O-H(253.092984):MS2,FA(18:3)-H(277.217502):MS2,FA(18:3)-H [isotope](278.221251):MS2,FA(18:2)-H(279.233213):MS2,FA(18:2)-H [isotope](280.237063):MS2	14.479	7658000	1	0.86	498.74	SI	902300	0	0	14.479_902275.773_14.271_14.711_7657789.195_0.86_498.74_14.299_1805.500_14.704_1805.500
03_BL0902-1	2053	MGDG(18:3_18:3)+HCOO	MGDG	(18:3_18:3)	M+HCOO	C46 H75 O12	819.528	13.2622	620644	620644	620644	N	1	MS2	819.528	819.526	0.00166247	2.02857	22.2068	0.209464	74.0228	3	A	M-FA1-FA2+2H2O-H(253.093296):MS2,FA(18:3)-H(277.217323):MS2,FA(18:3)-H [isotope](278.221245):MS2	13.277	5381000	1	0.83	170.33	SI	693400	0	0	13.277_693400.005_13.091_13.414_5381028.406_0.83_170.33_13.091_4047.193_13.409_4047.193
03_BL0902-1	663	MGMG(16:0)+HCOO	MGMG	(16:0)	M+HCOO	C26 H49 O11	537.328	4.06261	1.49028e+06	1.49028e+06	1.49028e+06	N	1	MS2	537.328	537.328	0.00031047	0.577804	24.2226	0.484841	80.7421	3	B	M-FA(16:0)-H(235.081936):MS2,M-FA(16:0)+H2O-H(253.093111):MS2,FA(16:0)-H(255.23327):MS2	4.125	32180000	1	0.75	243.89	SI	2368000	0	0	4.125_2368068.030_3.813_4.311_32179299.132_0.75_243.89_3.813_9670.115_4.311_9670.115;4.401_751941.430_4.311_4.592_5707805.288_0.61_33.91_4.311_21539.771_4.556_21539.771
03_BL0902-1	3551	SQDG(17:5_23:2)+HCOO	SQDG	(17:5_23:2)	M+HCOO	C50 H81 O14 S1	937.535	19.2269	84429416	84429416	84429416	N	1	MS2	937.534	937.535	-0.00071653	-0.764271	8.77366	3.25584	43.8683	2	B	SQMG(17:5)-H2O-H(541.208879):MS2,SQMG(17:5)-H2O-H [isotope](542.211899):MS2,M-H(891.526153):MS2,M-H [isotope](892.528176):MS2,M+HCOO(937.531415):MS2	19.267	754500000	1	0.99	4381.39	SI	103200000	0	0	19.267_103162664.016_19.064_19.663_754509085.328_0.99_4381.39_19.092_23540.248_19.540_23540.248
04_BL0902-1	1616	DGDG(14:0_18:3)+HCOO	DGDG	(14:0_18:3)	M+HCOO	C48 H83 O17	931.565	12.2031	292598	292598	292598	N	1	MS2	931.564	931.564	0.00136247	1.46256	35.8816	0.174145	59.8027	6	A	FA(14:0)-H(227.201416):MS2,FA(14:0)-H [isotope](228.205327):MS2,M-FA-FA2+H2O-GAL-H(235.082281):MS2,FA(18:3)-H(277.217518):MS2,FA(18:3)-H [isotope](278.221279):MS2,M-FA1-FA2-H(379.12418):MS2,M-FA1-FA2+H2O-H(397.135185):MS2,M-FA1-FA2+2H2O-H(415.145016):MS2	12.22	2896000	1	0.73	55.53	SI	310600	0	0	12.220_310619.824_11.990_12.333_2896405.124_0.73_55.53_11.990_5494.328_12.333_5494.328;12.396_75477.348_12.333_12.612_710139.027_0.62_75476.35_12.333_0.000_12.602_0.000
04_BL0902-1	2754	DGDG(16:0_16:0)+HCOO	DGDG	(16:0_16:0)	M+HCOO	C48 H89 O17	937.611	17.0189	3.30559e+06	3.30559e+06	3.30559e+06	N	1	MS2	937.611	937.611	0.00059147	0.630827	39.7117	0.560118	66.1862	6	A	M-FA-FA2+H2O-GAL-H(235.082063):MS2,FA(16:0)-H(255.23288):MS2,FA(16:0)-H [isotope](256.236337):MS2,M-FA1-FA2-H(379.124581):MS2,M-FA1-FA2+H2O-H(397.135062):MS2,M-FA1-FA2+H2O-H [isotope](398.138662):MS2,M-FA1-FA2+2H2O-H(415.145752):MS2	17.015	19430000	1	0.98	3.32212e+06	SI	3322000	0	0	17.015_3322117.246_16.822_17.200_19432047.705_0.98_3322116.25_16.840_0.000_17.185_0.000
04_BL0902-1	2290	DGDG(16:0_16:1)+HCOO	DGDG	(16:0_16:1)	M+HCOO	C48 H87 O17	935.596	15.1576	3.72972e+06	3.72972e+06	3.72972e+06	N	1	MS2	935.596	935.595	0.00141347	1.51077	39.1155	0.0867612	65.1924	6	A	M-FA-FA2+H2O-GAL-H(235.081815):MS2,FA(16:1)-H(253.217057):MS2,FA(16:1)-H [isotope](254.220414):MS2,FA(16:0)-H(255.232656):MS2,FA(16:0)-H [isotope](256.23615):MS2,M-FA1-FA2-H(379.124425):MS2,M-FA1-FA2+H2O-H(397.134985):MS2,M-FA1-FA2+H2O-H [isotope](398.138506):MS2,M-FA1-FA2+2H2O-H(415.145759):MS2,M-FA1-FA2+2H2O-H [isotope](416.150728):MS2	15.167	36730000	1	0.98	4.64226e+06	SI	4642000	0	0	15.167_4642258.807_14.940_15.377_36730699.510_0.98_4642257.81_14.981_0.000_15.366_0.000
04_BL0902-1	1912	DGDG(16:0_16:2)+HCOO	DGDG	(16:0_16:2)	M+HCOO	C48 H85 O17	933.581	13.6444	879868	879868	879868	N	1	MS2	933.58	933.579	0.00138247	1.48083	39.1455	0.0618292	65.2425	6	A	M-FA-FA2+H2O-GAL-H(235.08219):MS2,FA(16:2)-H(251.201654):MS2,FA(16:2)-H [isotope](252.204904):MS2,FA(16:0)-H(255.233098):MS2,FA(16:0)-H [isotope](256.236742):MS2,M-FA1-FA2-H(379.12446):MS2,M-FA1-FA2+H2O-H(397.135574):MS2,M-FA1-FA2+H2O-H [isotope](398.137862):MS2,M-FA1-FA2+2H2O-H(415.146023):MS2	13.679	11270000	0.93	0.94	382.08	BS	1065000	0.09	0.076	13.291_326837.366_0.097_0.091_3921878.430_0.93_390529.69_13.052_13.414;13.679_1064962.015_0.090_0.076_11270732.283_0.94_382.08_13.511_13.834
04_BL0902-1	2987	DGDG(16:0_17:0)+HCOO	DGDG	(16:0_17:0)	M+HCOO	C49 H91 O17	951.627	18.0039	164742	164742	164742	N	1	MS2	951.627	951.626	0.00096047	1.00929	31.0744	0.0304016	62.1488	5	A	M-FA-FA2+H2O-GAL-H(235.082286):MS2,FA(16:0)-H(255.23301):MS2,FA(17:0)-H(269.248734):MS2,M-FA1-FA2-H(379.124298):MS2,M-FA1-FA2+H2O-H(397.134734):MS2	18.02	919400	1	0.93	172446	SI	172400	0	0	18.020_172446.673_17.812_18.174_919351.823_0.93_172445.67_17.863_0.000_18.168_0.000
04_BL0902-1	2566	DGDG(16:0_17:1)+HCOO	DGDG	(16:0_17:1)	M+HCOO	C49 H89 O17	949.611	16.2205	875994	875994	875994	N	1	MS2	949.611	949.611	0.00096947	1.02091	38.3365	0.0796191	63.8942	6	A	M-FA-FA2+H2O-GAL-H(235.082145):MS2,FA(16:0)-H(255.232855):MS2,FA(16:0)-H [isotope](256.236781):MS2,FA(17:1)-H(267.233077):MS2,FA(17:1)-H [isotope](268.23676):MS2,M-FA1-FA2-H(379.124846):MS2,M-FA1-FA2+H2O-H(397.135233):MS2,M-FA1-FA2+H2O-H [isotope](398.139395):MS2,M-FA1-FA2+2H2O-H(415.146035):MS2	16.185	6288000	1	0.95	965897	SI	965900	0	0	16.185_965898.332_16.015_16.363_6288214.012_0.95_965897.33_16.031_0.000_16.344_0.000
04_BL0902-1	2168	DGDG(16:0_17:2)+HCOO	DGDG	(16:0_17:2)	M+HCOO	C49 H87 O17	947.596	14.6863	689576	689576	689576	N	1	MS2	947.595	947.595	0.00084647	0.893282	39.6192	0.248035	66.0319	6	A	M-FA-FA2+H2O-GAL-H(235.082225):MS2,FA(16:0)-H(255.233158):MS2,FA(16:0)-H [isotope](256.236363):MS2,FA(17:2)-H(265.217657):MS2,FA(17:2)-H [isotope](266.221163):MS2,M-FA1-FA2-H(379.124528):MS2,M-FA1-FA2+H2O-H(397.135057):MS2,M-FA1-FA2+H2O-H [isotope](398.138535):MS2,M-FA1-FA2+2H2O-H(415.145684):MS2	14.652	6346000	1	0.99	785953	SI	786000	0	0	14.652_785954.487_14.488_14.823_6345504.196_0.99_785953.49_14.488_0.000_14.807_0.000
04_BL0902-1	1875	DGDG(16:0_17:3)+HCOO	DGDG	(16:0_17:3)	M+HCOO	C49 H85 O17	945.58	13.473	660176	660176	660176	N	1	MS2	945.579	945.579	0.00065747	0.695309	39.6083	0.0927334	66.0139	6	A	M-FA-FA2+H2O-GAL-H(235.082412):MS2,FA(16:0)-H(255.23334):MS2,FA(16:0)-H [isotope](256.236947):MS2,FA(17:3)-H(263.202043):MS2,FA(17:3)-H [isotope](264.205327):MS2,M-FA1-FA2-H(379.12465):MS2,M-FA1-FA2+H2O-H(397.135529):MS2,M-FA1-FA2+H2O-H [isotope](398.138873):MS2,M-FA1-FA2+2H2O-H(415.146718):MS2	13.526	8820000	1	0.74	571.36	SI	1063000	0	0	13.526_1063369.310_12.959_13.686_8819875.559_0.74_571.36_13.131_1857.882_13.674_1857.882
04_BL0902-1	3199	DGDG(16:0_18:0)+HCOO	DGDG	(16:0_18:0)	M+HCOO	C50 H93 O17	965.643	18.9067	274627	274627	274627	N	1	MS2	965.642	965.642	0.00083147	0.861054	90.7174	1.45856	90.7174	10	A	M-FA-FA2+H2O-GAL-H(235.082187):MS2,FA(16:0)-H(255.233084):MS2,FA(16:0)-H [isotope](256.236231):MS2,FA(18:0)-H(283.264489):MS2,FA(18:0)-H [isotope](284.26822):MS2,M-FA1-FA2-H(379.125055):MS2,M-FA1-FA2-H [isotope](380.128732):MS2,M-FA1-FA2+H2O-H(397.135519):MS2,M-FA1-FA2+H2O-H [isotope](398.138934):MS2,M-FA1-FA2+2H2O-H(415.14596):MS2,DGMG(16:0)-H2O-H(635.366959):MS2,DGMG(16:0)-H(653.377025):MS2,DGM…	18.947	3677000	1	0.99	650372	SI	650400	0	0	18.947_650372.846_18.752_19.095_3676776.101_0.99_650371.85_18.785_0.000_19.089_0.000
04_BL0902-1	2802	DGDG(16:0_18:1)+HCOO	DGDG	(16:0_18:1)	M+HCOO	C50 H91 O17	963.627	17.207	7.12051e+06	7.12051e+06	7.12051e+06	N	1	MS2	963.627	963.626	0.00127047	1.31843	38.294	0.319747	63.8234	6	A	M-FA-FA2+H2O-GAL-H(235.081866):MS2,FA(16:0)-H(255.233069):MS2,FA(16:0)-H [isotope](256.2361):MS2,FA(18:1)-H(281.248748):MS2,FA(18:1)-H [isotope](282.252105):MS2,M-FA1-FA2-H(379.124719):MS2,M-FA1-FA2+H2O-H(397.135274):MS2,M-FA1-FA2+H2O-H [isotope](398.138307):MS2,M-FA1-FA2+2H2O-H(415.145823):MS2	17.166	62420000	1	0.99	8.25172e+06	SI	8252000	0	0	17.166_8251724.498_16.947_17.445_62420732.651_0.99_8251723.50_16.947_0.000_17.339_0.000
04_BL0902-1	2400	DGDG(16:0_18:2)+HCOO	DGDG	(16:0_18:2)	M+HCOO	C50 H89 O17	961.611	15.6616	32424208	32424208	32424208	N	1	MS2	961.611	961.611	0.00082047	0.853225	38.5645	0.453891	64.2742	6	A	M-FA-FA2+H2O-GAL-H(235.082285):MS2,FA(16:0)-H(255.233076):MS2,FA(16:0)-H [isotope](256.236219):MS2,FA(18:2)-H(279.233155):MS2,FA(18:2)-H [isotope](280.236399):MS2,M-FA1-FA2-H(379.124702):MS2,M-FA1-FA2+H2O-H(397.135298):MS2,M-FA1-FA2+H2O-H [isotope](398.139308):MS2,M-FA1-FA2+2H2O-H(415.145917):MS2	15.649	252700000	1	0.98	317.15	SI	39300000	0	0	15.649_39296924.180_15.427_15.855_252660384.897_0.98_317.15_15.467_123515.648_15.848_123515.648
04_BL0902-1	2404	DGDG(16:0_18:2)-H	DGDG	(16:0_18:2)	M-H	C49 H87 O15	915.605	15.6742	396391	396391	396391	N	1	MS2	915.605	915.605	2.147e-05	0.023449	37.2298	0.44136	62.0496	6	A	M-FA-FA2+H2O-GAL-H(235.082012):MS2,FA(16:0)-H(255.233117):MS2,FA(16:0)-H [isotope](256.236504):MS2,FA(18:2)-H(279.233207):MS2,FA(18:2)-H [isotope](280.236799):MS2,M-FA1-FA2-H(379.124585):MS2,M-FA1-FA2+H2O-H(397.135347):MS2,M-FA1-FA2+H2O-H [isotope](398.138899):MS2,M-FA1-FA2+2H2O-H(415.14561):MS2	15.649	3290000	1	0.95	209253	SI	520100	0	0	15.649_520062.710_15.448_15.813_3289609.776_0.95_209252.75_15.483_2.485_15.807_2.485
04_BL0902-1	2102	DGDG(16:0_18:3)+HCOO	DGDG	(16:0_18:3)	M+HCOO	C50 H87 O17	959.596	14.4784	43438464	43438464	43438464	N	1	MS2	959.595	959.595	0.00077147	0.803954	39.0621	0.0393387	65.1035	6	A	M-FA-FA2+H2O-GAL-H(235.082358):MS2,FA(16:0)-H(255.232962):MS2,FA(16:0)-H [isotope](256.235858):MS2,FA(18:3)-H(277.217333):MS2,FA(18:3)-H [isotope](278.22078):MS2,M-FA1-FA2-H(379.124398):MS2,M-FA1-FA2+H2O-H(397.135203):MS2,M-FA1-FA2+H2O-H [isotope](398.139108):MS2,M-FA1-FA2+2H2O-H(415.145569):MS2	14.499	472300000	0.94	0.96	835.58	BS	46570000	0.091	0.068	13.767_1507059.562_0.078_0.078_15053410.532_0.99_129.66_13.588_13.963;14.499_46573069.020_0.091_0.068_472325480.099_0.96_835.58_14.048_14.704
04_BL0902-1	2106	DGDG(16:0_18:3)-H	DGDG	(16:0_18:3)	M-H	C49 H85 O15	913.59	14.4979	714690	714690	714690	N	1	MS2	913.59	913.589	0.00069147	0.756872	37.619	0.0198577	62.6984	6	A	M-FA-FA2+H2O-GAL-H(235.082123):MS2,FA(16:0)-H(255.232969):MS2,FA(16:0)-H [isotope](256.236452):MS2,FA(18:3)-H(277.217369):MS2,FA(18:3)-H [isotope](278.220863):MS2,M-FA1-FA2-H(379.124645):MS2,M-FA1-FA2+H2O-H(397.13519):MS2,M-FA1-FA2+H2O-H [isotope](398.138265):MS2,M-FA1-FA2+2H2O-H(415.145741):MS2	14.499	6201000	1	0.95	723598	SI	723600	0	0	14.499_723598.558_14.297_14.692_6201131.425_0.95_723597.56_14.297_0.000_14.686_0.000
04_BL0902-1	1803	DGDG(16:0_18:4)+HCOO	DGDG	(16:0_18:4)	M+HCOO	C50 H85 O17	957.58	13.1257	2.04948e+06	2.04948e+06	2.04948e+06	N	1	MS2	957.58	957.579	0.00099447	1.03852	38.45	0.299948	64.0834	6	A	M-FA-FA2+H2O-GAL-H(235.082092):MS2,FA(16:0)-H(255.232888):MS2,FA(16:0)-H [isotope](256.236334):MS2,FA(18:4)-H(275.201423):MS2,FA(18:4)-H [isotope](276.204828):MS2,M-FA1-FA2-H(379.124263):MS2,M-FA1-FA2+H2O-H(397.134776):MS2,M-FA1-FA2+H2O-H [isotope](398.138415):MS2,M-FA1-FA2+2H2O-H(415.145522):MS2	13.104	23920000	0.89	0.89	141.63	BS	2003000	0.09	0.097	12.556_6991994.139_0.097_0.066_72903540.729_0.92_2196.46_12.101_12.851;13.104_2003107.389_0.090_0.097_23921680.058_0.89_141.63_12.851_13.392
04_BL0902-1	2560	DGDG(16:0_20:3)+HCOO	DGDG	(16:0_20:3)	M+HCOO	C52 H91 O17	987.627	16.2	353101	353101	353101	N	1	MS2	987.627	987.626	0.00087747	0.888463	38.9002	0.258812	64.8337	6	A	M-FA-FA2+H2O-GAL-H(235.082526):MS2,FA(16:0)-H(255.233082):MS2,FA(16:0)-H [isotope](256.236196):MS2,FA(20:3)-H(305.248767):MS2,FA(20:3)-H [isotope](306.251775):MS2,M-FA1-FA2-H(379.124572):MS2,M-FA1-FA2+H2O-H(397.135393):MS2,M-FA1-FA2+H2O-H [isotope](398.139323):MS2,M-FA1-FA2+2H2O-H(415.146745):MS2	16.166	3204000	1	0.98	509520	SI	530900	0	0	16.166_530863.243_15.963_16.342_3204350.489_0.98_509519.93_15.999_1.042_16.336_1.042
04_BL0902-1	1838	DGDG(16:1_16:1)+HCOO	DGDG	(16:1_16:1)	M+HCOO	C48 H85 O17	933.58	13.3047	338995	338995	338995	N	1	MS2	933.58	933.579	0.00114747	1.22911	37.5822	0.401568	62.637	6	A	M-FA-FA2+H2O-GAL-H(235.082448):MS2,FA(16:1)-H(253.21734):MS2,FA(16:1)-H [isotope](254.221139):MS2,M-FA1-FA2-H(379.125148):MS2,M-FA1-FA2+H2O-H(397.134916):MS2,M-FA1-FA2+H2O-H [isotope](398.139938):MS2,M-FA1-FA2+2H2O-H(415.146222):MS2	13.291	3922000	0.93	0.93	390530	BS	326800	0.097	0.091	13.291_326837.366_0.097_0.091_3921878.430_0.93_390529.69_13.052_13.414;13.679_1064962.015_0.090_0.076_11270732.283_0.94_382.08_13.511_13.834
04_BL0902-1	1940	DGDG(16:1_18:2)+HCOO	DGDG	(16:1_18:2)	M+HCOO	C50 H87 O17	959.596	13.7553	1.81093e+06	1.81093e+06	1.81093e+06	N	1	MS2	959.595	959.595	0.00107147	1.11659	39.5482	0.762457	65.9137	6	A	M-FA-FA2+H2O-GAL-H(235.082334):MS2,FA(16:1)-H(253.217276):MS2,FA(16:1)-H [isotope](254.22061):MS2,FA(18:2)-H(279.232971):MS2,FA(18:2)-H [isotope](280.236301):MS2,M-FA1-FA2-H(379.125084):MS2,M-FA1-FA2+H2O-H(397.135163):MS2,M-FA1-FA2+H2O-H [isotope](398.138649):MS2,M-FA1-FA2+2H2O-H(415.145614):MS2	13.752	14100000	1	0.99	106.01	SI	1811000	0	0	13.752_1810593.745_13.598_13.961_14103148.909_0.99_106.01_13.598_16920.301_13.944_16920.301
04_BL0902-1	1688	DGDG(16:1_18:3)+HCOO	DGDG	(16:1_18:3)	M+HCOO	C50 H85 O17	957.58	12.5655	6.72924e+06	6.72924e+06	6.72924e+06	N	1	MS2	957.58	957.579	0.00107747	1.1252	38.756	0.260204	64.5933	6	A	M-FA-FA2+H2O-GAL-H(235.082372):MS2,FA(16:1)-H(253.217441):MS2,FA(16:1)-H [isotope](254.220626):MS2,FA(18:3)-H(277.217493):MS2,FA(18:3)-H [isotope](278.220887):MS2,M-FA1-FA2-H(379.124576):MS2,M-FA1-FA2+H2O-H(397.135306):MS2,M-FA1-FA2+H2O-H [isotope](398.138596):MS2,M-FA1-FA2+2H2O-H(415.14586):MS2	12.547	72420000	1	0.89	494.47	SI	8300000	0	0	12.547_8299639.399_12.117_12.717_72416387.977_0.89_494.47_12.145_16751.110_12.707_16751.110
04_BL0902-1	1418	DGDG(16:1_18:4)+HCOO	DGDG	(16:1_18:4)	M+HCOO	C50 H83 O17	955.564	11.0948	196586	196586	196586	N	1	MS2	955.564	955.564	0.00069847	0.730951	36.6802	0.204618	61.1337	6	A	M-FA-FA2+H2O-GAL-H(235.082096):MS2,FA(16:1)-H(253.217626):MS2,FA(16:1)-H [isotope](254.221188):MS2,FA(18:4)-H(275.201597):MS2,FA(18:4)-H [isotope](276.205456):MS2,M-FA1-FA2-H(379.125084):MS2,M-FA1-FA2+H2O-H(397.135613):MS2,M-FA1-FA2+H2O-H [isotope](398.140296):MS2,M-FA1-FA2+2H2O-H(415.147224):MS2	11.099	2525000	1	0.44	259018	SI	259000	0	0	11.099_259018.621_10.746_11.234_2524849.193_0.44_259017.62_10.746_0.000_11.218_0.000
04_BL0902-1	2048	DGDG(18:2_18:2)+HCOO	DGDG	(18:2_18:2)	M+HCOO	C52 H89 O17	985.611	14.259	195182	195182	195182	N	1	MS2	985.611	985.611	0.00095647	0.970434	36.8667	0.985397	61.4444	6	A	M-FA-FA2+H2O-GAL-H(235.082517):MS2,FA(18:2)-H(279.23302):MS2,FA(18:2)-H [isotope](280.235843):MS2,M-FA1-FA2-H(379.123662):MS2,M-FA1-FA2+H2O-H(397.135044):MS2,M-FA1-FA2+2H2O-H(415.146461):MS2	14.284	1817000	1	0.86	249122	SI	249100	0	0	14.284_249122.983_14.054_14.448_1816563.692_0.86_249121.98_14.091_0.000_14.442_0.000
04_BL0902-1	1800	DGDG(18:2_18:3)+HCOO	DGDG	(18:2_18:3)	M+HCOO	C52 H87 O17	983.596	13.1156	311430	311430	311430	N	1	MS2	983.595	983.595	0.00092147	0.936839	30.1044	0.590688	60.2088	5	A	M-FA-FA2+H2O-GAL-H(235.081875):MS2,FA(18:3)-H(277.217658):MS2,FA(18:3)-H [isotope](278.220124):MS2,FA(18:2)-H(279.233465):MS2,FA(18:2)-H [isotope](280.236119):MS2,M-FA1-FA2-H(379.12404):MS2,M-FA1-FA2+H2O-H(397.135579):MS2	13.089	2988000	1	0.93	105595	SI	327700	0	0	13.089_327722.662_12.872_13.391_2987641.320_0.93_105594.96_12.872_3.104_13.358_3.104
04_BL0902-1	433	DGMG(16:0)+HCOO	DGMG	(16:0)	M+HCOO	C32 H59 O16	699.382	3.36953	528997	528997	528997	N	1	MS2	699.381	699.381	0.00076447	1.09307	13.7081	1.00769	34.2703	4	B	M-FA(16:0)-GAL-H(235.083362):MS2,FA(16:0)-H(255.23308):MS2,FA(16:0)-H [isotope](256.23535):MS2,M-FA(16:0)-H(397.135506):MS2,M-FA(16:0)+H2O-H(415.145208):MS2	3.416	12910000	0.63	0.86	880778	BS	753200	0.102	0.167	3.416_753200.628_0.102_0.167_12909372.849_0.86_880777.56_3.199_3.629;3.711_167028.935_0.092_0.091_1948414.464_0.84_14.56_3.629_3.846
04_BL0902-1	2234	MGDG(14:0_18:2)+HCOO	MGDG	(14:0_18:2)	M+HCOO	C42 H75 O12	771.528	14.9446	556034	556034	556034	N	1	MS2	771.527	771.526	0.00141947	1.83982	17.2524	0.169911	57.508	3	A	FA(14:0)-H(227.201384):MS2,M-FA1-FA2+2H2O-H(253.092703):MS2,FA(18:2)-H(279.233134):MS2	14.924	4606000	0.94	0.9	4.2	BS	533700	0.068	0.068	14.741_419051.469_0.083_0.064_3923192.712_0.85_484304.75_14.559_14.821;14.924_533720.105_0.068_0.068_4606144.411_0.90_4.20_14.821_14.999;15.124_2348858.775_0.062_0.059_18130303.178_0.99_38.78_14.999_15.273
04_BL0902-1	1918	MGDG(14:0_18:3)+HCOO	MGDG	(14:0_18:3)	M+HCOO	C42 H73 O12	769.511	13.6693	538312	538312	538312	N	1	MS2	769.511	769.511	0.00072747	0.945367	18.1268	0.522917	60.4227	3	A	FA(14:0)-H(227.201366):MS2,M-FA1-FA2+2H2O-H(253.092701):MS2,FA(18:3)-H(277.217409):MS2	13.652	5002000	1	0.97	91585.6	SI	604000	0	0	13.652_603964.649_13.458_13.806_5002332.518_0.97_91585.56_13.474_6.594_13.800_6.594
04_BL0902-1	3067	MGDG(16:0_16:0)+HCOO	MGDG	(16:0_16:0)	M+HCOO	C42 H79 O12	775.559	18.3968	5295247	5295247	5295247	N	1	MS2	775.558	775.558	0.00095447	1.23069	38.4843	0.566617	96.2106	4	A	M-FA1-FA2+H2O-H(235.082294):MS2,M-FA1-FA2+2H2O-H(253.092488):MS2,FA(16:0)-H(255.233):MS2,FA(16:0)-H [isotope](256.236662):MS2	18.381	35400000	1	1	596.67	SI	5697000	0	0	18.381_5696664.558_18.127_18.683_35401611.995_1.00_596.67_18.127_9531.455_18.648_9531.455
04_BL0902-1	2648	MGDG(16:0_16:1)+HCOO	MGDG	(16:0_16:1)	M+HCOO	C42 H77 O12	773.543	16.5801	13507879	13507879	13507879	N	1	MS2	773.542	773.542	0.00074147	0.958538	38.7023	0.360956	96.7557	4	A	M-FA1-FA2+H2O-H(235.082407):MS2,M-FA1-FA2+2H2O-H(253.093039):MS2,FA(16:1)-H(253.217676):MS2,FA(16:1)-H [isotope](254.220715):MS2,FA(16:0)-H(255.233309):MS2,FA(16:0)-H [isotope](256.236834):MS2	16.613	126800000	1	1	1418.79	SI	17160000	0	0	16.613_17157038.086_16.404_16.819_126799291.964_1.00_1418.79_16.424_12084.196_16.812_12084.196
04_BL0902-1	2280	MGDG(16:0_16:2)+HCOO	MGDG	(16:0_16:2)	M+HCOO	C42 H75 O12	771.527	15.1244	2.14899e+06	2.14899e+06	2.14899e+06	N	1	MS2	771.527	771.526	0.00103547	1.3421	37.7188	0.34975	94.297	4	A	M-FA1-FA2+H2O-H(235.082461):MS2,FA(16:2)-H(251.201499):MS2,FA(16:2)-H [isotope](252.205772):MS2,M-FA1-FA2+2H2O-H(253.093212):MS2,FA(16:0)-H(255.233041):MS2,FA(16:0)-H [isotope](256.236873):MS2	15.124	18130000	0.94	0.99	38.78	BS	2349000	0.062	0.059	14.741_419051.469_0.083_0.064_3923192.712_0.85_484304.75_14.559_14.821;14.924_533720.105_0.068_0.068_4606144.411_0.90_4.20_14.821_14.999;15.124_2348858.775_0.062_0.059_18130303.178_0.99_38.78_14.999_15.273
04_BL0902-1	3307	MGDG(16:0_17:0)+HCOO	MGDG	(16:0_17:0)	M+HCOO	C43 H81 O12	789.574	19.3057	269987	269987	269987	N	1	MS2	789.574	789.573	0.00099947	1.26583	7.29678	1.91534	36.4839	2	B	FA(16:0)-H(255.233715):MS2,FA(17:0)-H(269.249016):MS2	19.332	1821000	0.91	0.85	418605	BS	315900	0.049	0.041	19.332_315941.548_0.049_0.041_1821086.613_0.85_418604.68_19.233_19.411;19.448_131598.909_0.042_0.048_757010.104_0.89_137892.06_19.411_19.545
04_BL0902-1	2908	MGDG(16:0_17:1)+HCOO	MGDG	(16:0_17:1)	M+HCOO	C43 H79 O12	787.559	17.586	4.9661e+06	4.9661e+06	4.9661e+06	N	1	MS2	787.558	787.558	0.00080247	1.01893	38.4748	0.261894	96.1869	4	A	M-FA1-FA2+H2O-H(235.081916):MS2,M-FA1-FA2+2H2O-H(253.092831):MS2,FA(16:0)-H(255.232598):MS2,FA(16:0)-H [isotope](256.235899):MS2,FA(17:1)-H(267.232813):MS2,FA(17:1)-H [isotope](268.236091):MS2	17.579	30910000	1	1	4.97251e+06	SI	4973000	0	0	17.579_4972511.487_17.396_17.783_30911687.458_1.00_4972510.49_17.414_0.000_17.777_0.000
04_BL0902-1	2535	MGDG(16:0_17:2)+HCOO	MGDG	(16:0_17:2)	M+HCOO	C43 H77 O12	785.543	16.1155	2.57935e+06	2.57935e+06	2.57935e+06	N	1	MS2	785.543	785.542	0.00111447	1.41873	37.5632	0.1842	93.9079	4	A	M-FA1-FA2+H2O-H(235.081534):MS2,M-FA1-FA2+2H2O-H(253.093079):MS2,FA(16:0)-H(255.233278):MS2,FA(16:0)-H [isotope](256.23601):MS2,FA(17:2)-H(265.217739):MS2,FA(17:2)-H [isotope](266.221027):MS2	16.12	19780000	1	1	2.91378e+06	SI	2914000	0	0	16.120_2913777.808_15.925_16.273_19775549.130_1.00_2913776.81_15.925_0.000_16.268_0.000
04_BL0902-1	2226	MGDG(16:0_17:3)+HCOO	MGDG	(16:0_17:3)	M+HCOO	C43 H75 O12	783.527	14.9161	2152761	2152761	2152761	N	1	MS2	783.527	783.526	0.00098247	1.25391	26.2446	0.561571	87.4819	3	A	M-FA1-FA2+2H2O-H(253.092775):MS2,FA(16:0)-H(255.232941):MS2,FA(16:0)-H [isotope](256.23645):MS2,FA(17:3)-H(263.201849):MS2,FA(17:3)-H [isotope](264.205584):MS2	14.941	17550000	1	0.99	2.51882e+06	SI	2519000	0	0	14.941_2518816.473_14.587_15.157_17553248.235_0.99_2518815.47_14.614_0.000_15.143_0.000
04_BL0902-1	3542	MGDG(16:0_18:0)+HCOO	MGDG	(16:0_18:0)	M+HCOO	C44 H83 O12	803.59	20.2588	946231	946231	946231	N	1	MS2	803.59	803.589	0.00120547	1.50011	19.4077	2.46312	64.6923	3	A	M-FA1-FA2+2H2O-H(253.093393):MS2,FA(16:0)-H(255.232933):MS2,FA(16:0)-H [isotope](256.236147):MS2,FA(18:0)-H(283.264371):MS2,FA(18:0)-H [isotope](284.268401):MS2	20.228	6916000	0.94	0.97	1.32504e+06	BS	1156000	0.052	0.042	20.228_1155830.636_0.052_0.042_6916220.734_0.97_1325044.22_20.085_20.285;20.331_896140.514_0.032_0.056_5022983.776_0.69_1101838.12_20.285_20.446
04_BL0902-1	3110	MGDG(16:0_18:1)+HCOO	MGDG	(16:0_18:1)	M+HCOO	C44 H81 O12	801.574	18.5555	40983064	40983064	40983064	N	1	MS2	801.574	801.573	0.00088947	1.10965	33.5471	1.32715	83.8678	4	A	M-FA1-FA2+H2O-H(235.082231):MS2,M-FA1-FA2+2H2O-H(253.092604):MS2,FA(16:0)-H(255.232998):MS2,FA(16:0)-H [isotope](256.236):MS2,FA(18:1)-H(281.248633):MS2,FA(18:1)-H [isotope](282.252104):MS2	18.535	362300000	1	0.95	2008.74	SI	62290000	0	0	18.535_62288872.891_18.303_18.749_362298961.826_0.95_2008.74_18.324_30993.447_18.742_30993.447
04_BL0902-1	3102	MGDG(16:0_18:1)-H	MGDG	(16:0_18:1)	M-H	C43 H79 O10	755.568	18.5238	179237	179237	179237	N	1	MS2	755.567	755.568	2.447e-05	0.0323863	38.7029	1.29548	96.7572	4	A	M-FA1-FA2+H2O-H(235.08183):MS2,M-FA1-FA2+2H2O-H(253.092572):MS2,FA(16:0)-H(255.232987):MS2,FA(16:0)-H [isotope](256.23662):MS2,FA(18:1)-H(281.248636):MS2,FA(18:1)-H [isotope](282.252291):MS2	18.517	817800	1	0.91	192555	SI	192600	0	0	18.517_192555.936_18.350_18.703_817769.554_0.91_192554.94_18.383_0.000_18.681_0.000
04_BL0902-1	2749	MGDG(16:0_18:2)+HCOO	MGDG	(16:0_18:2)	M+HCOO	C44 H79 O12	799.559	16.9959	84445872	84445872	84445872	N	1	MS2	799.558	799.558	0.00091547	1.14497	38.6833	0.0226061	96.7083	4	A	M-FA1-FA2+H2O-H(235.082171):MS2,M-FA1-FA2+2H2O-H(253.092682):MS2,FA(16:0)-H(255.233085):MS2,FA(16:0)-H [isotope](256.235896):MS2,FA(18:2)-H(279.233003):MS2,FA(18:2)-H [isotope](280.236414):MS2	17.021	745600000	1	0.99	328.03	SI	113700000	0	0	17.021_113705434.375_16.720_17.217_745608302.877_0.99_328.03_16.861_345580.295_17.209_345580.295
04_BL0902-1	2748	MGDG(16:0_18:2)-H	MGDG	(16:0_18:2)	M-H	C43 H77 O10	753.551	16.9902	173886	173886	173886	N	1	MS2	753.551	753.552	-0.00103353	-1.37155	39.1279	0.0169181	97.8196	4	A	M-FA1-FA2+H2O-H(235.081921):MS2,M-FA1-FA2+2H2O-H(253.092484):MS2,FA(16:0)-H(255.232766):MS2,FA(16:0)-H [isotope](256.236104):MS2,FA(18:2)-H(279.232854):MS2,FA(18:2)-H [isotope](280.236127):MS2	17.049	1857000	1	0.74	422500	SI	422500	0	0	17.049_422500.776_16.880_17.160_1856798.891_0.74_422499.78_16.893_0.000_17.144_0.000
04_BL0902-1	2472	MGDG(16:0_18:3)+HCOO	MGDG	(16:0_18:3)	M+HCOO	C44 H77 O12	797.543	15.8979	144303504	144303504	144303504	N	1	MS2	797.543	797.542	0.00107847	1.35224	36.5161	0.431	91.2904	4	A	M-FA1-FA2+H2O-H(235.081201):MS2,M-FA1-FA2+2H2O-H(253.09249):MS2,FA(16:0)-H(255.233176):MS2,FA(16:0)-H [isotope](256.236852):MS2,FA(18:3)-H(277.217489):MS2,FA(18:3)-H [isotope](278.221066):MS2	15.925	1108000000	1	0.97	312.11	SI	151800000	0	0	15.925_151819399.200_15.514_16.114_1108189425.827_0.97_312.11_15.599_484875.678_16.105_484875.678
04_BL0902-1	2487	MGDG(16:0_18:3)-H	MGDG	(16:0_18:3)	M-H	C43 H75 O10	751.539	15.9543	180405	180405	180405	N	1	MS2	751.539	751.537	0.00262947	3.49878	38.0361	0.487428	95.0902	4	A	M-FA1-FA2+H2O-H(235.081785):MS2,M-FA1-FA2+2H2O-H(253.093045):MS2,FA(16:0)-H(255.23297):MS2,FA(16:0)-H [isotope](256.236267):MS2,FA(18:3)-H(277.217373):MS2,FA(18:3)-H [isotope](278.220707):MS2	15.9	3798000	0.78	0.97	543655	BS	430400	0.072	0.066	15.900_430420.617_0.072_0.066_3798352.619_0.97_543655.14_15.744_16.085;15.711_3652.450_0.015_0.014_6926.636_0.98_7636.82_15.671_15.744
04_BL0902-1	2120	MGDG(16:0_18:4)+HCOO	MGDG	(16:0_18:4)	M+HCOO	C44 H75 O12	795.527	14.5364	1.97644e+06	1.97644e+06	1.97644e+06	N	1	MS2	795.527	795.526	0.00088747	1.11558	33.8927	0.595751	84.7318	4	A	M-FA1-FA2+H2O-H(235.081872):MS2,M-FA1-FA2+2H2O-H(253.093158):MS2,FA(16:0)-H(255.233036):MS2,FA(16:0)-H [isotope](256.236062):MS2,FA(18:4)-H(275.201956):MS2,FA(18:4)-H [isotope](276.205278):MS2	14.542	20670000	0.94	0.91	21.63	BS	1951000	0.085	0.081	14.542_1950607.520_0.085_0.081_20670207.935_0.91_21.63_14.372_14.653;13.980_7643833.987_0.082_0.065_71290519.593_0.97_296.04_13.639_14.372
04_BL0902-1	3347	MGDG(16:0_19:1)+HCOO	MGDG	(16:0_19:1)	M+HCOO	C45 H83 O12	815.591	19.4407	1.04365e+06	1.04365e+06	1.04365e+06	N	1	MS2	815.59	815.589	0.00156247	1.91575	19.521	1.77924	65.0701	3	A	M-FA1-FA2+2H2O-H(253.093094):MS2,FA(16:0)-H(255.232823):MS2,FA(16:0)-H [isotope](256.235361):MS2,FA(19:1)-H(295.264146):MS2,FA(19:1)-H [isotope](296.266997):MS2	19.429	5901000	1	0.98	13472.8	SI	1108000	0	0	19.429_1107737.611_19.225_19.576_5901347.754_0.98_13472.79_19.258_82.214_19.548_82.214
04_BL0902-1	2968	MGDG(16:0_19:2)+HCOO	MGDG	(16:0_19:2)	M+HCOO	C45 H81 O12	813.575	17.8993	257699	257699	257699	N	1	MS2	813.574	813.573	0.00135447	1.66484	10.4664	0.0377262	52.332	2	B	FA(16:0)-H(255.232833):MS2,FA(19:2)-H(293.248848):MS2	17.913	3323000	1	0.77	308017	SI	308000	0	0	17.913_308018.297_17.518_18.153_3323413.124_0.77_308017.30_17.548_0.315_18.143_0.315
04_BL0902-1	3176	MGDG(16:0_20:2)+HCOO	MGDG	(16:0_20:2)	M+HCOO	C46 H83 O12	827.591	18.8066	267318	267318	267318	N	1	MS2	827.59	827.589	0.00162247	1.96048	11.1585	1.27867	55.7923	2	B	FA(16:0)-H(255.232643):MS2,FA(20:2)-H(307.264657):MS2	18.782	2689000	1	0.8	380751	SI	380800	0	0	18.782_380752.191_18.491_18.879_2689196.625_0.80_380751.19_18.491_0.000_18.873_0.000
04_BL0902-1	2891	MGDG(16:0_20:3)+HCOO	MGDG	(16:0_20:3)	M+HCOO	C46 H81 O12	825.574	17.5305	1.22708e+06	1.22708e+06	1.22708e+06	N	1	MS2	825.574	825.573	0.00109447	1.32571	22.7617	0.29969	75.8724	3	A	M-FA1-FA2+2H2O-H(253.092514):MS2,FA(16:0)-H(255.232924):MS2,FA(16:0)-H [isotope](256.236338):MS2,FA(20:3)-H(305.248633):MS2,FA(20:3)-H [isotope](306.252551):MS2	17.526	7177000	1	0.96	1.22722e+06	SI	1227000	0	0	17.526_1227219.904_17.361_17.730_7177062.710_0.96_1227218.90_17.361_0.000_17.701_0.000
04_BL0902-1	2184	MGDG(16:1_16:1)+HCOO	MGDG	(16:1_16:1)	M+HCOO	C42 H75 O12	771.527	14.7589	482498	482498	482498	N	1	MS2	771.527	771.526	0.00064947	0.841799	10.2149	0.0158352	51.0747	2	B	FA(16:1)-H(253.217769):MS2	14.741	3923000	0.94	0.85	484305	BS	419100	0.083	0.064	14.741_419051.469_0.083_0.064_3923192.712_0.85_484304.75_14.559_14.821;14.924_533720.105_0.068_0.068_4606144.411_0.90_4.20_14.821_14.999;15.124_2348858.775_0.062_0.059_18130303.178_0.99_38.78_14.999_15.273
04_BL0902-1	2706	MGDG(16:1_18:1)+HCOO	MGDG	(16:1_18:1)	M+HCOO	C44 H79 O12	799.559	16.8162	565790	565790	565790	N	1	MS2	799.559	799.558	0.00134847	1.68652	21.8392	0.157089	72.7974	3	A	M-FA1-FA2+2H2O-H(253.093382):MS2,FA(16:1)-H(253.217539):MS2,FA(18:1)-H(281.248949):MS2,FA(18:1)-H [isotope](282.252685):MS2	17.021	745600000	1	0.99	328.03	SI	113700000	0	0	17.021_113705434.375_16.720_17.217_745608302.877_0.99_328.03_16.861_345580.295_17.209_345580.295
04_BL0902-1	2271	MGDG(16:1_18:2)+HCOO	MGDG	(16:1_18:2)	M+HCOO	C44 H77 O12	797.543	15.0883	266003	266003	266003	N	1	MS2	797.543	797.542	0.00121847	1.52778	11.8749	0.378589	59.3744	2	B	FA(16:1)-H(253.217334):MS2,FA(18:2)-H(279.233161):MS2	15.168	16080000	1	1	58.24	SI	2212000	0	0	14.942_127931.641_14.750_15.003_809829.151_0.86_127930.64_14.750_0.000_15.003_0.000;13.975_350560.868_13.758_14.219_2830767.922_0.97_350559.87_13.758_0.000_14.219_0.000;14.541_116070.422_14.384_14.750_759319.080_0.94_279.18_14.384_414.264_14.689_414.264;15.168_2211973.920_15.003_15.316_16079495.986_1.00_58.24_15.003_37341.333_15.316_37341.333
04_BL0902-1	1996	MGDG(16:1_18:3)+HCOO	MGDG	(16:1_18:3)	M+HCOO	C44 H75 O12	795.528	14.0214	6.8615e+06	6.8615e+06	6.8615e+06	N	1	MS2	795.527	795.526	0.00128347	1.61336	36.681	0.0807824	91.7024	4	A	M-FA1-FA2+H2O-H(235.082308):MS2,M-FA1-FA2+2H2O-H(253.093154):MS2,FA(16:1)-H(253.217352):MS2,FA(16:1)-H [isotope](254.220367):MS2,FA(18:3)-H(277.217379):MS2,FA(18:3)-H [isotope](278.220683):MS2	13.978	74790000	1	0.96	243.19	SI	8589000	0	0	13.978_8589237.616_13.588_14.374_74787246.627_0.96_243.19_13.625_35173.819_14.361_35173.819
04_BL0902-1	1682	MGDG(16:1_18:4)+HCOO	MGDG	(16:1_18:4)	M+HCOO	C44 H73 O12	793.512	12.5442	278952	278952	278952	N	1	MS2	793.511	793.511	0.00119547	1.50656	8.64259	0.287482	43.213	2	B	FA(16:1)-H(253.216905):MS2,FA(18:4)-H(275.201859):MS2	12.541	2498000	1	0.51	281123	SI	281100	0	0	12.541_281124.424_12.235_12.649_2498194.874_0.51_281123.42_12.235_0.000_12.642_0.000
04_BL0902-1	2985	MGDG(17:0_18:2)+HCOO	MGDG	(17:0_18:2)	M+HCOO	C45 H81 O12	813.575	17.9951	202079	202079	202079	N	1	MS2	813.574	813.573	0.00164647	2.02375	5.19904	0.0581088	25.9952	2	B	FA(17:0)-H(269.24903):MS2,FA(18:2)-H(279.23285):MS2	17.913	3323000	1	0.77	308017	SI	308000	0	0	17.913_308018.297_17.518_18.153_3323413.124_0.77_308017.30_17.548_0.315_18.143_0.315
04_BL0902-1	2801	MGDG(18:1_18:2)+HCOO	MGDG	(18:1_18:2)	M+HCOO	C46 H81 O12	825.575	17.2013	277117	277117	277117	N	1	MS2	825.574	825.573	0.00128547	1.55706	21.1707	0.628894	70.5689	3	A	M-FA1-FA2+H2O-H(235.08194):MS2,FA(18:2)-H(279.232983):MS2,FA(18:1)-H(281.248726):MS2	17.236	2363000	1	0.61	359529	SI	359500	0	0	17.236_359529.994_17.046_17.330_2362959.064_0.61_359528.99_17.072_0.000_17.325_0.000
04_BL0902-1	2546	MGDG(18:1_18:3)+HCOO	MGDG	(18:1_18:3)	M+HCOO	C46 H79 O12	823.559	16.1503	272696	272696	272696	N	1	MS2	823.559	823.558	0.00142947	1.73572	10.9511	0.0688827	54.7554	2	B	FA(18:3)-H(277.217396):MS2,FA(18:1)-H(281.248995):MS2	16.121	3460000	1	0.92	423869	SI	423900	0	0	16.121_423870.380_15.870_16.331_3460304.870_0.92_423869.38_15.914_0.000_16.324_0.000
04_BL0902-1	2416	MGDG(18:2_18:2)+HCOO	MGDG	(18:2_18:2)	M+HCOO	C46 H79 O12	823.559	15.7151	192549	192549	192549	N	1	MS2	823.558	823.558	0.00127547	1.54873	7.06694	0.504049	35.3347	2	B	FA(18:2)-H(279.23274):MS2	15.658	2191000	1	0.98	316321	SI	316300	0	0	15.658_316321.620_15.476_15.855_2191410.594_0.98_316320.62_15.529_0.000_15.810_0.000
04_BL0902-1	2111	MGDG(18:2_18:3)+HCOO	MGDG	(18:2_18:3)	M+HCOO	C46 H77 O12	821.543	14.5127	210074	210074	210074	N	1	MS2	821.543	821.542	0.00102547	1.24823	10.7331	0.26204	53.6656	2	B	FA(18:3)-H(277.217556):MS2,FA(18:2)-H(279.233119):MS2	14.457	2459000	1	0.97	14959.3	SI	335400	0	0	14.457_335410.128_14.331_14.658_2458519.568_0.97_14959.31_14.331_22.420_14.653_22.420
04_BL0902-1	1829	MGDG(18:3_18:3)+HCOO	MGDG	(18:3_18:3)	M+HCOO	C46 H75 O12	819.528	13.2627	160027	160027	160027	N	1	MS2	819.527	819.526	0.00121347	1.4807	9.34017	0.116303	46.7008	2	B	FA(18:3)-H(277.217353):MS2	13.273	1418000	1	0.71	13.59	SI	226500	0	0	13.273_226453.493_13.090_13.367_1418166.894_0.71_13.59_13.090_15517.903_13.359_15517.903;13.005_31873.088_12.872_13.090_228815.593_0.70_31872.09_12.872_0.000_13.090_0.000
04_BL0902-1	496	MGMG(16:0)+HCOO	MGMG	(16:0)	M+HCOO	C26 H49 O11	537.328	3.96418	1.78025e+06	1.78025e+06	1.78025e+06	N	1	MS2	537.328	537.328	0.00028647	0.533138	24.2451	0.792746	80.8169	3	B	M-FA(16:0)-H(235.082167):MS2,M-FA(16:0)+H2O-H(253.092831):MS2,FA(16:0)-H(255.233022):MS2	4.097	34130000	1	0.76	577.99	SI	2486000	0	0	4.097_2486373.235_3.801_4.325_34128079.706_0.76_577.99_3.801_4294.312_4.325_4294.312;4.416_642792.341_4.325_4.570_4453177.057_0.79_19.00_4.325_32144.627_4.547_32144.627
04_BL0902-1	2023	SQDG(16:0_16:0)-H	SQDG	(16:0_16:0)	M-H	C41 H77 O12 S1	793.516	14.1327	222580	222580	222580	N	1	MS2	793.515	793.514	0.00143047	1.8027	13.9716	3.6975	34.929	4	B	FA(16:0)-H(255.233031):MS2,SQMG(16:0)-H2O-H(537.275466):MS2,M-H(793.514792):MS2	14.259	5527000	1	0.68	737585	SI	737600	0	0	14.259_737585.878_14.027_14.400_5526962.914_0.68_737584.88_14.027_0.000_14.394_0.000
04_BL0902-1	3278	SQDG(17:5_23:2)+HCOO	SQDG	(17:5_23:2)	M+HCOO	C50 H81 O14 S1	937.535	19.2163	77774640	77774640	77774640	N	1	MS2	937.535	937.535	-0.00017853	-0.190425	8.8439	2.99712	44.2195	2	B	SQMG(17:5)-H2O-H(541.21035):MS2,SQMG(17:5)-H2O-H [isotope](542.212836):MS2,M-H(891.529738):MS2,M-H [isotope](892.528514):MS2,M+HCOO(937.533595):MS2	19.261	820400000	1	0.98	2729.27	SI	121700000	0	0	19.261_121666787.878_19.074_19.541_820443800.624_0.98_2729.27_19.096_44562.206_19.445_44562.206
04_BL0902-1	2978	SQDG(17:5_23:3)+HCOO	SQDG	(17:5_23:3)	M+HCOO	C50 H79 O14 S1	935.519	17.9542	816383	816383	816383	N	1	MS2	935.519	935.52	-0.00011653	-0.124562	7.67182	3.17951	38.3591	2	B	SQMG(17:5)-H2O-H(541.20927):MS2,SQMG(17:5)-H2O-H [isotope](542.212594):MS2,M-H(889.514622):MS2	17.911	5633000	1	0.94	955832	SI	955800	0	0	17.911_955833.159_17.726_18.051_5633101.183_0.94_955832.16_17.757_0.000_18.046_0.000
05_BL0902-3	1872	DGDG(14:0_18:2)+HCOO	DGDG	(14:0_18:2)	M+HCOO	C48 H85 O17	933.58	13.4809	155043	155043	155043	N	1	MS2	933.58	933.579	0.00091747	0.982744	29.2818	0.216105	58.5635	5	A	FA(14:0)-H(227.201394):MS2,M-FA-FA2+H2O-GAL-H(235.08172):MS2,FA(18:2)-H(279.233158):MS2,FA(18:2)-H [isotope](280.236413):MS2,M-FA1-FA2+H2O-H(397.136082):MS2,M-FA1-FA2+2H2O-H(415.146838):MS2	13.475	1720000	0.92	0.84	0.42	BS	155000	0.089	0.084	13.289_333041.097_0.086_0.086_3678097.746_0.95_373366.21_13.055_13.419;13.475_154990.786_0.089_0.084_1720100.263_0.84_0.42_13.419_13.512;13.678_1126853.845_0.080_0.065_10380899.590_0.92_79.93_13.512_13.821
05_BL0902-3	1620	DGDG(14:0_18:3)+HCOO	DGDG	(14:0_18:3)	M+HCOO	C48 H83 O17	931.565	12.2161	326568	326568	326568	N	1	MS2	931.564	931.564	0.00123947	1.33053	37.6779	0.252787	62.7965	6	A	FA(14:0)-H(227.201021):MS2,FA(14:0)-H [isotope](228.204656):MS2,M-FA-FA2+H2O-GAL-H(235.081988):MS2,M-FA-FA2+H2O-GAL-H [isotope](236.087315):MS2,FA(18:3)-H(277.217217):MS2,FA(18:3)-H [isotope](278.220803):MS2,M-FA1-FA2-H(379.123838):MS2,M-FA1-FA2+H2O-H(397.134892):MS2,M-FA1-FA2+2H2O-H(415.146425):MS2	12.216	3155000	0.89	0.92	49.86	BS	310000	0.099	0.061	12.216_309992.576_0.099_0.061_3155009.329_0.92_49.86_11.955_12.438;12.468_58074.098_0.093_0.095_699224.471_0.85_65251.96_12.438_12.584
05_BL0902-3	2720	DGDG(16:0_16:0)+HCOO	DGDG	(16:0_16:0)	M+HCOO	C48 H89 O17	937.611	17.0237	2821568	2821568	2821568	N	1	MS2	937.611	937.611	0.00075347	0.803606	39.2688	0.370127	65.448	6	A	M-FA-FA2+H2O-GAL-H(235.082165):MS2,FA(16:0)-H(255.232868):MS2,FA(16:0)-H [isotope](256.236266):MS2,M-FA1-FA2-H(379.124618):MS2,M-FA1-FA2+H2O-H(397.135338):MS2,M-FA1-FA2+H2O-H [isotope](398.138434):MS2,M-FA1-FA2+2H2O-H(415.14569):MS2	17.034	18820000	1	0.98	3.26521e+06	SI	3265000	0	0	17.034_3265214.807_16.831_17.336_18820700.884_0.98_3265213.81_16.831_0.000_17.205_0.000
05_BL0902-3	2266	DGDG(16:0_16:1)+HCOO	DGDG	(16:0_16:1)	M+HCOO	C48 H87 O17	935.596	15.1654	3.53819e+06	3.53819e+06	3.53819e+06	N	1	MS2	935.596	935.595	0.00134247	1.43488	38.7082	0.0876653	64.5136	6	A	M-FA-FA2+H2O-GAL-H(235.082201):MS2,FA(16:1)-H(253.217288):MS2,FA(16:1)-H [isotope](254.220743):MS2,FA(16:0)-H(255.232879):MS2,FA(16:0)-H [isotope](256.236389):MS2,M-FA1-FA2-H(379.124556):MS2,M-FA1-FA2+H2O-H(397.135154):MS2,M-FA1-FA2+H2O-H [isotope](398.138543):MS2,M-FA1-FA2+2H2O-H(415.146127):MS2	15.182	36350000	1	0.99	2.23481e+06	SI	4452000	0	0	15.182_4452435.808_14.951_15.395_36351435.110_0.99_2234810.05_14.972_1.992_15.388_1.992
05_BL0902-3	1913	DGDG(16:0_16:2)+HCOO	DGDG	(16:0_16:2)	M+HCOO	C48 H85 O17	933.58	13.673	1.12548e+06	1.12548e+06	1.12548e+06	N	1	MS2	933.58	933.579	0.00112647	1.20661	38.7044	0.0239863	64.5074	6	A	M-FA-FA2+H2O-GAL-H(235.082301):MS2,FA(16:2)-H(251.20184):MS2,FA(16:2)-H [isotope](252.205326):MS2,FA(16:0)-H(255.233168):MS2,FA(16:0)-H [isotope](256.236234):MS2,M-FA1-FA2-H(379.124826):MS2,M-FA1-FA2+H2O-H(397.135341):MS2,M-FA1-FA2+H2O-H [isotope](398.139096):MS2,M-FA1-FA2+2H2O-H(415.146433):MS2	13.678	10380000	0.92	0.92	79.93	BS	1127000	0.08	0.065	13.289_333041.097_0.086_0.086_3678097.746_0.95_373366.21_13.055_13.419;13.475_154990.786_0.089_0.084_1720100.263_0.84_0.42_13.419_13.512;13.678_1126853.845_0.080_0.065_10380899.590_0.92_79.93_13.512_13.821
05_BL0902-3	2977	DGDG(16:0_17:0)+HCOO	DGDG	(16:0_17:0)	M+HCOO	C49 H91 O17	951.627	18.012	141716	141716	141716	N	1	MS2	951.627	951.626	0.00098647	1.03661	34.2898	0.239175	57.1497	6	A	M-FA-FA2+H2O-GAL-H(235.082014):MS2,FA(16:0)-H(255.232808):MS2,FA(17:0)-H(269.248983):MS2,FA(17:0)-H [isotope](270.252641):MS2,M-FA1-FA2-H(379.123386):MS2,M-FA1-FA2+H2O-H(397.135109):MS2,M-FA1-FA2+2H2O-H(415.145664):MS2	18.003	986600	1	0.96	218320	SI	218300	0	0	18.003_218321.428_17.823_18.211_986617.256_0.96_218320.43_17.860_0.000_18.168_0.000
05_BL0902-3	2525	DGDG(16:0_17:1)+HCOO	DGDG	(16:0_17:1)	M+HCOO	C49 H89 O17	949.611	16.2285	781495	781495	781495	N	1	MS2	949.61	949.611	5.847e-05	0.0615726	40.3488	0.146186	67.248	6	A	M-FA-FA2+H2O-GAL-H(235.082149):MS2,FA(16:0)-H(255.233058):MS2,FA(16:0)-H [isotope](256.236422):MS2,FA(17:1)-H(267.233202):MS2,FA(17:1)-H [isotope](268.236736):MS2,M-FA1-FA2-H(379.125017):MS2,M-FA1-FA2+H2O-H(397.135417):MS2,M-FA1-FA2+H2O-H [isotope](398.138212):MS2,M-FA1-FA2+2H2O-H(415.146217):MS2	16.199	6726000	1	0.99	1.11056e+06	SI	1111000	0	0	16.199_1110560.101_15.989_16.370_6726031.277_0.99_1110559.10_15.989_0.000_16.355_0.000
05_BL0902-3	2145	DGDG(16:0_17:2)+HCOO	DGDG	(16:0_17:2)	M+HCOO	C49 H87 O17	947.596	14.6704	1.00395e+06	1.00395e+06	1.00395e+06	N	1	MS2	947.595	947.595	0.00067447	0.71177	39.2351	0.319561	65.3919	6	A	M-FA-FA2+H2O-GAL-H(235.08212):MS2,FA(16:0)-H(255.233134):MS2,FA(16:0)-H [isotope](256.236495):MS2,FA(17:2)-H(265.217638):MS2,FA(17:2)-H [isotope](266.220731):MS2,M-FA1-FA2-H(379.125106):MS2,M-FA1-FA2+H2O-H(397.135209):MS2,M-FA1-FA2+H2O-H [isotope](398.138389):MS2,M-FA1-FA2+2H2O-H(415.146406):MS2	14.653	9049000	1	0.99	1.10319e+06	SI	1103000	0	0	14.653_1103188.306_14.455_14.847_9048984.015_0.99_1103187.31_14.455_0.000_14.838_0.000
05_BL0902-3	1883	DGDG(16:0_17:3)+HCOO	DGDG	(16:0_17:3)	M+HCOO	C49 H85 O17	945.58	13.5404	1.38469e+06	1.38469e+06	1.38469e+06	N	1	MS2	945.579	945.579	0.00046847	0.495432	38.897	0.314385	64.8283	6	A	M-FA-FA2+H2O-GAL-H(235.082235):MS2,FA(16:0)-H(255.23319):MS2,FA(16:0)-H [isotope](256.236422):MS2,FA(17:3)-H(263.201945):MS2,FA(17:3)-H [isotope](264.205374):MS2,M-FA1-FA2-H(379.125236):MS2,M-FA1-FA2+H2O-H(397.135195):MS2,M-FA1-FA2+H2O-H [isotope](398.138352):MS2,M-FA1-FA2+2H2O-H(415.146284):MS2	13.514	13470000	1	0.89	1.50684e+06	SI	1507000	0	0	13.514_1506843.974_12.943_13.807_13473998.537_0.89_1506842.97_12.984_0.000_13.793_0.000
05_BL0902-3	3204	DGDG(16:0_18:0)+HCOO	DGDG	(16:0_18:0)	M+HCOO	C50 H93 O17	965.643	18.9222	332956	332956	332956	N	1	MS2	965.642	965.642	0.00071147	0.736784	81.3926	0.801616	90.4362	9	A	M-FA-FA2+H2O-GAL-H(235.082165):MS2,FA(16:0)-H(255.233191):MS2,FA(16:0)-H [isotope](256.236514):MS2,FA(18:0)-H(283.264681):MS2,FA(18:0)-H [isotope](284.267716):MS2,M-FA1-FA2-H(379.125025):MS2,M-FA1-FA2-H [isotope](380.128172):MS2,M-FA1-FA2+H2O-H(397.135629):MS2,M-FA1-FA2+H2O-H [isotope](398.139075):MS2,M-FA1-FA2+2H2O-H(415.145924):MS2,DGMG(16:0)-H2O-H(635.36434):MS2,DGMG(16:0)-H(653.375076):MS2,DG…	18.935	2417000	1	0.98	423444	SI	423400	0	0	18.935_423445.272_18.752_19.110_2417091.651_0.98_423444.27_18.803_0.000_19.084_0.000
05_BL0902-3	2770	DGDG(16:0_18:1)+HCOO	DGDG	(16:0_18:1)	M+HCOO	C50 H91 O17	963.627	17.2141	5.56247e+06	5.56247e+06	5.56247e+06	N	1	MS2	963.627	963.626	0.00114247	1.18559	38.939	0.235017	64.8983	6	A	M-FA-FA2+H2O-GAL-H(235.082058):MS2,FA(16:0)-H(255.232765):MS2,FA(16:0)-H [isotope](256.236258):MS2,FA(18:1)-H(281.248465):MS2,FA(18:1)-H [isotope](282.251923):MS2,M-FA1-FA2-H(379.124391):MS2,M-FA1-FA2+H2O-H(397.134909):MS2,M-FA1-FA2+H2O-H [isotope](398.138604):MS2,M-FA1-FA2+2H2O-H(415.145566):MS2	17.177	53020000	1	0.99	21744.8	SI	7106000	0	0	17.177_7105537.180_16.912_17.416_53015824.429_0.99_21744.76_16.935_326.755_17.408_326.755
05_BL0902-3	2356	DGDG(16:0_18:2)+HCOO	DGDG	(16:0_18:2)	M+HCOO	C50 H89 O17	961.611	15.6078	25886772	25886772	25886772	N	1	MS2	961.611	961.611	0.00076047	0.790829	39.5218	0.341426	65.8697	6	A	M-FA-FA2+H2O-GAL-H(235.082185):MS2,FA(16:0)-H(255.233061):MS2,FA(16:0)-H [isotope](256.236408):MS2,FA(18:2)-H(279.233202):MS2,FA(18:2)-H [isotope](280.236609):MS2,M-FA1-FA2-H(379.124923):MS2,M-FA1-FA2+H2O-H(397.135301):MS2,M-FA1-FA2+H2O-H [isotope](398.138914):MS2,M-FA1-FA2+2H2O-H(415.145973):MS2	15.658	253400000	1	0.99	282.41	SI	33440000	0	0	15.658_33443797.323_15.297_15.878_253405366.153_0.99_282.41_15.461_118005.267_15.841_118005.267
05_BL0902-3	2374	DGDG(16:0_18:2)-H	DGDG	(16:0_18:2)	M-H	C49 H87 O15	915.605	15.6951	449002	449002	449002	N	1	MS2	915.605	915.605	0.00019647	0.21458	37.5991	0.25412	62.6651	6	A	M-FA-FA2+H2O-GAL-H(235.08202):MS2,FA(16:0)-H(255.232807):MS2,FA(16:0)-H [isotope](256.236254):MS2,FA(18:2)-H(279.232922):MS2,FA(18:2)-H [isotope](280.236334):MS2,M-FA1-FA2-H(379.12491):MS2,M-FA1-FA2+H2O-H(397.135031):MS2,M-FA1-FA2+H2O-H [isotope](398.138469):MS2,M-FA1-FA2+2H2O-H(415.145853):MS2	15.691	3466000	1	0.75	474033	SI	474000	0	0	15.691_474033.794_15.438_15.866_3465688.420_0.75_474032.79_15.479_0.000_15.839_0.000
05_BL0902-3	2094	DGDG(16:0_18:3)+HCOO	DGDG	(16:0_18:3)	M+HCOO	C50 H87 O17	959.596	14.4855	50804076	50804076	50804076	N	1	MS2	959.595	959.595	0.00079847	0.832091	39.7704	0.200937	66.284	6	A	M-FA-FA2+H2O-GAL-H(235.081654):MS2,FA(16:0)-H(255.232657):MS2,FA(16:0)-H [isotope](256.236172):MS2,FA(18:3)-H(277.217074):MS2,FA(18:3)-H [isotope](278.220574):MS2,M-FA1-FA2-H(379.124422):MS2,M-FA1-FA2+H2O-H(397.134937):MS2,M-FA1-FA2+H2O-H [isotope](398.138844):MS2,M-FA1-FA2+2H2O-H(415.145682):MS2,M-FA1-FA2+2H2O-H [isotope](416.148348):MS2	14.501	484000000	1	0.96	271.33	SI	59180000	0	0	14.501_59179035.216_14.057_14.697_484047217.908_0.96_271.33_14.118_217302.778_14.687_217302.778
05_BL0902-3	2098	DGDG(16:0_18:3)-H	DGDG	(16:0_18:3)	M-H	C49 H85 O15	913.59	14.5015	813325	813325	813325	N	1	MS2	913.589	913.589	0.00010447	0.114351	37.9109	0.216984	63.1849	6	A	M-FA-FA2+H2O-GAL-H(235.081965):MS2,FA(16:0)-H(255.232835):MS2,FA(16:0)-H [isotope](256.236357):MS2,FA(18:3)-H(277.217211):MS2,FA(18:3)-H [isotope](278.220579):MS2,M-FA1-FA2-H(379.124598):MS2,M-FA1-FA2+H2O-H(397.134969):MS2,M-FA1-FA2+H2O-H [isotope](398.138046):MS2,M-FA1-FA2+2H2O-H(415.145724):MS2	14.493	6548000	1	0.93	863719	SI	863700	0	0	14.493_863720.373_14.122_14.670_6548348.749_0.93_863719.37_14.152_0.000_14.661_0.000
05_BL0902-3	1804	DGDG(16:0_18:4)+HCOO	DGDG	(16:0_18:4)	M+HCOO	C50 H85 O17	957.58	13.1267	1.96435e+06	1.96435e+06	1.96435e+06	N	1	MS2	957.58	957.579	0.00089847	0.938272	37.6837	0.304942	62.8061	6	A	M-FA-FA2+H2O-GAL-H(235.082057):MS2,FA(16:0)-H(255.232781):MS2,FA(16:0)-H [isotope](256.236397):MS2,FA(18:4)-H(275.20146):MS2,FA(18:4)-H [isotope](276.204885):MS2,M-FA1-FA2-H(379.124784):MS2,M-FA1-FA2+H2O-H(397.134949):MS2,M-FA1-FA2+H2O-H [isotope](398.138419):MS2,M-FA1-FA2+2H2O-H(415.145983):MS2	13.098	26010000	0.92	0.93	169.83	BS	2018000	0.102	0.099	13.098_2018365.857_0.102_0.099_26005073.134_0.93_169.83_12.884_13.362;12.561_7617308.597_0.113_0.059_83597023.940_0.89_350.79_12.135_12.862
05_BL0902-3	2997	DGDG(16:0_19:1)+HCOO	DGDG	(16:0_19:1)	M+HCOO	C51 H93 O17	977.643	18.1228	226437	226437	226437	N	1	MS2	977.642	977.642	0.00109547	1.12052	36.6545	0.156183	61.0908	6	A	M-FA-FA2+H2O-GAL-H(235.082465):MS2,FA(16:0)-H(255.232972):MS2,FA(16:0)-H [isotope](256.237219):MS2,FA(19:1)-H(295.264173):MS2,FA(19:1)-H [isotope](296.26766):MS2,M-FA1-FA2-H(379.124979):MS2,M-FA1-FA2+H2O-H(397.135088):MS2,M-FA1-FA2+H2O-H [isotope](398.13827):MS2,M-FA1-FA2+2H2O-H(415.146127):MS2	18.114	1889000	1	0.89	248294	SI	248300	0	0	18.114_248294.728_17.896_18.373_1889398.740_0.89_248293.73_17.896_0.000_18.343_0.000
05_BL0902-3	2594	DGDG(16:0_19:2)+HCOO	DGDG	(16:0_19:2)	M+HCOO	C51 H91 O17	975.628	16.5237	188477	188477	188477	N	1	MS2	975.627	975.626	0.00144047	1.47646	36.1593	0.615074	60.2655	6	A	M-FA-FA2+H2O-GAL-H(235.08266):MS2,FA(16:0)-H(255.233091):MS2,FA(16:0)-H [isotope](256.237185):MS2,FA(19:2)-H(293.249021):MS2,FA(19:2)-H [isotope](294.251807):MS2,M-FA1-FA2-H(379.124513):MS2,M-FA1-FA2+H2O-H(397.135452):MS2,M-FA1-FA2+2H2O-H(415.146316):MS2	16.558	2934000	1	0.95	338076	SI	338100	0	0	16.558_338076.743_16.253_16.921_2933982.327_0.95_338075.74_16.284_0.000_16.910_0.000
05_BL0902-3	2837	DGDG(16:0_20:2)+HCOO	DGDG	(16:0_20:2)	M+HCOO	C52 H93 O17	989.643	17.4362	198082	198082	198082	N	1	MS2	989.642	989.642	0.00083847	0.847246	33.3542	0.685252	55.5904	6	A	M-FA-FA2+H2O-GAL-H(235.082703):MS2,FA(16:0)-H(255.233031):MS2,FA(20:2)-H(307.264516):MS2,FA(20:2)-H [isotope](308.268602):MS2,M-FA1-FA2-H(379.126271):MS2,M-FA1-FA2+H2O-H(397.135336):MS2,M-FA1-FA2+2H2O-H(415.145275):MS2	17.449	1452000	1	0.92	229834	SI	229800	0	0	17.449_229834.732_17.202_17.571_1452267.754_0.92_229833.73_17.219_0.000_17.565_0.000
05_BL0902-3	2515	DGDG(16:0_20:3)+HCOO	DGDG	(16:0_20:3)	M+HCOO	C52 H91 O17	987.627	16.1926	487785	487785	487785	N	1	MS2	987.626	987.626	0.00075347	0.76291	39.9427	0.46104	66.5712	6	A	M-FA-FA2+H2O-GAL-H(235.082059):MS2,FA(16:0)-H(255.232944):MS2,FA(16:0)-H [isotope](256.236429):MS2,FA(20:3)-H(305.248863):MS2,FA(20:3)-H [isotope](306.252471):MS2,M-FA1-FA2-H(379.124215):MS2,M-FA1-FA2+H2O-H(397.135205):MS2,M-FA1-FA2+H2O-H [isotope](398.138317):MS2,M-FA1-FA2+2H2O-H(415.146229):MS2	16.177	4062000	1	0.9	620211	SI	620200	0	0	16.177_620212.168_16.013_16.298_4061822.353_0.90_620211.17_16.013_0.000_16.293_0.000
05_BL0902-3	1839	DGDG(16:1_16:1)+HCOO	DGDG	(16:1_16:1)	M+HCOO	C48 H85 O17	933.58	13.3066	315642	315642	315642	N	1	MS2	933.58	933.579	0.00099347	1.06415	35.8298	0.390435	59.7164	6	A	M-FA-FA2+H2O-GAL-H(235.082027):MS2,FA(16:1)-H(253.217428):MS2,FA(16:1)-H [isotope](254.220476):MS2,M-FA1-FA2-H(379.124457):MS2,M-FA1-FA2+H2O-H(397.1352):MS2,M-FA1-FA2+2H2O-H(415.145299):MS2	13.289	3678000	0.92	0.95	373366	BS	333000	0.086	0.086	13.289_333041.097_0.086_0.086_3678097.746_0.95_373366.21_13.055_13.419;13.475_154990.786_0.089_0.084_1720100.263_0.84_0.42_13.419_13.512;13.678_1126853.845_0.080_0.065_10380899.590_0.92_79.93_13.512_13.821
05_BL0902-3	1504	DGDG(16:1_17:3)+HCOO	DGDG	(16:1_17:3)	M+HCOO	C49 H83 O17	943.565	11.5333	211296	211296	211296	N	1	MS2	943.564	943.564	0.00094247	0.998841	24.0254	0.0182277	60.0635	4	A	FA(16:1)-H(253.217225):MS2,FA(16:1)-H [isotope](254.220032):MS2,FA(17:3)-H(263.201511):MS2,M-FA1-FA2+H2O-H(397.135135):MS2,M-FA1-FA2+2H2O-H(415.143706):MS2	11.527	1568000	1	0.49	217577	SI	217600	0	0	11.527_217577.524_11.266_11.670_1568273.237_0.49_217576.52_11.266_0.000_11.663_0.000
05_BL0902-3	1932	DGDG(16:1_18:2)+HCOO	DGDG	(16:1_18:2)	M+HCOO	C50 H87 O17	959.596	13.7509	1.70975e+06	1.70975e+06	1.70975e+06	N	1	MS2	959.595	959.595	0.00065147	0.678901	39.2442	0.533702	65.407	6	A	M-FA-FA2+H2O-GAL-H(235.08211):MS2,FA(16:1)-H(253.217376):MS2,FA(16:1)-H [isotope](254.220864):MS2,FA(18:2)-H(279.233102):MS2,FA(18:2)-H [isotope](280.236459):MS2,M-FA1-FA2-H(379.124779):MS2,M-FA1-FA2+H2O-H(397.135188):MS2,M-FA1-FA2+H2O-H [isotope](398.138383):MS2,M-FA1-FA2+2H2O-H(415.145717):MS2	13.763	15620000	1	0.99	390.67	SI	1972000	0	0	13.763_1972224.433_13.593_13.902_15615513.724_0.99_390.67_13.593_5035.451_13.897_5035.451
05_BL0902-3	1686	DGDG(16:1_18:3)+HCOO	DGDG	(16:1_18:3)	M+HCOO	C50 H85 O17	957.58	12.5676	7.79454e+06	7.79454e+06	7.79454e+06	N	1	MS2	957.58	957.579	0.00098147	1.02495	40.0793	0.254113	66.7988	6	A	M-FA-FA2+H2O-GAL-H(235.082295):MS2,FA(16:1)-H(253.217462):MS2,FA(16:1)-H [isotope](254.220699):MS2,FA(18:3)-H(277.217491):MS2,FA(18:3)-H [isotope](278.22067):MS2,M-FA1-FA2-H(379.124791):MS2,M-FA1-FA2+H2O-H(397.135274):MS2,M-FA1-FA2+H2O-H [isotope](398.138708):MS2,M-FA1-FA2+2H2O-H(415.145633):MS2	12.55	81700000	1	0.88	250.59	SI	8780000	0	0	12.550_8779570.398_12.079_12.846_81697483.194_0.88_250.59_12.151_34896.508_12.834_34896.508
05_BL0902-3	1402	DGDG(16:1_18:4)+HCOO	DGDG	(16:1_18:4)	M+HCOO	C50 H83 O17	955.564	11.0593	207613	207613	207613	N	1	MS2	955.564	955.564	0.00053947	0.564557	35.2709	0.0938548	58.7848	6	A	M-FA-FA2+H2O-GAL-H(235.082473):MS2,FA(16:1)-H(253.217695):MS2,FA(16:1)-H [isotope](254.221251):MS2,FA(18:4)-H(275.201736):MS2,FA(18:4)-H [isotope](276.205564):MS2,M-FA1-FA2-H(379.123113):MS2,M-FA1-FA2+H2O-H(397.135502):MS2,M-FA1-FA2+2H2O-H(415.146763):MS2	11.091	2961000	1	0.48	323467	SI	323500	0	0	11.091_323467.977_10.716_11.222_2960529.493_0.48_323466.98_10.716_0.000_11.214_0.000
05_BL0902-3	1915	DGDG(17:1_18:3)+HCOO	DGDG	(17:1_18:3)	M+HCOO	C51 H87 O17	971.596	13.681	173894	173894	173894	N	1	MS2	971.595	971.595	0.00090947	0.936059	32.1583	0.396057	64.3167	5	A	FA(17:1)-H(267.233052):MS2,FA(17:1)-H [isotope](268.236069):MS2,FA(18:3)-H(277.217193):MS2,FA(18:3)-H [isotope](278.221352):MS2,M-FA1-FA2-H(379.124691):MS2,M-FA1-FA2+H2O-H(397.135076):MS2,M-FA1-FA2+2H2O-H(415.145535):MS2	13.666	1472000	1	0.86	186989	SI	187000	0	0	13.666_186990.091_13.457_13.837_1471567.563_0.86_186989.09_13.492_0.000_13.831_0.000
05_BL0902-3	2431	DGDG(18:1_18:2)+HCOO	DGDG	(18:1_18:2)	M+HCOO	C52 H91 O17	987.625	15.8939	197015	197015	197015	N	1	MS2	987.625	987.626	-0.00094353	-0.955353	22.4192	0.759724	56.0479	4	A	FA(18:2)-H(279.233185):MS2,FA(18:2)-H [isotope](280.235746):MS2,FA(18:1)-H(281.248884):MS2,M-FA1-FA2+H2O-H(397.134764):MS2,M-FA1-FA2+2H2O-H(415.145209):MS2	15.884	1077000	1	0.77	194585	SI	194600	0	0	15.884_194585.932_15.635_16.002_1077457.204_0.77_194584.93_15.669_0.000_15.973_0.000
05_BL0902-3	2161	DGDG(18:1_18:3)+HCOO	DGDG	(18:1_18:3)	M+HCOO	C52 H89 O17	985.611	14.7636	182110	182110	182110	N	1	MS2	985.611	985.611	0.00069147	0.701565	31.2871	0.489483	62.5743	5	A	M-FA-FA2+H2O-GAL-H(235.081641):MS2,FA(18:3)-H(277.21747):MS2,FA(18:3)-H [isotope](278.220689):MS2,FA(18:1)-H(281.248719):MS2,FA(18:1)-H [isotope](282.252111):MS2,M-FA1-FA2+H2O-H(397.135345):MS2,M-FA1-FA2+2H2O-H(415.146223):MS2	14.764	1755000	1	0.97	206027	SI	206000	0	0	14.764_206028.399_14.497_14.996_1755265.544_0.97_206027.40_14.497_0.000_14.949_0.000
05_BL0902-3	2052	DGDG(18:2_18:2)+HCOO	DGDG	(18:2_18:2)	M+HCOO	C52 H89 O17	985.611	14.3127	350370	350370	350370	N	1	MS2	985.611	985.611	0.00075447	0.765485	38.3934	0.940359	63.989	6	A	M-FA-FA2+H2O-GAL-H(235.082186):MS2,FA(18:2)-H(279.232831):MS2,FA(18:2)-H [isotope](280.23635):MS2,M-FA1-FA2-H(379.124467):MS2,M-FA1-FA2+H2O-H(397.135224):MS2,M-FA1-FA2+H2O-H [isotope](398.137969):MS2,M-FA1-FA2+2H2O-H(415.145838):MS2	14.274	2744000	1	0.99	383187	SI	383200	0	0	14.274_383187.617_14.082_14.458_2744096.575_0.99_383186.62_14.082_0.000_14.452_0.000
05_BL0902-3	1792	DGDG(18:2_18:3)+HCOO	DGDG	(18:2_18:3)	M+HCOO	C52 H87 O17	983.596	13.0765	547888	547888	547888	N	1	MS2	983.595	983.595	0.00085447	0.868721	39.4917	0.6205	65.8195	6	A	M-FA-FA2+H2O-GAL-H(235.082207):MS2,FA(18:3)-H(277.217566):MS2,FA(18:3)-H [isotope](278.221032):MS2,FA(18:2)-H(279.233247):MS2,FA(18:2)-H [isotope](280.236603):MS2,M-FA1-FA2-H(379.125157):MS2,M-FA1-FA2+H2O-H(397.135668):MS2,M-FA1-FA2+H2O-H [isotope](398.139046):MS2,M-FA1-FA2+2H2O-H(415.146225):MS2	13.085	5308000	1	0.98	622172	SI	622200	0	0	13.085_622173.081_12.891_13.464_5308398.530_0.98_622172.08_12.891_0.167_13.434_0.167;12.230_6095.519_11.992_12.274_8514.220_0.63_6094.52_12.170_0.000_12.274_0.000;12.862_64774.274_12.616_12.891_402406.820_0.68_64773.27_12.616_0.000_12.891_0.000;13.538_11521.996_13.464_13.977_18683.256_0.65_11521.00_13.464_0.000_13.679_0.000
05_BL0902-3	1575	DGDG(18:3_18:3)+HCOO	DGDG	(18:3_18:3)	M+HCOO	C52 H85 O17	981.58	11.9337	191474	191474	191474	N	1	MS2	981.579	981.579	0.00081847	0.83383	39.6344	0.0296445	66.0573	6	A	M-FA-FA2+H2O-GAL-H(235.082034):MS2,FA(18:3)-H(277.217303):MS2,FA(18:3)-H [isotope](278.220952):MS2,M-FA1-FA2-H(379.124721):MS2,M-FA1-FA2+H2O-H(397.134976):MS2,M-FA1-FA2+2H2O-H(415.146344):MS2	11.895	2436000	1	0.84	146.32	SI	258900	0	0	11.895_258897.399_11.700_12.073_2435758.633_0.84_146.32_11.700_1757.390_12.062_1757.390;11.623_74125.911_11.367_11.700_578238.110_0.66_74124.91_11.367_0.000_11.700_0.000
05_BL0902-3	431	DGMG(16:0)+HCOO	DGMG	(16:0)	M+HCOO	C32 H59 O16	699.382	3.45272	919870	919870	919870	N	1	MS2	699.381	699.381	0.00065347	0.934355	12.6022	0.27125	31.5055	4	B	M-FA(16:0)-GAL-H(235.082068):MS2,FA(16:0)-H(255.233092):MS2,FA(16:0)-H [isotope](256.236611):MS2,M-FA(16:0)-H(397.134903):MS2,M-FA(16:0)+H2O-H(415.145595):MS2	3.462	12840000	1	0.65	1.20473e+06	SI	1205000	0	0	3.462_1204735.557_3.179_3.637_12843664.341_0.65_1204734.56_3.179_0.000_3.637_0.000;3.721_178560.150_3.637_3.924_1276375.748_0.81_178559.15_3.637_0.000_3.919_0.000
05_BL0902-3	2201	MGDG(14:0_18:2)+HCOO	MGDG	(14:0_18:2)	M+HCOO	C42 H75 O12	771.527	14.9226	483703	483703	483703	N	1	MS2	771.527	771.526	0.00089247	1.15676	16.5113	0.270109	55.0375	3	A	FA(14:0)-H(227.201282):MS2,M-FA1-FA2+2H2O-H(253.093377):MS2,FA(18:2)-H(279.232897):MS2	14.919	4168000	0.93	0.94	2.28	BS	485800	0.076	0.058	14.741_489249.387_0.072_0.072_4522742.529_0.91_588012.39_14.564_14.822;14.919_485809.346_0.076_0.058_4168378.562_0.94_2.28_14.822_14.999;15.119_2688065.007_0.059_0.066_21469167.374_0.98_49.50_14.999_15.279
05_BL0902-3	1914	MGDG(14:0_18:3)+HCOO	MGDG	(14:0_18:3)	M+HCOO	C42 H73 O12	769.512	13.6787	631856	631856	631856	N	1	MS2	769.511	769.511	0.00093847	1.21957	12.4343	0.612051	62.1714	2	B	FA(14:0)-H(227.201309):MS2,FA(18:3)-H(277.217352):MS2	13.683	5485000	1	0.94	683137	SI	683100	0	0	13.683_683138.486_13.457_13.867_5485421.179_0.94_683137.49_13.457_0.000_13.861_0.000
05_BL0902-3	3061	MGDG(16:0_16:0)+HCOO	MGDG	(16:0_16:0)	M+HCOO	C42 H79 O12	775.559	18.3982	5541293	5541293	5541293	N	1	MS2	775.558	775.558	0.00093347	1.20361	39.0415	0.757951	97.6038	4	A	M-FA1-FA2+H2O-H(235.082375):MS2,M-FA1-FA2+2H2O-H(253.092976):MS2,FA(16:0)-H(255.23317):MS2,FA(16:0)-H [isotope](256.236392):MS2	18.393	34450000	1	1	362.1	SI	5548000	0	0	18.393_5547575.684_18.112_18.652_34454701.342_1.00_362.10_18.138_15278.161_18.643_15278.161
05_BL0902-3	2612	MGDG(16:0_16:1)+HCOO	MGDG	(16:0_16:1)	M+HCOO	C42 H77 O12	773.543	16.5804	15024915	15024915	15024915	N	1	MS2	773.542	773.542	0.00081947	1.05937	38.5944	0.366007	96.4861	4	A	M-FA1-FA2+H2O-H(235.08236):MS2,M-FA1-FA2+2H2O-H(253.092864):MS2,FA(16:1)-H(253.217332):MS2,FA(16:1)-H [isotope](254.220847):MS2,FA(16:0)-H(255.23299):MS2,FA(16:0)-H [isotope](256.236332):MS2	16.617	140000000	1	0.98	961.53	SI	19860000	0	0	16.617_19862051.838_16.433_16.805_139997118.164_0.98_961.53_16.433_20635.303_16.790_20635.303
05_BL0902-3	2253	MGDG(16:0_16:2)+HCOO	MGDG	(16:0_16:2)	M+HCOO	C42 H75 O12	771.527	15.1232	2.88291e+06	2.88291e+06	2.88291e+06	N	1	MS2	771.527	771.526	0.00109047	1.41339	38.5873	0.470622	96.4683	4	A	M-FA1-FA2+H2O-H(235.082713):MS2,FA(16:2)-H(251.201746):MS2,FA(16:2)-H [isotope](252.203376):MS2,M-FA1-FA2+2H2O-H(253.093053):MS2,FA(16:0)-H(255.232979):MS2,FA(16:0)-H [isotope](256.236372):MS2	15.119	21470000	0.93	0.98	49.5	BS	2688000	0.059	0.066	14.741_489249.387_0.072_0.072_4522742.529_0.91_588012.39_14.564_14.822;14.919_485809.346_0.076_0.058_4168378.562_0.94_2.28_14.822_14.999;15.119_2688065.007_0.059_0.066_21469167.374_0.98_49.50_14.999_15.279
05_BL0902-3	3315	MGDG(16:0_17:0)+HCOO	MGDG	(16:0_17:0)	M+HCOO	C43 H81 O12	789.574	19.3401	192754	192754	192754	N	1	MS2	789.573	789.573	0.00037347	0.473002	9.72507	1.15676	48.6254	2	B	FA(16:0)-H(255.233128):MS2,FA(17:0)-H(269.248723):MS2	19.343	813000	0.88	0.98	272045	BS	239400	0.026	0.027	19.343_239393.000_0.026_0.027_813026.150_0.98_272044.95_19.208_19.411;19.458_107944.761_0.044_0.039_573236.695_0.77_114474.59_19.411_19.540
05_BL0902-3	2880	MGDG(16:0_17:1)+HCOO	MGDG	(16:0_17:1)	M+HCOO	C43 H79 O12	787.558	17.5784	4.33632e+06	4.33632e+06	4.33632e+06	N	1	MS2	787.558	787.558	0.00076047	0.965605	36.1742	0.252011	90.4355	4	A	M-FA1-FA2+H2O-H(235.082246):MS2,M-FA1-FA2+2H2O-H(253.092988):MS2,FA(16:0)-H(255.232872):MS2,FA(16:0)-H [isotope](256.236387):MS2,FA(17:1)-H(267.233177):MS2,FA(17:1)-H [isotope](268.236942):MS2	17.603	30380000	1	0.96	126242	SI	4831000	0	0	17.603_4831138.142_17.373_17.785_30382744.176_0.96_126242.06_17.412_38.269_17.779_38.269
05_BL0902-3	2494	MGDG(16:0_17:2)+HCOO	MGDG	(16:0_17:2)	M+HCOO	C43 H77 O12	785.543	16.1092	2.99378e+06	2.99378e+06	2.99378e+06	N	1	MS2	785.542	785.542	0.00064147	0.816595	38.539	0.287742	96.3474	4	A	M-FA1-FA2+H2O-H(235.082512):MS2,M-FA1-FA2+2H2O-H(253.093045):MS2,FA(16:0)-H(255.232789):MS2,FA(16:0)-H [isotope](256.236003):MS2,FA(17:2)-H(265.217499):MS2,FA(17:2)-H [isotope](266.220672):MS2	16.088	22280000	1	0.98	3.45967e+06	SI	3460000	0	0	16.088_3459674.286_15.924_16.240_22277647.359_0.98_3459673.29_15.939_0.000_16.235_0.000
05_BL0902-3	2195	MGDG(16:0_17:3)+HCOO	MGDG	(16:0_17:3)	M+HCOO	C43 H75 O12	783.527	14.8991	2.02208e+06	2.02208e+06	2.02208e+06	N	1	MS2	783.527	783.526	0.00075347	0.961639	36.2252	0.696502	90.5629	4	A	M-FA1-FA2+H2O-H(235.081874):MS2,M-FA1-FA2+2H2O-H(253.092875):MS2,FA(16:0)-H(255.232886):MS2,FA(16:0)-H [isotope](256.236684):MS2,FA(17:3)-H(263.201566):MS2,FA(17:3)-H [isotope](264.20542):MS2	14.928	22200000	1	0.99	2.98784e+06	SI	2988000	0	0	14.928_2987837.274_14.625_15.191_22198462.223_0.99_2987836.27_14.652_0.000_15.182_0.000
05_BL0902-3	3529	MGDG(16:0_18:0)+HCOO	MGDG	(16:0_18:0)	M+HCOO	C44 H83 O12	803.59	20.2	262884	262884	262884	N	1	MS2	803.59	803.589	0.00115447	1.43664	17.2088	2.14845	57.3625	3	A	M-FA1-FA2+2H2O-H(253.09387):MS2,FA(16:0)-H(255.233156):MS2,FA(18:0)-H(283.264304):MS2	20.224	2020000	0.92	0.93	436991	BS	382300	0.041	0.042	20.224_382326.256_0.041_0.042_2019606.117_0.93_436991.16_20.097_20.286;20.337_272466.107_0.044_0.067_1926593.266_0.79_311258.13_20.286_20.485
05_BL0902-3	3102	MGDG(16:0_18:1)+HCOO	MGDG	(16:0_18:1)	M+HCOO	C44 H81 O12	801.574	18.5552	30964120	30964120	30964120	N	1	MS2	801.574	801.573	0.00086847	1.08346	36.9758	0.222421	92.4394	4	A	M-FA1-FA2+H2O-H(235.081282):MS2,M-FA1-FA2+2H2O-H(253.093263):MS2,FA(16:0)-H(255.232824):MS2,FA(16:0)-H [isotope](256.236485):MS2,FA(18:1)-H(281.248473):MS2,FA(18:1)-H [isotope](282.25164):MS2	18.527	288700000	1	0.99	6115.5	SI	48600000	0	0	18.527_48601691.274_18.312_18.732_288658718.507_0.99_6115.50_18.312_7945.997_18.725_7945.997
05_BL0902-3	2725	MGDG(16:0_18:2)+HCOO	MGDG	(16:0_18:2)	M+HCOO	C44 H79 O12	799.558	17.0465	108592368	108592368	108592368	N	1	MS2	799.558	799.558	0.00073247	0.916094	37.5994	0.0512664	93.9986	4	A	M-FA1-FA2+H2O-H(235.082512):MS2,M-FA1-FA2+2H2O-H(253.092827):MS2,FA(16:0)-H(255.232745):MS2,FA(16:0)-H [isotope](256.236087):MS2,FA(18:2)-H(279.232965):MS2,FA(18:2)-H [isotope](280.236442):MS2	17.06	760200000	1	0.99	433.27	SI	118800000	0	0	17.060_118816265.942_16.726_17.230_760196885.677_0.99_433.27_16.857_273601.345_17.222_273601.345
05_BL0902-3	2716	MGDG(16:0_18:2)-H	MGDG	(16:0_18:2)	M-H	C43 H77 O10	753.551	17.0022	282481	282481	282481	N	1	MS2	753.55	753.552	-0.00164353	-2.18105	38.5444	0.0069974	96.361	4	A	M-FA1-FA2+H2O-H(235.082066):MS2,M-FA1-FA2+2H2O-H(253.092853):MS2,FA(16:0)-H(255.232935):MS2,FA(16:0)-H [isotope](256.236472):MS2,FA(18:2)-H(279.233004):MS2,FA(18:2)-H [isotope](280.236311):MS2	17.056	1953000	1	0.81	426206	SI	426200	0	0	17.056_426207.409_16.825_17.207_1953349.965_0.81_426206.41_16.861_0.000_17.201_0.000
05_BL0902-3	2428	MGDG(16:0_18:3)+HCOO	MGDG	(16:0_18:3)	M+HCOO	C44 H77 O12	797.543	15.8871	181206304	181206304	181206304	N	1	MS2	797.542	797.542	0.00078947	0.989879	37.8198	0.366311	94.5495	4	A	M-FA1-FA2+H2O-H(235.082154):MS2,M-FA1-FA2+2H2O-H(253.092986):MS2,FA(16:0)-H(255.233178):MS2,FA(16:0)-H [isotope](256.236799):MS2,FA(18:3)-H(277.217575):MS2,FA(18:3)-H [isotope](278.22156):MS2	15.894	1216000000	0.94	0.99	635.88	BS	154400000	0.055	0.068	15.179_2030509.590_0.071_0.076_19012215.951_1.00_38.74_15.051_15.341;15.894_154434971.178_0.055_0.068_1216122354.864_0.99_635.88_15.562_16.115
05_BL0902-3	2441	MGDG(16:0_18:3)-H	MGDG	(16:0_18:3)	M-H	C43 H75 O10	751.535	15.9344	435367	435367	435367	N	1	MS2	751.535	751.537	-0.00124553	-1.65732	37.99	0.413629	94.9751	4	A	M-FA1-FA2+H2O-H(235.082593):MS2,M-FA1-FA2+2H2O-H(253.092863):MS2,FA(16:0)-H(255.233074):MS2,FA(16:0)-H [isotope](256.236323):MS2,FA(18:3)-H(277.21753):MS2,FA(18:3)-H [isotope](278.220762):MS2	15.915	3392000	1	0.81	623877	SI	623900	0	0	15.915_623878.271_15.701_16.064_3392339.726_0.81_623877.27_15.718_0.000_16.058_0.000
05_BL0902-3	2105	MGDG(16:0_18:4)+HCOO	MGDG	(16:0_18:4)	M+HCOO	C44 H75 O12	795.527	14.5243	2.1988e+06	2.1988e+06	2.1988e+06	N	1	MS2	795.527	795.526	0.00103647	1.30287	33.5563	0.55363	83.8908	4	A	M-FA1-FA2+H2O-H(235.081988):MS2,M-FA1-FA2+2H2O-H(253.092839):MS2,FA(16:0)-H(255.232818):MS2,FA(16:0)-H [isotope](256.236338):MS2,FA(18:4)-H(275.201452):MS2,FA(18:4)-H [isotope](276.205284):MS2	14.549	22740000	0.91	0.9	75.09	BS	2216000	0.077	0.084	14.549_2215875.609_0.077_0.084_22741404.125_0.90_75.09_14.371_14.695;13.991_8991666.717_0.084_0.059_82331871.896_0.95_582.07_13.586_14.371
05_BL0902-3	3342	MGDG(16:0_19:1)+HCOO	MGDG	(16:0_19:1)	M+HCOO	C45 H83 O12	815.59	19.4342	927341	927341	927341	N	1	MS2	815.59	815.589	0.00145247	1.78088	20.0059	1.46825	66.6862	3	A	M-FA1-FA2+2H2O-H(253.092793):MS2,FA(16:0)-H(255.232794):MS2,FA(19:1)-H(295.264157):MS2,FA(19:1)-H [isotope](296.267445):MS2	19.443	5900000	1	0.93	1.05404e+06	SI	1054000	0	0	19.443_1054042.204_19.235_19.602_5899697.821_0.93_1054041.20_19.269_0.000_19.596_0.000
05_BL0902-3	2967	MGDG(16:0_19:2)+HCOO	MGDG	(16:0_19:2)	M+HCOO	C45 H81 O12	813.575	17.9634	424104	424104	424104	N	1	MS2	813.574	813.573	0.00132547	1.62919	16.406	0.0184891	54.6868	3	A	M-FA1-FA2+2H2O-H(253.093232):MS2,FA(16:0)-H(255.232839):MS2,FA(19:2)-H(293.248706):MS2	17.921	5424000	1	0.94	55328.9	SI	712600	0	0	17.921_712649.633_17.539_18.186_5423974.114_0.94_55328.91_17.569_12.880_18.175_12.880
05_BL0902-3	2615	MGDG(16:0_19:3)+HCOO	MGDG	(16:0_19:3)	M+HCOO	C45 H79 O12	811.559	16.5871	161285	161285	161285	N	1	MS2	811.558	811.558	0.00099847	1.23031	6.94372	0.078866	34.7186	2	B	FA(16:0)-H(255.232691):MS2,FA(19:3)-H(291.233107):MS2	16.621	1825000	0.81	0.64	57411.8	BS	188900	0.088	0.063	16.621_188944.520_0.088_0.063_1824800.199_0.64_57411.82_16.448_16.726;16.432_2104.060_0.013_0.013_3468.373_0.94_4451.13_16.395_16.448
05_BL0902-3	3175	MGDG(16:0_20:2)+HCOO	MGDG	(16:0_20:2)	M+HCOO	C46 H83 O12	827.59	18.8093	273753	273753	273753	N	1	MS2	827.59	827.589	0.00142447	1.72123	9.83806	0.774164	49.1903	2	B	FA(16:0)-H(255.233025):MS2,FA(20:2)-H(307.264356):MS2,FA(20:2)-H [isotope](308.269002):MS2	18.774	2353000	0.79	0.92	405694	BS	377700	0.056	0.042	18.774_377676.805_0.056_0.042_2353222.204_0.92_405693.96_18.544_18.883;18.525_8166.133_0.013_0.014_14043.922_1.00_21177.78_18.484_18.544
05_BL0902-3	2865	MGDG(16:0_20:3)+HCOO	MGDG	(16:0_20:3)	M+HCOO	C46 H81 O12	825.574	17.531	1.05423e+06	1.05423e+06	1.05423e+06	N	1	MS2	825.574	825.573	0.00113047	1.36931	24.839	0.109315	82.7966	3	A	M-FA1-FA2+2H2O-H(253.092751):MS2,FA(16:0)-H(255.233011):MS2,FA(16:0)-H [isotope](256.236794):MS2,FA(20:3)-H(305.248773):MS2,FA(20:3)-H [isotope](306.252086):MS2	17.515	7594000	1	0.98	1.28325e+06	SI	1283000	0	0	17.515_1283253.773_17.373_17.860_7594102.800_0.98_1283252.77_17.373_0.000_17.726_0.000
05_BL0902-3	2157	MGDG(16:1_16:1)+HCOO	MGDG	(16:1_16:1)	M+HCOO	C42 H75 O12	771.527	14.7472	487634	487634	487634	N	1	MS2	771.526	771.526	0.00040947	0.530727	11.6692	0.0947055	58.3458	2	B	FA(16:1)-H(253.217562):MS2	14.741	4523000	0.93	0.91	588012	BS	489200	0.072	0.072	14.741_489249.387_0.072_0.072_4522742.529_0.91_588012.39_14.564_14.822;14.919_485809.346_0.076_0.058_4168378.562_0.94_2.28_14.822_14.999;15.119_2688065.007_0.059_0.066_21469167.374_0.98_49.50_14.999_15.279
05_BL0902-3	1810	MGDG(16:1_16:2)+HCOO	MGDG	(16:1_16:2)	M+HCOO	C42 H73 O12	769.512	13.1474	174872	174872	174872	N	1	MS2	769.511	769.511	0.00112147	1.45738	8.04078	0.0807342	40.2039	2	B	FA(16:2)-H(251.201344):MS2,FA(16:1)-H(253.217535):MS2	13.166	1539000	1	0.79	203133	SI	203100	0	0	13.166_203134.279_12.926_13.282_1538880.198_0.79_203133.28_12.952_0.767_13.282_0.767;13.380_42589.490_13.282_13.492_136865.140_0.72_42588.49_13.282_0.000_13.461_0.000
05_BL0902-3	1767	MGDG(16:1_17:3)+HCOO	MGDG	(16:1_17:3)	M+HCOO	C43 H73 O12	781.511	12.9417	166467	166467	166467	N	1	MS2	781.511	781.511	0.00073747	0.943646	9.44361	0.29016	47.218	2	B	FA(16:1)-H(253.217202):MS2,FA(17:3)-H(263.201987):MS2	12.939	1467000	0.95	0.95	178924	BS	155600	0.089	0.059	12.939_155639.460_0.089_0.059_1466779.638_0.95_178923.74_12.613_13.198;13.321_2087.003_0.163_0.182_45986.252_0.48_2557.86_13.198_13.464;13.582_14842.990_0.065_0.060_118643.731_0.78_22292.00_13.464_13.686
05_BL0902-3	2666	MGDG(16:1_18:1)+HCOO	MGDG	(16:1_18:1)	M+HCOO	C44 H79 O12	799.56	16.7801	406817	406817	406817	N	1	MS2	799.559	799.558	0.00180947	2.26309	17.4495	0.215168	58.165	3	A	M-FA1-FA2+2H2O-H(253.092163):MS2,FA(16:1)-H(253.216762):MS2,FA(18:1)-H(281.248406):MS2	17.06	760200000	1	0.99	433.27	SI	118800000	0	0	17.060_118816265.942_16.726_17.230_760196885.677_0.99_433.27_16.857_273601.345_17.222_273601.345
05_BL0902-3	2244	MGDG(16:1_18:2)+HCOO	MGDG	(16:1_18:2)	M+HCOO	C44 H77 O12	797.543	15.0927	382725	382725	382725	N	1	MS2	797.543	797.542	0.00105147	1.31839	11.6479	0.428021	58.2396	2	B	FA(16:1)-H(253.217257):MS2,FA(18:2)-H(279.232858):MS2	15.186	16880000	1	0.97	41.25	SI	2359000	0	0	14.960_145673.715_14.767_15.010_1011158.578_0.84_145672.72_14.767_0.000_15.010_0.000;13.998_400539.393_13.764_14.257_3119271.750_0.93_400538.39_13.764_0.000_14.257_0.000;14.550_92544.014_14.366_14.767_778225.548_0.97_1177.57_14.366_78.522_14.759_78.522;15.186_2358808.131_15.010_15.303_16883049.400_0.97_41.25_15.010_55828.354_15.261_55828.354
05_BL0902-3	1986	MGDG(16:1_18:3)+HCOO	MGDG	(16:1_18:3)	M+HCOO	C44 H75 O12	795.527	14.0192	8038313	8038313	8038313	N	1	MS2	795.527	795.526	0.00099147	1.24631	36.8221	0.0484895	92.0553	4	A	M-FA1-FA2+H2O-H(235.083222):MS2,M-FA1-FA2+2H2O-H(253.093224):MS2,FA(16:1)-H(253.217646):MS2,FA(16:1)-H [isotope](254.22084):MS2,FA(18:3)-H(277.217685):MS2,FA(18:3)-H [isotope](278.220893):MS2	13.996	84600000	1	0.94	476.63	SI	10920000	0	0	13.996_10923488.018_13.561_14.252_84600507.470_0.94_476.63_13.627_22870.280_14.241_22870.280
05_BL0902-3	1677	MGDG(16:1_18:4)+HCOO	MGDG	(16:1_18:4)	M+HCOO	C44 H73 O12	793.512	12.5315	233870	233870	233870	N	1	MS2	793.511	793.511	0.00124547	1.56957	10.212	0.314371	51.0601	2	B	FA(16:1)-H(253.217376):MS2,FA(18:4)-H(275.201157):MS2	12.547	2744000	1	0.76	265139	SI	265100	0	0	12.547_265140.039_12.251_12.766_2743816.550_0.76_265139.04_12.251_0.000_12.722_0.000
05_BL0902-3	2988	MGDG(17:0_18:2)+HCOO	MGDG	(17:0_18:2)	M+HCOO	C45 H81 O12	813.575	18.0558	219259	219259	219259	N	1	MS2	813.574	813.573	0.00121147	1.48907	7.35192	0.0738869	36.7596	2	B	FA(17:0)-H(269.248841):MS2,FA(18:2)-H(279.232715):MS2	17.921	5424000	1	0.94	55328.9	SI	712600	0	0	17.921_712649.633_17.539_18.186_5423974.114_0.94_55328.91_17.569_12.880_18.175_12.880
05_BL0902-3	2706	MGDG(17:0_18:3)+HCOO	MGDG	(17:0_18:3)	M+HCOO	C45 H79 O12	811.558	16.9502	166060	166060	166060	N	1	MS2	811.558	811.558	0.00060747	0.748523	6.51228	0.441968	32.5614	2	B	FA(17:0)-H(269.248952):MS2,FA(18:3)-H(277.217893):MS2	16.944	1266000	1	0.95	30720.3	SI	168100	0	0	16.944_168051.271_16.766_17.155_1266338.659_0.95_30720.33_16.766_5.470_17.149_5.470
05_BL0902-3	2233	MGDG(17:1_18:3)+HCOO	MGDG	(17:1_18:3)	M+HCOO	C45 H77 O12	809.543	15.0479	197393	197393	197393	N	1	MS2	809.543	809.542	0.00137947	1.70401	6.45508	0.0878775	32.2754	2	B	FA(17:1)-H(267.233019):MS2,FA(18:3)-H(277.217212):MS2	15.04	1279000	1	0.96	196900	SI	196900	0	0	15.040_196901.374_14.877_15.229_1279431.689_0.96_196900.37_14.894_0.000_15.223_0.000
05_BL0902-3	2759	MGDG(18:1_18:2)+HCOO	MGDG	(18:1_18:2)	M+HCOO	C46 H81 O12	825.575	17.1658	163240	163240	163240	N	1	MS2	825.574	825.573	0.00129047	1.56312	10.1519	0.474416	50.7596	2	B	FA(18:2)-H(279.233426):MS2,FA(18:1)-H(281.248646):MS2	17.214	2282000	1	0.96	336258	SI	336300	0	0	17.214_336258.528_17.019_17.329_2281524.536_0.96_336257.53_17.063_0.000_17.324_0.000
05_BL0902-3	2504	MGDG(18:1_18:3)+HCOO	MGDG	(18:1_18:3)	M+HCOO	C46 H79 O12	823.559	16.1452	290809	290809	290809	N	1	MS2	823.559	823.558	0.00136547	1.65801	16.2316	0.0692314	54.1053	3	A	M-FA1-FA2+2H2O-H(253.093101):MS2,FA(18:3)-H(277.217297):MS2,FA(18:1)-H(281.248577):MS2	16.09	3309000	1	0.96	411693	SI	411700	0	0	16.090_411693.525_15.905_16.356_3309388.812_0.96_411692.52_15.905_0.000_16.348_0.000
05_BL0902-3	2360	MGDG(18:2_18:2)+HCOO	MGDG	(18:2_18:2)	M+HCOO	C46 H79 O12	823.559	15.6198	236554	236554	236554	N	1	MS2	823.558	823.558	0.00113247	1.37509	9.66261	0.594613	48.3131	2	B	FA(18:2)-H(279.23298):MS2,FA(18:2)-H [isotope](280.237223):MS2	15.658	2407000	1	0.86	11268.4	SI	355900	0	0	15.658_355942.827_15.458_15.815_2406818.987_0.86_11268.39_15.526_31.585_15.809_31.585
05_BL0902-3	2099	MGDG(18:2_18:3)+HCOO	MGDG	(18:2_18:3)	M+HCOO	C46 H77 O12	821.543	14.5038	311059	311059	311059	N	1	MS2	821.542	821.542	0.00080147	0.975568	12.4563	0.148688	62.2815	2	B	FA(18:3)-H(277.217301):MS2,FA(18:2)-H(279.233208):MS2	14.47	2936000	1	0.78	59.04	SI	339600	0	0	14.470_339600.232_14.308_14.645_2935639.631_0.78_59.04_14.308_5655.800_14.640_5655.800
05_BL0902-3	1835	MGDG(18:3_18:3)+HCOO	MGDG	(18:3_18:3)	M+HCOO	C46 H75 O12	819.528	13.2943	195220	195220	195220	N	1	MS2	819.527	819.526	0.00117447	1.43311	10.3367	0.227676	51.6836	2	B	FA(18:3)-H(277.217467):MS2	13.268	1750000	1	0.75	326.62	SI	224400	0	0	13.268_224431.899_13.101_13.392_1749992.007_0.75_326.62_13.101_685.028_13.387_685.028
05_BL0902-3	483	MGMG(16:0)+HCOO	MGMG	(16:0)	M+HCOO	C26 H49 O11	537.328	3.95803	2.49658e+06	2.49658e+06	2.49658e+06	N	1	MS2	537.328	537.328	0.00033547	0.62433	25.826	0.157396	86.0867	3	B	M-FA(16:0)-H(235.081889):MS2,M-FA(16:0)+H2O-H(253.092936):MS2,FA(16:0)-H(255.233047):MS2	4.114	45710000	1	0.67	334.48	SI	3658000	0	0	4.114_3658371.347_3.805_4.313_45713074.437_0.67_334.48_3.805_10904.805_4.313_10904.805;4.400_674158.598_4.330_4.616_3949836.585_0.77_19.93_4.330_32211.299_4.605_32211.299
05_BL0902-3	397	MGMG(16:1)+HCOO	MGMG	(16:1)	M+HCOO	C26 H47 O11	535.313	3.1781	178767	178767	178767	N	1	MS2	535.312	535.312	0.00041047	0.766786	14.215	0.348715	71.0749	2	B	M-FA(16:1)+H2O-H(253.092895):MS2,FA(16:1)-H(253.217536):MS2	3.185	2234000	1	0.76	238227	SI	238200	0	0	3.185_238227.916_2.908_3.311_2234029.408_0.76_238226.92_2.908_0.029_3.311_0.029;2.412_3306.260_2.182_2.482_4576.748_0.98_3305.26_2.355_0.001_2.482_0.001;2.580_2971.166_2.493_2.666_4370.827_0.40_2970.17_2.493_0.000_2.591_0.000;2.752_2887.862_2.666_2.908_4258.831_0.74_2636.78_2.666_0.000_2.735_0.000;3.358_59885.901_3.311_3.600_279325.677_0.72_59884.90_3.311_0.000_3.507_0.000;3.640_4351.143_3.600_3.…
05_BL0902-3	3278	SQDG(17:5_23:2)+HCOO	SQDG	(17:5_23:2)	M+HCOO	C50 H81 O14 S1	937.535	19.2145	78739344	78739344	78739344	N	1	MS2	937.534	937.535	-0.00066553	-0.709873	8.55379	3.00005	42.7689	2	B	SQMG(17:5)-H2O-H(541.209506):MS2,SQMG(17:5)-H2O-H [isotope](542.21172):MS2,M-H(891.527082):MS2,M-H [isotope](892.530103):MS2,M+HCOO(937.532001):MS2	19.255	924300000	1	1	6264.24	SI	128400000	0	0	19.255_128362802.795_19.059_19.579_924339735.036_1.00_6264.24_19.083_20488.100_19.448_20488.100
05_BL0902-3	2963	SQDG(17:5_23:3)+HCOO	SQDG	(17:5_23:3)	M+HCOO	C50 H79 O14 S1	935.519	17.9512	812637	812637	812637	N	1	MS2	935.519	935.52	-0.00043653	-0.466618	6.68755	3.29864	33.4378	2	B	SQMG(17:5)-H2O-H(541.208947):MS2,SQMG(17:5)-H2O-H [isotope](542.210701):MS2,M-H(889.510595):MS2,M+HCOO(935.516006):MS2	17.921	5789000	0.95	0.99	1.07624e+06	BS	976000	0.042	0.051	17.921_975955.583_0.042_0.051_5789198.682_0.99_1076240.29_17.741_18.059;18.090_50353.435_0.055_0.053_348557.525_0.80_58635.06_18.059_18.220
06_BL0902-4	2523	DGDG(16:0_16:0)+HCOO	DGDG	(16:0_16:0)	M+HCOO	C48 H89 O17	937.611	17.0389	1.01303e+06	1.01303e+06	1.01303e+06	N	1	MS2	937.611	937.611	0.00083147	0.886797	40.9706	0.8203	68.2844	6	A	M-FA-FA2+H2O-GAL-H(235.081977):MS2,FA(16:0)-H(255.232777):MS2,FA(16:0)-H [isotope](256.236277):MS2,M-FA1-FA2-H(379.124239):MS2,M-FA1-FA2+H2O-H(397.134902):MS2,M-FA1-FA2+H2O-H [isotope](398.13803):MS2,M-FA1-FA2+2H2O-H(415.145524):MS2	17.038	5943000	1	0.97	1.02773e+06	SI	1028000	0	0	17.038_1027728.243_16.827_17.252_5943026.827_0.97_1027727.24_16.847_0.000_17.235_0.000
06_BL0902-4	2090	DGDG(16:0_16:1)+HCOO	DGDG	(16:0_16:1)	M+HCOO	C48 H87 O17	935.596	15.1736	1.96687e+06	1.96687e+06	1.96687e+06	N	1	MS2	935.596	935.595	0.00132247	1.41351	39.9518	0.239202	66.5863	6	A	M-FA-FA2+H2O-GAL-H(235.082002):MS2,FA(16:1)-H(253.217209):MS2,FA(16:1)-H [isotope](254.220488):MS2,FA(16:0)-H(255.232726):MS2,FA(16:0)-H [isotope](256.236228):MS2,M-FA1-FA2-H(379.124469):MS2,M-FA1-FA2+H2O-H(397.135233):MS2,M-FA1-FA2+H2O-H [isotope](398.138259):MS2,M-FA1-FA2+2H2O-H(415.145521):MS2	15.191	17570000	1	0.89	2.1893e+06	SI	2189000	0	0	15.191_2189298.442_14.979_15.450_17570990.984_0.89_2189297.44_14.979_0.000_15.413_0.000
06_BL0902-4	1769	DGDG(16:0_16:2)+HCOO	DGDG	(16:0_16:2)	M+HCOO	C48 H85 O17	933.58	13.6928	483787	483787	483787	N	1	MS2	933.58	933.579	0.00117847	1.26231	36.5764	0.0623203	60.9606	6	A	M-FA-FA2+H2O-GAL-H(235.082289):MS2,FA(16:2)-H(251.20173):MS2,FA(16:2)-H [isotope](252.204875):MS2,FA(16:0)-H(255.232843):MS2,FA(16:0)-H [isotope](256.236659):MS2,M-FA1-FA2-H(379.124848):MS2,M-FA1-FA2+H2O-H(397.135329):MS2,M-FA1-FA2+2H2O-H(415.144947):MS2	13.677	3963000	0.9	0.97	43.96	BS	441000	0.071	0.07	13.677_441028.754_0.071_0.070_3962604.125_0.97_43.96_13.511_13.831;13.349_119831.204_0.179_0.142_2453170.064_0.84_133132.72_13.092_13.511
06_BL0902-4	2350	DGDG(16:0_17:1)+HCOO	DGDG	(16:0_17:1)	M+HCOO	C49 H89 O17	949.611	16.2449	320937	320937	320937	N	1	MS2	949.61	949.611	0.00045647	0.480692	36.4058	0.205711	60.6763	6	A	M-FA-FA2+H2O-GAL-H(235.082764):MS2,FA(16:0)-H(255.233035):MS2,FA(16:0)-H [isotope](256.236029):MS2,FA(17:1)-H(267.233729):MS2,FA(17:1)-H [isotope](268.236985):MS2,M-FA1-FA2-H(379.125482):MS2,M-FA1-FA2+H2O-H(397.135382):MS2,M-FA1-FA2+2H2O-H(415.145377):MS2	16.206	2779000	1	0.99	413508	SI	413500	0	0	16.206_413508.756_16.024_16.370_2778949.672_0.99_413507.76_16.040_0.000_16.364_0.000
06_BL0902-4	1990	DGDG(16:0_17:2)+HCOO	DGDG	(16:0_17:2)	M+HCOO	C49 H87 O17	947.596	14.6982	375932	375932	375932	N	1	MS2	947.595	947.595	0.00068947	0.7276	36.1196	0.405726	60.1994	6	A	M-FA-FA2+H2O-GAL-H(235.082282):MS2,FA(16:0)-H(255.233062):MS2,FA(16:0)-H [isotope](256.236273):MS2,FA(17:2)-H(265.217432):MS2,FA(17:2)-H [isotope](266.220772):MS2,M-FA1-FA2-H(379.125379):MS2,M-FA1-FA2+H2O-H(397.135088):MS2,M-FA1-FA2+2H2O-H(415.146246):MS2	14.674	3431000	1	0.94	488972	SI	489000	0	0	14.674_488972.564_14.459_14.828_3430857.325_0.94_488971.56_14.494_0.000_14.816_0.000
06_BL0902-4	1732	DGDG(16:0_17:3)+HCOO	DGDG	(16:0_17:3)	M+HCOO	C49 H85 O17	945.58	13.5029	422097	422097	422097	N	1	MS2	945.579	945.579	0.00061047	0.645604	37.4278	0.125587	62.3797	6	A	M-FA-FA2+H2O-GAL-H(235.082676):MS2,FA(16:0)-H(255.23306):MS2,FA(16:0)-H [isotope](256.237):MS2,FA(17:3)-H(263.201877):MS2,FA(17:3)-H [isotope](264.205443):MS2,M-FA1-FA2-H(379.125902):MS2,M-FA1-FA2+H2O-H(397.135256):MS2,M-FA1-FA2+2H2O-H(415.145522):MS2	13.506	3749000	1	0.8	456569	SI	456600	0	0	13.506_456570.288_13.112_13.650_3749066.469_0.80_456569.29_13.112_0.000_13.641_0.000
06_BL0902-4	2948	DGDG(16:0_18:0)+HCOO	DGDG	(16:0_18:0)	M+HCOO	C50 H93 O17	965.643	18.9649	201482	201482	201482	N	1	MS2	965.642	965.642	0.00071647	0.741962	34.4623	1.35967	57.4372	6	A	M-FA-FA2+H2O-GAL-H(235.081968):MS2,FA(16:0)-H(255.232912):MS2,FA(16:0)-H [isotope](256.236064):MS2,FA(18:0)-H(283.264415):MS2,FA(18:0)-H [isotope](284.267418):MS2,M-FA1-FA2-H(379.125):MS2,M-FA1-FA2+H2O-H(397.134699):MS2,M-FA1-FA2+2H2O-H(415.145374):MS2	18.947	1102000	1	0.98	224631	SI	224600	0	0	18.947_224631.760_18.785_19.105_1102491.925_0.98_224630.76_18.816_0.000_19.100_0.000
06_BL0902-4	2555	DGDG(16:0_18:1)+HCOO	DGDG	(16:0_18:1)	M+HCOO	C50 H91 O17	963.627	17.1503	2439838	2439838	2439838	N	1	MS2	963.627	963.626	0.00111547	1.15757	39.1145	1.04361	65.1908	6	A	M-FA-FA2+H2O-GAL-H(235.082184):MS2,FA(16:0)-H(255.232893):MS2,FA(16:0)-H [isotope](256.236251):MS2,FA(18:1)-H(281.248523):MS2,FA(18:1)-H [isotope](282.252042):MS2,M-FA1-FA2-H(379.124607):MS2,M-FA1-FA2+H2O-H(397.134876):MS2,M-FA1-FA2+H2O-H [isotope](398.137931):MS2,M-FA1-FA2+2H2O-H(415.145693):MS2,M-FA1-FA2+2H2O-H [isotope](416.150012):MS2	17.188	24120000	1	0.98	3.47341e+06	SI	3473000	0	0	17.188_3473412.847_16.980_17.427_24116840.841_0.98_3473411.85_16.980_0.000_17.420_0.000
06_BL0902-4	2186	DGDG(16:0_18:2)+HCOO	DGDG	(16:0_18:2)	M+HCOO	C50 H89 O17	961.611	15.6142	12599209	12599209	12599209	N	1	MS2	961.611	961.611	0.00084447	0.878183	39.1997	0.283887	65.3328	6	A	M-FA-FA2+H2O-GAL-H(235.082299):MS2,FA(16:0)-H(255.232895):MS2,FA(16:0)-H [isotope](256.236444):MS2,FA(18:2)-H(279.233018):MS2,FA(18:2)-H [isotope](280.236443):MS2,M-FA1-FA2-H(379.124885):MS2,M-FA1-FA2+H2O-H(397.135132):MS2,M-FA1-FA2+H2O-H [isotope](398.138863):MS2,M-FA1-FA2+2H2O-H(415.14606):MS2	15.646	118500000	1	0.99	388.47	SI	17220000	0	0	15.646_17222962.568_15.437_15.833_118453765.620_0.99_388.47_15.474_44221.424_15.827_44221.424
06_BL0902-4	2189	DGDG(16:0_18:2)-H	DGDG	(16:0_18:2)	M-H	C49 H87 O15	915.606	15.6301	200440	200440	200440	N	1	MS2	915.606	915.605	0.00108247	1.18224	37.4226	0.268021	62.371	6	A	M-FA-FA2+H2O-GAL-H(235.081944):MS2,FA(16:0)-H(255.232761):MS2,FA(16:0)-H [isotope](256.236363):MS2,FA(18:2)-H(279.232772):MS2,FA(18:2)-H [isotope](280.236205):MS2,M-FA1-FA2-H(379.123688):MS2,M-FA1-FA2+H2O-H(397.13466):MS2,M-FA1-FA2+H2O-H [isotope](398.137068):MS2,M-FA1-FA2+2H2O-H(415.145605):MS2	15.663	1719000	0.94	0.79	253252	BS	223400	0.078	0.043	15.663_223396.730_0.078_0.043_1718838.405_0.79_253251.99_15.492_15.777;15.792_3529.606_0.015_0.014_6439.705_1.00_7594.83_15.777_15.819
06_BL0902-4	1943	DGDG(16:0_18:3)+HCOO	DGDG	(16:0_18:3)	M+HCOO	C50 H87 O17	959.596	14.5201	25504268	25504268	25504268	N	1	MS2	959.595	959.595	0.00065147	0.678901	39.7401	0.127725	66.2336	6	A	M-FA-FA2+H2O-GAL-H(235.082324):MS2,FA(16:0)-H(255.233092):MS2,FA(16:0)-H [isotope](256.236431):MS2,FA(18:3)-H(277.21752):MS2,FA(18:3)-H [isotope](278.220929):MS2,M-FA1-FA2-H(379.12575):MS2,M-FA1-FA2+H2O-H(397.135537):MS2,M-FA1-FA2+H2O-H [isotope](398.138963):MS2,M-FA1-FA2+2H2O-H(415.145919):MS2	14.505	230000000	1	0.96	267.28	SI	28790000	0	0	14.505_28794881.368_14.109_14.708_230041974.412_0.96_267.28_14.137_107332.272_14.699_107332.272
06_BL0902-4	1947	DGDG(16:0_18:3)-H	DGDG	(16:0_18:3)	M-H	C49 H85 O15	913.591	14.5325	234241	234241	234241	N	1	MS2	913.59	913.589	0.00130247	1.42566	39.1274	0.115344	65.2123	6	A	M-FA-FA2+H2O-GAL-H(235.081814):MS2,FA(16:0)-H(255.232686):MS2,FA(16:0)-H [isotope](256.236135):MS2,FA(18:3)-H(277.217114):MS2,FA(18:3)-H [isotope](278.22051):MS2,M-FA1-FA2-H(379.124292):MS2,M-FA1-FA2+H2O-H(397.135234):MS2,M-FA1-FA2+H2O-H [isotope](398.137725):MS2,M-FA1-FA2+2H2O-H(415.145744):MS2	14.509	2891000	1	0.72	418908	SI	418900	0	0	14.509_418908.791_14.252_14.665_2891400.643_0.72_418907.79_14.271_0.000_14.659_0.000
06_BL0902-4	1660	DGDG(16:0_18:4)+HCOO	DGDG	(16:0_18:4)	M+HCOO	C50 H85 O17	957.58	13.0751	508841	508841	508841	N	1	MS2	957.58	957.579	0.00113547	1.18577	35.5959	0.100166	59.3265	6	A	M-FA-FA2+H2O-GAL-H(235.082026):MS2,FA(16:0)-H(255.233121):MS2,FA(16:0)-H [isotope](256.23627):MS2,FA(18:4)-H(275.201805):MS2,FA(18:4)-H [isotope](276.205396):MS2,M-FA1-FA2-H(379.12529):MS2,M-FA1-FA2+H2O-H(397.135258):MS2,M-FA1-FA2+2H2O-H(415.145582):MS2	13.109	7663000	0.91	0.85	70.26	BS	611400	0.103	0.094	13.109_611391.403_0.103_0.094_7662964.169_0.85_70.26_12.887_13.324;12.557_3249977.475_0.098_0.069_34509934.689_0.94_301.78_12.160_12.873
06_BL0902-4	1784	DGDG(16:1_18:2)+HCOO	DGDG	(16:1_18:2)	M+HCOO	C50 H87 O17	959.596	13.7673	725783	725783	725783	N	1	MS2	959.595	959.595	0.00082947	0.864396	38.6946	0.880522	64.491	6	A	M-FA-FA2+H2O-GAL-H(235.082432):MS2,FA(16:1)-H(253.217675):MS2,FA(16:1)-H [isotope](254.221337):MS2,FA(18:2)-H(279.233448):MS2,FA(18:2)-H [isotope](280.236571):MS2,M-FA1-FA2-H(379.124603):MS2,M-FA1-FA2+H2O-H(397.13554):MS2,M-FA1-FA2+H2O-H [isotope](398.138731):MS2,M-FA1-FA2+2H2O-H(415.145964):MS2	13.773	6581000	1	0.98	61.52	SI	854500	0	0	13.773_854484.806_13.615_13.955_6581189.281_0.98_61.52_13.615_13667.024_13.950_13667.024
06_BL0902-4	1570	DGDG(16:1_18:3)+HCOO	DGDG	(16:1_18:3)	M+HCOO	C50 H85 O17	957.58	12.5797	3.35314e+06	3.35314e+06	3.35314e+06	N	1	MS2	957.579	957.579	0.00069647	0.727324	40.2506	0.395256	67.0844	6	A	M-FA-FA2+H2O-GAL-H(235.081816):MS2,FA(16:1)-H(253.217137):MS2,FA(16:1)-H [isotope](254.220429):MS2,FA(18:3)-H(277.21714):MS2,FA(18:3)-H [isotope](278.220347):MS2,M-FA1-FA2-H(379.124323):MS2,M-FA1-FA2+H2O-H(397.13472):MS2,M-FA1-FA2+H2O-H [isotope](398.138603):MS2,M-FA1-FA2+2H2O-H(415.145074):MS2	12.566	33000000	1	0.81	2952.65	SI	3502000	0	0	12.566_3502140.383_12.119_12.717_33004061.419_0.81_2952.65_12.147_1185.699_12.708_1185.699
06_BL0902-4	433	DGMG(16:0)+HCOO	DGMG	(16:0)	M+HCOO	C32 H59 O16	699.382	3.45339	717885	717885	717885	N	1	MS2	699.381	699.381	0.00081347	1.16313	13.2152	0.117928	33.0381	4	B	M-FA(16:0)-GAL-H(235.082109):MS2,FA(16:0)-H(255.232954):MS2,M-FA(16:0)-H(397.135107):MS2,M-FA(16:0)+H2O-H(415.146316):MS2	3.481	9624000	1	0.61	254734	SI	842200	0	0	3.481_842186.582_3.160_3.645_9624471.888_0.61_254734.11_3.183_3.306_3.638_3.306
06_BL0902-4	2035	MGDG(14:0_18:2)+HCOO	MGDG	(14:0_18:2)	M+HCOO	C42 H75 O12	771.527	14.9131	276810	276810	276810	N	1	MS2	771.527	771.526	0.00083847	1.08677	9.79866	0.0214528	48.9933	2	B	FA(14:0)-H(227.201258):MS2,FA(18:2)-H(279.233209):MS2	14.915	1872000	0.95	0.96	3.51	BS	223100	0.068	0.063	14.732_200290.484_0.085_0.078_2089383.183_0.93_221403.79_14.550_14.821;14.915_223072.974_0.068_0.063_1872139.302_0.96_3.51_14.821_14.998;15.127_1203420.151_0.052_0.061_8662677.462_0.99_82.49_14.998_15.286
06_BL0902-4	1759	MGDG(14:0_18:3)+HCOO	MGDG	(14:0_18:3)	M+HCOO	C42 H73 O12	769.512	13.6507	205580	205580	205580	N	1	MS2	769.511	769.511	0.00104147	1.35342	9.43097	0.435772	47.1548	2	B	FA(14:0)-H(227.201708):MS2,FA(18:3)-H(277.217224):MS2	13.669	1947000	1	0.97	238241	SI	238200	0	0	13.669_238242.316_13.468_13.828_1947062.305_0.97_238241.32_13.485_0.000_13.822_0.000
06_BL0902-4	2817	MGDG(16:0_16:0)+HCOO	MGDG	(16:0_16:0)	M+HCOO	C42 H79 O12	775.559	18.4161	2.9707e+06	2.9707e+06	2.9707e+06	N	1	MS2	775.558	775.558	0.00098447	1.26937	39.2409	2.29527	98.1023	4	A	M-FA1-FA2+H2O-H(235.081819):MS2,M-FA1-FA2+2H2O-H(253.093017):MS2,FA(16:0)-H(255.232951):MS2,FA(16:0)-H [isotope](256.236083):MS2	18.391	20330000	1	1	469.28	SI	3225000	0	0	18.391_3225132.973_18.121_18.657_20325085.606_1.00_469.28_18.146_6857.888_18.648_6857.888
06_BL0902-4	2424	MGDG(16:0_16:1)+HCOO	MGDG	(16:0_16:1)	M+HCOO	C42 H77 O12	773.543	16.5912	8.1385e+06	8.1385e+06	8.1385e+06	N	1	MS2	773.542	773.542	0.00082347	1.06454	38.4287	0.6088	96.0718	4	A	M-FA1-FA2+H2O-H(235.08197):MS2,M-FA1-FA2+2H2O-H(253.092694):MS2,FA(16:1)-H(253.217358):MS2,FA(16:1)-H [isotope](254.220518):MS2,FA(16:0)-H(255.233093):MS2,FA(16:0)-H [isotope](256.236456):MS2	16.608	67280000	1	1	1.01139e+07	SI	10110000	0	0	16.608_10113948.416_16.433_16.830_67279785.509_1.00_10113947.42_16.433_0.000_16.824_0.000
06_BL0902-4	2081	MGDG(16:0_16:2)+HCOO	MGDG	(16:0_16:2)	M+HCOO	C42 H75 O12	771.527	15.1433	1.05465e+06	1.05465e+06	1.05465e+06	N	1	MS2	771.527	771.526	0.00109447	1.41858	31.4299	0.208754	78.5747	4	A	M-FA1-FA2+H2O-H(235.082838):MS2,FA(16:2)-H(251.201604):MS2,FA(16:2)-H [isotope](252.205032):MS2,M-FA1-FA2+2H2O-H(253.093059):MS2,FA(16:0)-H(255.233017):MS2,FA(16:0)-H [isotope](256.235577):MS2	15.127	8663000	0.95	0.99	82.49	BS	1203000	0.052	0.061	14.732_200290.484_0.085_0.078_2089383.183_0.93_221403.79_14.550_14.821;14.915_223072.974_0.068_0.063_1872139.302_0.96_3.51_14.821_14.998;15.127_1203420.151_0.052_0.061_8662677.462_0.99_82.49_14.998_15.286
06_BL0902-4	2673	MGDG(16:0_17:1)+HCOO	MGDG	(16:0_17:1)	M+HCOO	C43 H79 O12	787.558	17.5996	2.27279e+06	2.27279e+06	2.27279e+06	N	1	MS2	787.558	787.558	0.00079547	1.01005	37.6271	1.47059	94.0676	4	A	M-FA1-FA2+H2O-H(235.082649):MS2,M-FA1-FA2+2H2O-H(253.092906):MS2,FA(16:0)-H(255.233192):MS2,FA(16:0)-H [isotope](256.236534):MS2,FA(17:1)-H(267.233382):MS2,FA(17:1)-H [isotope](268.236409):MS2	17.583	15150000	1	1	2.55865e+06	SI	2559000	0	0	17.583_2558651.621_17.418_17.786_15152667.849_1.00_2558650.62_17.418_0.000_17.781_0.000
06_BL0902-4	2317	MGDG(16:0_17:2)+HCOO	MGDG	(16:0_17:2)	M+HCOO	C43 H77 O12	785.543	16.116	1435306	1435306	1435306	N	1	MS2	785.543	785.542	0.00126547	1.61095	25.8093	0.273472	86.0311	3	A	M-FA1-FA2+2H2O-H(253.092751):MS2,FA(16:0)-H(255.233016):MS2,FA(16:0)-H [isotope](256.23662):MS2,FA(17:2)-H(265.217257):MS2,FA(17:2)-H [isotope](266.220073):MS2	16.11	9928000	1	0.97	1.43688e+06	SI	1437000	0	0	16.110_1436884.646_15.879_16.260_9928020.030_0.97_1436883.65_15.915_0.000_16.245_0.000
06_BL0902-4	2040	MGDG(16:0_17:3)+HCOO	MGDG	(16:0_17:3)	M+HCOO	C43 H75 O12	783.527	14.9398	923142	923142	923142	N	1	MS2	783.527	783.526	0.00090647	1.15691	21.7146	0.505589	72.382	3	A	M-FA1-FA2+2H2O-H(253.092949):MS2,FA(16:0)-H(255.233016):MS2,FA(17:3)-H(263.201767):MS2,FA(17:3)-H [isotope](264.204988):MS2	14.938	6917000	1	0.98	957427	SI	957400	0	0	14.938_957427.761_14.644_15.177_6916821.456_0.98_957426.76_14.669_0.000_15.114_0.000
06_BL0902-4	3211	MGDG(16:0_18:0)+HCOO	MGDG	(16:0_18:0)	M+HCOO	C44 H83 O12	803.59	20.1886	208139	208139	208139	N	1	MS2	803.59	803.589	0.00107247	1.3346	15.9453	1.71637	53.1512	3	A	M-FA1-FA2+2H2O-H(253.092321):MS2,FA(16:0)-H(255.232912):MS2,FA(18:0)-H(283.264151):MS2	20.229	3112000	0.93	0.93	50087.5	BS	473600	0.057	0.046	20.229_473616.724_0.057_0.046_3112140.320_0.93_50087.53_20.093_20.284;20.333_445648.979_0.032_0.057_2529605.047_0.88_470872.23_20.284_20.507
06_BL0902-4	2836	MGDG(16:0_18:1)+HCOO	MGDG	(16:0_18:1)	M+HCOO	C44 H81 O12	801.574	18.475	14176105	14176105	14176105	N	1	MS2	801.573	801.573	0.00066947	0.835195	37.9702	1.51255	94.9256	4	A	M-FA1-FA2+H2O-H(235.082728):MS2,M-FA1-FA2+2H2O-H(253.092843):MS2,FA(16:0)-H(255.232919):MS2,FA(16:0)-H [isotope](256.236297):MS2,FA(18:1)-H(281.248796):MS2,FA(18:1)-H [isotope](282.252162):MS2	18.52	159900000	1	1	3056.69	SI	25670000	0	0	18.520_25672221.019_18.330_18.747_159901077.337_1.00_3056.69_18.330_8395.950_18.740_8395.950
06_BL0902-4	2532	MGDG(16:0_18:2)+HCOO	MGDG	(16:0_18:2)	M+HCOO	C44 H79 O12	799.558	17.0756	37232036	37232036	37232036	N	1	MS2	799.558	799.558	0.00068847	0.861063	35.9757	0.890597	89.9392	4	A	M-FA1-FA2+H2O-H(235.082281):MS2,M-FA1-FA2+2H2O-H(253.092483):MS2,FA(16:0)-H(255.233131):MS2,FA(16:0)-H [isotope](256.23687):MS2,FA(18:2)-H(279.233081):MS2,FA(18:2)-H [isotope](280.236756):MS2	17.029	351400000	1	0.99	431.94	SI	57340000	0	0	17.029_57335772.338_16.748_17.236_351409371.197_0.99_431.94_16.863_132434.451_17.229_132434.451
06_BL0902-4	2255	MGDG(16:0_18:3)+HCOO	MGDG	(16:0_18:3)	M+HCOO	C44 H77 O12	797.543	15.8724	49291052	49291052	49291052	N	1	MS2	797.542	797.542	0.00086247	1.08141	37.4698	0.272521	93.6745	4	A	M-FA1-FA2+H2O-H(235.082365):MS2,M-FA1-FA2+2H2O-H(253.093029):MS2,FA(16:0)-H(255.233174):MS2,FA(16:0)-H [isotope](256.237002):MS2,FA(18:3)-H(277.217641):MS2,FA(18:3)-H [isotope](278.221099):MS2	15.886	493300000	1	0.99	228.1	SI	72600000	0	0	15.886_72598755.185_15.571_16.135_493342018.290_0.99_228.10_15.624_316891.152_16.100_316891.152
06_BL0902-4	2263	MGDG(16:0_18:3)-H	MGDG	(16:0_18:3)	M-H	C43 H75 O10	751.535	15.9029	231992	231992	231992	N	1	MS2	751.534	751.537	-0.00181453	-2.41443	28.8951	0.30306	96.3171	3	A	M-FA1-FA2+2H2O-H(253.092782):MS2,FA(16:0)-H(255.232875):MS2,FA(16:0)-H [isotope](256.236484):MS2,FA(18:3)-H(277.217188):MS2,FA(18:3)-H [isotope](278.220465):MS2	15.925	1424000	1	0.76	246802	SI	246800	0	0	15.925_246802.801_15.691_16.021_1423824.029_0.76_246801.80_15.738_0.000_16.016_0.000
06_BL0902-4	1950	MGDG(16:0_18:4)+HCOO	MGDG	(16:0_18:4)	M+HCOO	C44 H75 O12	795.527	14.5463	802353	802353	802353	N	1	MS2	795.527	795.526	0.00103747	1.30413	22.3758	0.566932	74.586	3	A	M-FA1-FA2+2H2O-H(253.093282):MS2,FA(16:0)-H(255.232898):MS2,FA(18:4)-H(275.201638):MS2,FA(18:4)-H [isotope](276.205082):MS2	14.559	6190000	1	0.8	84.2	SI	870600	0	0	14.559_870641.625_14.402_14.739_6189995.574_0.80_84.20_14.402_10218.336_14.697_10218.336
06_BL0902-4	3045	MGDG(16:0_19:1)+HCOO	MGDG	(16:0_19:1)	M+HCOO	C45 H83 O12	815.59	19.4014	217413	217413	217413	N	1	MS2	815.589	815.589	0.00093047	1.14086	11.8069	1.26591	59.0344	2	B	FA(16:0)-H(255.233073):MS2,FA(19:1)-H(295.26424):MS2	19.417	2564000	1	0.97	479455	SI	479500	0	0	19.417_479455.836_19.217_19.586_2563647.364_0.97_479454.84_19.252_0.000_19.580_0.000
06_BL0902-4	2639	MGDG(16:0_20:3)+HCOO	MGDG	(16:0_20:3)	M+HCOO	C46 H81 O12	825.574	17.4703	193965	193965	193965	N	1	MS2	825.574	825.573	0.00113947	1.38022	9.0047	1.34951	45.0235	2	B	FA(16:0)-H(255.232943):MS2,FA(20:3)-H(305.249122):MS2	17.53	2585000	1	0.93	452660	SI	452700	0	0	17.530_452660.591_17.364_17.685_2584906.043_0.93_452659.59_17.364_0.000_17.679_0.000
06_BL0902-4	2013	MGDG(16:1_16:1)+HCOO	MGDG	(16:1_16:1)	M+HCOO	C42 H75 O12	771.527	14.8044	129831	129831	129831	N	1	MS2	771.527	771.526	0.00083747	1.08547	11.3208	0.130214	56.604	2	B	FA(16:1)-H(253.217464):MS2	14.732	2089000	0.95	0.93	221404	BS	200300	0.085	0.078	14.732_200290.484_0.085_0.078_2089383.183_0.93_221403.79_14.550_14.821;14.915_223072.974_0.068_0.063_1872139.302_0.96_3.51_14.821_14.998;15.127_1203420.151_0.052_0.061_8662677.462_0.99_82.49_14.998_15.286
06_BL0902-4	2470	MGDG(16:1_18:1)+HCOO	MGDG	(16:1_18:1)	M+HCOO	C44 H79 O12	799.559	16.7995	221824	221824	221824	N	1	MS2	799.559	799.558	0.00143647	1.79658	9.25719	0.61452	46.286	2	B	FA(16:1)-H(253.21733):MS2,FA(18:1)-H(281.248705):MS2	17.029	351400000	1	0.99	431.94	SI	57340000	0	0	17.029_57335772.338_16.748_17.236_351409371.197_0.99_431.94_16.863_132434.451_17.229_132434.451
06_BL0902-4	2074	MGDG(16:1_18:2)+HCOO	MGDG	(16:1_18:2)	M+HCOO	C44 H77 O12	797.543	15.1067	266665	266665	266665	N	1	MS2	797.543	797.542	0.00109947	1.37857	11.4138	0.493164	57.069	2	B	FA(16:1)-H(253.217457):MS2,FA(18:2)-H(279.233243):MS2	15.211	8936000	1	0.42	28.43	SI	1261000	0	0	15.211_1261099.726_15.059_15.294_8935856.632_0.42_28.43_15.059_42854.535_15.290_42854.535
06_BL0902-4	1828	MGDG(16:1_18:3)+HCOO	MGDG	(16:1_18:3)	M+HCOO	C44 H75 O12	795.527	13.9951	3.56358e+06	3.56358e+06	3.56358e+06	N	1	MS2	795.527	795.526	0.00109447	1.37578	38.1679	0.0158257	95.4197	4	A	M-FA1-FA2+H2O-H(235.082023):MS2,M-FA1-FA2+2H2O-H(253.092639):MS2,FA(16:1)-H(253.21719):MS2,FA(16:1)-H [isotope](254.219949):MS2,FA(18:3)-H(277.217393):MS2,FA(18:3)-H [isotope](278.220517):MS2	13.968	33790000	1	0.95	211.54	SI	3828000	0	0	13.968_3828323.274_13.615_14.388_33794697.819_0.95_211.54_13.652_18012.008_14.138_18012.008
06_BL0902-4	2202	MGDG(18:2_18:2)+HCOO	MGDG	(18:2_18:2)	M+HCOO	C46 H79 O12	823.559	15.6746	178394	178394	178394	N	1	MS2	823.558	823.558	0.00099347	1.20631	6.7319	0.3078	33.6595	2	B	FA(18:2)-H(279.233289):MS2	15.664	1048000	1	0.98	178205	SI	178200	0	0	15.664_178206.464_15.483_15.842_1047822.907_0.98_178205.46_15.534_0.000_15.836_0.000
06_BL0902-4	1930	MGDG(18:2_18:3)+HCOO	MGDG	(18:2_18:3)	M+HCOO	C46 H77 O12	821.543	14.4631	152279	152279	152279	N	1	MS2	821.542	821.542	0.00087747	1.06808	8.13922	0.471433	40.6961	2	B	FA(18:3)-H(277.216962):MS2,FA(18:2)-H(279.232662):MS2	14.485	1380000	1	0.88	199840	SI	199800	0	0	14.485_199840.865_14.280_14.641_1380467.677_0.88_199839.87_14.280_0.000_14.635_0.000
06_BL0902-4	500	MGMG(16:0)+HCOO	MGMG	(16:0)	M+HCOO	C26 H49 O11	537.328	4.06015	2.09468e+06	2.09468e+06	2.09468e+06	N	1	MS2	537.328	537.328	7.847e-05	0.146038	25.6921	0.123072	85.6402	3	B	M-FA(16:0)-H(235.082109):MS2,M-FA(16:0)+H2O-H(253.09269):MS2,FA(16:0)-H(255.232936):MS2	4.118	33510000	1	0.58	158.23	SI	2619000	0	0	4.118_2618642.053_3.801_4.311_33506091.499_0.58_158.23_3.801_16445.443_4.303_16445.443
06_BL0902-4	2999	SQDG(17:5_23:2)+HCOO	SQDG	(17:5_23:2)	M+HCOO	C50 H81 O14 S1	937.535	19.2321	64610572	64610572	64610572	N	1	MS2	937.534	937.535	-0.00052853	-0.563745	8.1724	3.2497	40.862	2	B	SQMG(17:5)-H2O-H(541.209889):MS2,SQMG(17:5)-H2O-H [isotope](542.212297):MS2,M-H(891.527729):MS2,M-H [isotope](892.532311):MS2,M+HCOO(937.533164):MS2	19.244	510300000	1	0.95	2811.6	SI	72440000	0	0	19.244_72439176.242_19.065_19.561_510285641.340_0.95_2811.60_19.088_25755.209_19.459_25755.209
07_BL0902 (#2, 9/13/17)	1510	DGDG(14:0_18:4)+HCOO	DGDG	(14:0_18:4)	M+HCOO	C48 H81 O17	929.549	10.71	160610	160610	160610	N	1	MS2	929.549	929.548	0.00155447	1.67228	25.7019	0.110534	51.4039	5	A	FA(14:0)-H(227.201278):MS2,M-FA-FA2+H2O-GAL-H(235.081711):MS2,FA(18:4)-H(275.201644):MS2,FA(18:4)-H [isotope](276.204739):MS2,M-FA1-FA2+H2O-H(397.135086):MS2,M-FA1-FA2+2H2O-H(415.146622):MS2	10.749	2000000	1	0.54	189857	SI	189900	0	0	10.749_189858.076_10.445_10.883_1999817.157_0.54_189857.08_10.486_0.919_10.876_0.919
07_BL0902 (#2, 9/13/17)	2348	DGDG(16:0_16:0)+HCOO	DGDG	(16:0_16:0)	M+HCOO	C48 H89 O17	937.612	14.7651	4782900	4782900	4782900	N	1	MS2	937.612	937.611	0.00166047	1.77096	41.7161	1.85009	69.5268	6	A	M-FA-FA2+H2O-GAL-H(235.08215):MS2,FA(16:0)-H(255.232971):MS2,FA(16:0)-H [isotope](256.236527):MS2,M-FA1-FA2-H(379.124682):MS2,M-FA1-FA2+H2O-H(397.135138):MS2,M-FA1-FA2+H2O-H [isotope](398.137869):MS2,M-FA1-FA2+2H2O-H(415.145862):MS2	14.809	55200000	1	0.93	6.01719e+06	SI	6017000	0	0	14.809_6017193.913_14.594_15.082_55198442.629_0.93_6017192.91_14.594_0.000_15.075_0.000
07_BL0902 (#2, 9/13/17)	2448	DGDG(16:0_16:1)+HCOO	DGDG	(16:0_16:1)	M+HCOO	C48 H87 O17	935.597	15.1704	2.5776e+06	2.5776e+06	2.5776e+06	N	1	MS2	935.596	935.595	0.00184847	1.97571	39.0391	0.110383	65.0651	6	A	M-FA-FA2+H2O-GAL-H(235.08207):MS2,FA(16:1)-H(253.21728):MS2,FA(16:1)-H [isotope](254.220689):MS2,FA(16:0)-H(255.23289):MS2,FA(16:0)-H [isotope](256.236236):MS2,M-FA1-FA2-H(379.124725):MS2,M-FA1-FA2+H2O-H(397.135164):MS2,M-FA1-FA2+H2O-H [isotope](398.138938):MS2,M-FA1-FA2+2H2O-H(415.14593):MS2	15.186	22030000	1	1	2.973e+06	SI	2973000	0	0	15.186_2973003.144_14.979_15.365_22027269.037_1.00_2973002.14_14.979_0.000_15.352_0.000
07_BL0902 (#2, 9/13/17)	1807	DGDG(16:0_16:3)+HCOO	DGDG	(16:0_16:3)	M+HCOO	C48 H83 O17	931.565	12.3704	281052	281052	281052	N	1	MS2	931.565	931.564	0.00150547	1.61607	34.0027	0.129069	56.6712	6	A	M-FA-FA2+H2O-GAL-H(235.082255):MS2,FA(16:3)-H(249.186277):MS2,FA(16:3)-H [isotope](250.189778):MS2,FA(16:0)-H(255.232986):MS2,FA(16:0)-H [isotope](256.237103):MS2,M-FA1-FA2-H(379.124293):MS2,M-FA1-FA2+H2O-H(397.135426):MS2,M-FA1-FA2+2H2O-H(415.145949):MS2	12.372	3188000	1	0.68	299959	SI	300000	0	0	12.372_299960.312_12.065_12.534_3188307.395_0.68_299959.31_12.065_0.000_12.527_0.000
07_BL0902 (#2, 9/13/17)	3159	DGDG(16:0_17:0)+HCOO	DGDG	(16:0_17:0)	M+HCOO	C49 H91 O17	951.627	17.9966	166875	166875	166875	N	1	MS2	951.626	951.626	0.00081147	0.852719	39.4863	0.319701	65.8105	6	A	M-FA-FA2+H2O-GAL-H(235.081885):MS2,FA(16:0)-H(255.233086):MS2,FA(16:0)-H [isotope](256.235692):MS2,FA(17:0)-H(269.24862):MS2,FA(17:0)-H [isotope](270.252435):MS2,M-FA1-FA2-H(379.125946):MS2,M-FA1-FA2+H2O-H(397.134869):MS2,M-FA1-FA2+2H2O-H(415.144505):MS2	18.005	1297000	1	0.96	226411	SI	226400	0	0	18.005_226411.705_17.897_18.233_1297408.475_0.96_226410.71_17.897_0.000_18.196_0.000
07_BL0902 (#2, 9/13/17)	2721	DGDG(16:0_17:1)+HCOO	DGDG	(16:0_17:1)	M+HCOO	C49 H89 O17	949.611	16.2276	614310	614310	614310	N	1	MS2	949.611	949.611	0.00068647	0.722896	37.6714	0.0834456	62.7857	6	A	M-FA-FA2+H2O-GAL-H(235.08213):MS2,FA(16:0)-H(255.233093):MS2,FA(16:0)-H [isotope](256.236117):MS2,FA(17:1)-H(267.233245):MS2,FA(17:1)-H [isotope](268.236449):MS2,M-FA1-FA2-H(379.124994):MS2,M-FA1-FA2+H2O-H(397.135436):MS2,M-FA1-FA2+H2O-H [isotope](398.138742):MS2,M-FA1-FA2+2H2O-H(415.145981):MS2	16.214	4289000	1	0.94	3839.94	SI	638700	0	0	16.214_638666.314_15.997_16.369_4288577.491_0.94_3839.94_16.032_166.279_16.363_166.279
07_BL0902 (#2, 9/13/17)	2406	DGDG(16:0_17:2)+HCOO	DGDG	(16:0_17:2)	M+HCOO	C49 H87 O17	947.596	14.9952	244165	244165	244165	N	1	MS2	947.595	947.595	0.00105047	1.10856	29.7882	0.00265285	59.5763	5	A	M-FA-FA2+H2O-GAL-H(235.082305):MS2,FA(16:0)-H(255.233122):MS2,FA(16:0)-H [isotope](256.236578):MS2,FA(17:2)-H(265.217653):MS2,FA(17:2)-H [isotope](266.221744):MS2,M-FA1-FA2+H2O-H(397.135154):MS2,M-FA1-FA2+2H2O-H(415.14625):MS2	14.988	1876000	1	0.96	254604	SI	254600	0	0	14.988_254605.231_14.785_15.188_1875541.582_0.96_254604.23_14.804_0.000_15.182_0.000
07_BL0902 (#2, 9/13/17)	2010	DGDG(16:0_17:3)+HCOO	DGDG	(16:0_17:3)	M+HCOO	C49 H85 O17	945.58	13.2951	349596	349596	349596	N	1	MS2	945.579	945.579	0.00072047	0.761935	38.2769	0.154829	63.7949	6	A	M-FA-FA2+H2O-GAL-H(235.081897):MS2,FA(16:0)-H(255.233195):MS2,FA(16:0)-H [isotope](256.235635):MS2,FA(17:3)-H(263.201877):MS2,FA(17:3)-H [isotope](264.205138):MS2,M-FA1-FA2-H(379.124863):MS2,M-FA1-FA2+H2O-H(397.135045):MS2,M-FA1-FA2+H2O-H [isotope](398.138687):MS2,M-FA1-FA2+2H2O-H(415.146418):MS2	13.271	3852000	0.8	0.51	425167	BS	399500	0.111	0.04	13.271_399496.980_0.111_0.040_3851739.369_0.51_425166.69_13.058_13.350;13.025_3615.355_0.015_0.014_6689.006_0.96_11159.28_12.979_13.058
07_BL0902 (#2, 9/13/17)	1744	DGDG(16:0_17:4)+HCOO	DGDG	(16:0_17:4)	M+HCOO	C49 H83 O17	943.565	11.9969	198359	198359	198359	N	1	MS2	943.564	943.564	0.00094347	0.9999	36.4659	0.186612	60.7765	6	A	M-FA-FA2+H2O-GAL-H(235.081338):MS2,FA(16:0)-H(255.233024):MS2,FA(16:0)-H [isotope](256.235438):MS2,FA(17:4)-H(261.185674):MS2,FA(17:4)-H [isotope](262.189415):MS2,M-FA1-FA2-H(379.124304):MS2,M-FA1-FA2+H2O-H(397.135384):MS2,M-FA1-FA2+2H2O-H(415.145838):MS2	12.091	3769000	1	0.79	423665	SI	423700	0	0	12.091_423665.732_11.726_12.246_3768917.981_0.79_423664.73_11.726_0.000_12.238_0.000
07_BL0902 (#2, 9/13/17)	3409	DGDG(16:0_18:0)+HCOO	DGDG	(16:0_18:0)	M+HCOO	C50 H93 O17	965.643	18.9779	1.4421e+06	1.4421e+06	1.4421e+06	N	1	MS2	965.642	965.642	0.00120347	1.24629	38.9748	0.325106	64.9581	6	A	M-FA-FA2+H2O-GAL-H(235.082204):MS2,FA(16:0)-H(255.233104):MS2,FA(16:0)-H [isotope](256.236175):MS2,FA(18:0)-H(283.264619):MS2,FA(18:0)-H [isotope](284.268005):MS2,M-FA1-FA2-H(379.124813):MS2,M-FA1-FA2+H2O-H(397.135575):MS2,M-FA1-FA2+H2O-H [isotope](398.138624):MS2,M-FA1-FA2+2H2O-H(415.146005):MS2	18.95	9073000	1	0.99	243083	SI	1560000	0	0	18.950_1559513.471_18.761_19.222_9073321.158_0.99_243083.03_18.783_6.416_19.139_6.416
07_BL0902 (#2, 9/13/17)	2980	DGDG(16:0_18:1)+HCOO	DGDG	(16:0_18:1)	M+HCOO	C50 H91 O17	963.627	17.2381	3.75852e+06	3.75852e+06	3.75852e+06	N	1	MS2	963.627	963.626	0.00123647	1.28314	39.2936	0.191415	65.4894	6	A	M-FA-FA2+H2O-GAL-H(235.082244):MS2,FA(16:0)-H(255.23295):MS2,FA(16:0)-H [isotope](256.236324):MS2,FA(18:1)-H(281.248637):MS2,FA(18:1)-H [isotope](282.25206):MS2,M-FA1-FA2-H(379.124217):MS2,M-FA1-FA2+H2O-H(397.135176):MS2,M-FA1-FA2+H2O-H [isotope](398.138852):MS2,M-FA1-FA2+2H2O-H(415.145749):MS2	17.176	46620000	1	1	678.4	SI	6774000	0	0	17.176_6774160.170_16.947_17.423_46624163.711_1.00_678.40_16.970_9970.761_17.370_9970.761
07_BL0902 (#2, 9/13/17)	2663	DGDG(16:0_18:2)+HCOO	DGDG	(16:0_18:2)	M+HCOO	C50 H89 O17	961.612	16.0109	3979134	3979134	3979134	N	1	MS2	961.611	961.611	0.00109747	1.14128	40.6096	0.0806413	67.6826	6	A	M-FA-FA2+H2O-GAL-H(235.082294):MS2,FA(16:0)-H(255.233091):MS2,FA(16:0)-H [isotope](256.236411):MS2,FA(18:2)-H(279.233215):MS2,FA(18:2)-H [isotope](280.236514):MS2,M-FA1-FA2-H(379.124764):MS2,M-FA1-FA2+H2O-H(397.135426):MS2,M-FA1-FA2+H2O-H [isotope](398.13878):MS2,M-FA1-FA2+2H2O-H(415.146195):MS2	16.031	27780000	1	0.98	184.07	SI	4262000	0	0	16.031_4261875.237_15.828_16.208_27777448.286_0.98_184.07_15.828_23027.965_16.202_23027.965
07_BL0902 (#2, 9/13/17)	2222	DGDG(16:0_18:3)+HCOO	DGDG	(16:0_18:3)	M+HCOO	C50 H87 O17	959.595	14.2686	13713522	13713522	13713522	N	1	MS2	959.595	959.595	0.00055947	0.583027	37.6832	0.349472	62.8053	6	A	M-FA-FA2+H2O-GAL-H(235.082255):MS2,FA(16:0)-H(255.232932):MS2,FA(16:0)-H [isotope](256.236382):MS2,FA(18:3)-H(277.217332):MS2,FA(18:3)-H [isotope](278.221014):MS2,M-FA1-FA2-H(379.124809):MS2,M-FA1-FA2+H2O-H(397.135196):MS2,M-FA1-FA2+H2O-H [isotope](398.138772):MS2,M-FA1-FA2+2H2O-H(415.146129):MS2	14.248	136100000	0.95	0.96	564.82	BS	13610000	0.087	0.069	14.248_13608028.979_0.087_0.069_136083204.150_0.96_564.82_14.025_14.365;14.504_10526810.887_0.076_0.071_98454418.853_0.92_113.02_14.365_14.722
07_BL0902 (#2, 9/13/17)	2279	DGDG(16:0_18:3)-H	DGDG	(16:0_18:3)	M-H	C49 H85 O15	913.591	14.4969	195051	195051	195051	N	1	MS2	913.591	913.589	0.00188747	2.06599	37.9729	0.12124	63.2882	6	A	M-FA-FA2+H2O-GAL-H(235.082053):MS2,FA(16:0)-H(255.232809):MS2,FA(16:0)-H [isotope](256.23605):MS2,FA(18:3)-H(277.217259):MS2,FA(18:3)-H [isotope](278.22067):MS2,M-FA1-FA2-H(379.124983):MS2,M-FA1-FA2+H2O-H(397.134957):MS2,M-FA1-FA2+H2O-H [isotope](398.14094):MS2,M-FA1-FA2+2H2O-H(415.145729):MS2	14.496	1197000	0.95	0.9	212903	BS	157300	0.061	0.058	14.256_168683.060_0.102_0.066_1810526.635_0.83_200237.89_14.028_14.368;14.496_157313.391_0.061_0.058_1196584.195_0.90_212902.88_14.368_14.660
07_BL0902 (#2, 9/13/17)	1958	DGDG(16:0_18:4)+HCOO	DGDG	(16:0_18:4)	M+HCOO	C50 H85 O17	957.58	13.0817	31460276	31460276	31460276	N	1	MS2	957.579	957.579	0.00040447	0.422388	37.7183	0.0335098	62.8638	6	A	M-FA-FA2+H2O-GAL-H(235.082288):MS2,FA(16:0)-H(255.233117):MS2,FA(16:0)-H [isotope](256.236385):MS2,FA(18:4)-H(275.201781):MS2,FA(18:4)-H [isotope](276.205443):MS2,M-FA1-FA2-H(379.124886):MS2,M-FA1-FA2+H2O-H(397.135392):MS2,M-FA1-FA2+H2O-H [isotope](398.138385):MS2,M-FA1-FA2+2H2O-H(415.146023):MS2,M-FA1-FA2+2H2O-H [isotope](416.149245):MS2	13.112	407900000	0.91	0.89	292.67	BS	36580000	0.113	0.061	12.309_445057.491_0.111_0.104_6092330.236_0.79_3.94_12.165_12.415;12.566_448376.283_0.138_0.174_8927401.426_0.84_1.19_12.437_12.612;13.112_36580406.365_0.113_0.061_407903944.958_0.89_292.67_12.846_13.430
07_BL0902 (#2, 9/13/17)	1959	DGDG(16:0_18:4)-H	DGDG	(16:0_18:4)	M-H	C49 H83 O15	911.575	13.084	504338	504338	504338	N	1	MS2	911.574	911.574	0.00120447	1.32131	35.4403	0.0358098	59.0672	6	A	M-FA-FA2+H2O-GAL-H(235.082131):MS2,FA(16:0)-H(255.233095):MS2,FA(16:0)-H [isotope](256.236361):MS2,FA(18:4)-H(275.20176):MS2,FA(18:4)-H [isotope](276.204977):MS2,M-FA1-FA2-H(379.124825):MS2,M-FA1-FA2+H2O-H(397.135231):MS2,M-FA1-FA2+H2O-H [isotope](398.137816):MS2,M-FA1-FA2+2H2O-H(415.145629):MS2	13.132	5523000	1	0.77	639002	SI	639000	0	0	13.132_639003.033_12.872_13.275_5523464.509_0.77_639002.03_12.872_0.000_13.269_0.000
07_BL0902 (#2, 9/13/17)	2692	DGDG(16:0_20:3)+HCOO	DGDG	(16:0_20:3)	M+HCOO	C52 H91 O17	987.627	16.1269	225496	225496	225496	N	1	MS2	987.626	987.626	0.00073647	0.745697	36.1161	0.488283	60.1935	6	A	M-FA-FA2+H2O-GAL-H(235.082415):MS2,FA(16:0)-H(255.233029):MS2,FA(20:3)-H(305.24885):MS2,FA(20:3)-H [isotope](306.269956):MS2,M-FA1-FA2-H(379.123855):MS2,M-FA1-FA2+H2O-H(397.135487):MS2,M-FA1-FA2+2H2O-H(415.146123):MS2	16.148	1801000	1	0.99	321480	SI	321500	0	0	16.148_321480.803_15.975_16.292_1800829.905_0.99_321479.80_15.990_0.000_16.287_0.000
07_BL0902 (#2, 9/13/17)	2366	DGDG(16:0_20:4)+HCOO	DGDG	(16:0_20:4)	M+HCOO	C52 H89 O17	985.612	14.8223	1.01e+06	1.01e+06	1.01e+06	N	1	MS2	985.611	985.611	0.00103747	1.05262	39.6837	0.458485	66.1395	6	A	M-FA-FA2+H2O-GAL-H(235.082252):MS2,FA(16:0)-H(255.232952):MS2,FA(16:0)-H [isotope](256.236302):MS2,FA(20:4)-H(303.233011):MS2,FA(20:4)-H [isotope](304.236519):MS2,M-FA1-FA2-H(379.124676):MS2,M-FA1-FA2+H2O-H(397.135442):MS2,M-FA1-FA2+H2O-H [isotope](398.139685):MS2,M-FA1-FA2+2H2O-H(415.146216):MS2	14.846	8863000	1	0.93	1.19913e+06	SI	1199000	0	0	14.846_1199134.240_14.603_15.037_8862950.956_0.93_1199133.24_14.623_0.000_15.024_0.000
07_BL0902 (#2, 9/13/17)	2517	DGDG(16:1_18:1)+HCOO	DGDG	(16:1_18:1)	M+HCOO	C50 H89 O17	961.611	15.4622	184155	184155	184155	N	1	MS2	961.611	961.611	0.00065647	0.682678	26.9138	0.468099	44.8564	6	A	M-FA-FA2+H2O-GAL-H(235.082193):MS2,FA(16:1)-H(253.217427):MS2,FA(18:1)-H(281.248561):MS2,M-FA1-FA2-H(379.124488):MS2,M-FA1-FA2+H2O-H(397.135032):MS2,M-FA1-FA2+H2O-H [isotope](398.138036):MS2,M-FA1-FA2+2H2O-H(415.145903):MS2	15.598	7808000	1	0.99	40910.2	SI	777000	0	0	15.598_776952.728_15.272_15.817_7807748.581_0.99_40910.23_15.302_18.991_15.809_18.991
07_BL0902 (#2, 9/13/17)	1855	DGDG(16:1_18:3)+HCOO	DGDG	(16:1_18:3)	M+HCOO	C50 H85 O17	957.58	12.5717	491272	491272	491272	N	1	MS2	957.579	957.579	0.00046047	0.480869	38.669	0.476562	64.4483	6	A	M-FA-FA2+H2O-GAL-H(235.082353):MS2,FA(16:1)-H(253.217486):MS2,FA(16:1)-H [isotope](254.220866):MS2,FA(18:3)-H(277.217471):MS2,FA(18:3)-H [isotope](278.221382):MS2,M-FA1-FA2-H(379.123984):MS2,M-FA1-FA2+H2O-H(397.135171):MS2,M-FA1-FA2+H2O-H [isotope](398.138189):MS2,M-FA1-FA2+2H2O-H(415.145641):MS2	12.566	8927000	0.91	0.84	1.19	BS	448400	0.138	0.174	12.309_445057.491_0.111_0.104_6092330.236_0.79_3.94_12.165_12.415;12.566_448376.283_0.138_0.174_8927401.426_0.84_1.19_12.437_12.612;13.112_36580406.365_0.113_0.061_407903944.958_0.89_292.67_12.846_13.430
07_BL0902 (#2, 9/13/17)	1580	DGDG(16:1_18:4)+HCOO	DGDG	(16:1_18:4)	M+HCOO	C50 H83 O17	955.564	11.0962	2859255	2859255	2859255	N	1	MS2	955.564	955.564	0.00075447	0.789555	38.0289	0.297054	63.3815	6	A	M-FA-FA2+H2O-GAL-H(235.082545):MS2,FA(16:1)-H(253.217362):MS2,FA(16:1)-H [isotope](254.220719):MS2,FA(18:4)-H(275.201588):MS2,FA(18:4)-H [isotope](276.205042):MS2,M-FA1-FA2-H(379.124666):MS2,M-FA1-FA2+H2O-H(397.135174):MS2,M-FA1-FA2+H2O-H [isotope](398.138702):MS2,M-FA1-FA2+2H2O-H(415.145978):MS2,M-FA1-FA2+2H2O-H [isotope](416.149873):MS2	11.119	31960000	1	0.5	433	SI	3239000	0	0	11.119_3238914.351_10.809_11.247_31962698.993_0.50_433.00_10.830_7462.949_11.240_7462.949
07_BL0902 (#2, 9/13/17)	419	DGMG(16:0)+HCOO	DGMG	(16:0)	M+HCOO	C32 H59 O16	699.382	3.335	7.54096e+06	7.54096e+06	7.54096e+06	N	1	MS2	699.381	699.381	0.00072547	1.0373	13.2502	0.168743	33.1254	4	B	M-FA(16:0)-GAL-H(235.081953):MS2,FA(16:0)-H(255.232945):MS2,FA(16:0)-H [isotope](256.236678):MS2,M-FA(16:0)-H(397.134513):MS2,M-FA(16:0)+H2O-H(415.145921):MS2	3.485	151300000	1	0.75	852.83	SI	12990000	0	0	3.485_12992325.325_3.198_3.637_151273226.636_0.75_852.83_3.198_15216.585_3.637_15216.585;3.722_2642704.567_3.637_3.913_17642736.165_0.73_35.14_3.637_73124.523_3.902_73124.523
07_BL0902 (#2, 9/13/17)	446	DGMG(16:0)-H	DGMG	(16:0)	M-H	C31 H57 O14	653.376	3.501	328217	328217	328217	N	1	MS2	653.376	653.375	0.00068347	1.04606	11.7292	0.00273792	29.3229	4	B	M-FA(16:0)-GAL-H(235.082037):MS2,FA(16:0)-H(255.233088):MS2,FA(16:0)-H [isotope](256.23643):MS2,M-FA(16:0)-H(397.134977):MS2,M-FA(16:0)+H2O-H(415.14646):MS2	3.489	3608000	1	0.71	418753	SI	418800	0	0	3.489_418753.610_3.176_3.650_3607638.082_0.71_418752.61_3.198_0.000_3.635_0.000
07_BL0902 (#2, 9/13/17)	350	DGMG(16:1)+HCOO	DGMG	(16:1)	M+HCOO	C32 H57 O16	697.366	2.81628	512485	512485	512485	N	1	MS2	697.365	697.365	0.00061347	0.879697	13.5705	0.168959	33.9262	4	B	M-FA(16:1)-GAL-H(235.082785):MS2,FA(16:1)-H(253.217396):MS2,M-FA(16:1)-H(397.1343):MS2,M-FA(16:1)+H2O-H(415.145496):MS2	2.793	6222000	1	0.92	573039	SI	573000	0	0	2.793_573039.809_2.546_3.117_6222133.015_0.92_573038.81_2.546_0.000_3.108_0.000
07_BL0902 (#2, 9/13/17)	1769	MGDG(14:0_18:4)+HCOO	MGDG	(14:0_18:4)	M+HCOO	C42 H71 O12	767.496	12.149	209474	209474	209474	N	1	MS2	767.496	767.495	0.00120047	1.56414	11.7157	0.507194	39.0523	3	A	FA(14:0)-H(227.201435):MS2,M-FA1-FA2+2H2O-H(253.093177):MS2,FA(18:4)-H(275.201236):MS2	12.227	2848000	1	0.9	319841	SI	319800	0	0	12.227_319842.033_11.968_12.431_2848415.738_0.90_319841.03_11.990_0.000_12.423_0.000
07_BL0902 (#2, 9/13/17)	3244	MGDG(16:0_16:0)+HCOO	MGDG	(16:0_16:0)	M+HCOO	C42 H79 O12	775.559	18.3992	3591642	3591642	3591642	N	1	MS2	775.558	775.558	0.00123647	1.5943	38.4244	1.05723	96.0611	4	A	M-FA1-FA2+H2O-H(235.082168):MS2,M-FA1-FA2+2H2O-H(253.093021):MS2,FA(16:0)-H(255.232794):MS2,FA(16:0)-H [isotope](256.236088):MS2	18.414	29370000	1	0.95	416.14	SI	3774000	0	0	18.414_3773871.852_18.205_18.717_29370192.751_0.95_416.14_18.229_9046.989_18.709_9046.989
07_BL0902 (#2, 9/13/17)	2811	MGDG(16:0_16:1)+HCOO	MGDG	(16:0_16:1)	M+HCOO	C42 H77 O12	773.543	16.5913	7539552	7539552	7539552	N	1	MS2	773.542	773.542	0.00093047	1.20287	37.5217	0.433609	93.8043	4	A	M-FA1-FA2+H2O-H(235.082342):MS2,M-FA1-FA2+2H2O-H(253.092958):MS2,FA(16:1)-H(253.217333):MS2,FA(16:1)-H [isotope](254.220774):MS2,FA(16:0)-H(255.233138):MS2,FA(16:0)-H [isotope](256.236557):MS2	16.613	66630000	1	0.99	4161.13	SI	8831000	0	0	16.613_8831497.351_16.406_16.837_66625254.984_0.99_4161.13_16.426_2121.870_16.830_2121.870
07_BL0902 (#2, 9/13/17)	2445	MGDG(16:0_16:2)+HCOO	MGDG	(16:0_16:2)	M+HCOO	C42 H75 O12	771.528	15.1603	276100	276100	276100	N	1	MS2	771.527	771.526	0.00143447	1.85926	10.782	0.311193	53.9098	2	B	FA(16:2)-H(251.201931):MS2,FA(16:0)-H(255.233052):MS2	15.113	3059000	0.96	0.99	19.06	BS	342600	0.066	0.074	15.113_342618.966_0.066_0.074_3058724.156_0.99_19.06_14.878_15.271;15.388_106631.513_0.075_0.065_956486.214_0.91_8.33_15.271_15.611
07_BL0902 (#2, 9/13/17)	2136	MGDG(16:0_16:3)+HCOO	MGDG	(16:0_16:3)	M+HCOO	C42 H73 O12	769.512	13.8631	583404	583404	583404	N	1	MS2	769.511	769.511	0.00104347	1.35602	18.3614	0.576464	61.2046	3	A	FA(16:3)-H(249.185967):MS2,M-FA1-FA2+2H2O-H(253.09342):MS2,FA(16:0)-H(255.233004):MS2,FA(16:0)-H [isotope](256.23554):MS2	13.883	6920000	1	0.93	715627	SI	715600	0	0	13.883_715628.378_13.519_14.170_6920241.305_0.93_715627.38_13.519_0.000_14.159_0.000
07_BL0902 (#2, 9/13/17)	1880	MGDG(16:0_16:4)+HCOO	MGDG	(16:0_16:4)	M+HCOO	C42 H71 O12	767.496	12.6855	171277	171277	171277	N	1	MS2	767.495	767.495	0.00093947	1.22407	7.34644	1.04369	36.7322	2	B	FA(16:4)-H(247.169935):MS2,FA(16:0)-H(255.233325):MS2	12.682	1469000	0.94	0.89	188050	BS	177700	0.075	0.055	12.682_177711.828_0.075_0.055_1469054.989_0.89_188049.94_12.509_12.824;12.852_1277.545_0.013_0.014_2247.342_0.82_3788.43_12.824_12.877
07_BL0902 (#2, 9/13/17)	3524	MGDG(16:0_17:0)+HCOO	MGDG	(16:0_17:0)	M+HCOO	C43 H81 O12	789.575	19.4305	257839	257839	257839	N	1	MS2	789.574	789.573	0.00127747	1.61792	13.2928	0.0378464	66.4638	2	B	FA(16:0)-H(255.233162):MS2,FA(17:0)-H(269.248871):MS2,FA(17:0)-H [isotope](270.253263):MS2	19.46	2346000	0.96	0.96	171.41	BS	517400	0.035	0.036	19.460_517351.390_0.035_0.036_2345806.119_0.96_171.41_19.380_19.560;19.340_148243.519_0.046_0.051_915188.704_0.83_169313.34_19.238_19.380
07_BL0902 (#2, 9/13/17)	3087	MGDG(16:0_17:1)+HCOO	MGDG	(16:0_17:1)	M+HCOO	C43 H79 O12	787.559	17.615	1.70058e+06	1.70058e+06	1.70058e+06	N	1	MS2	787.558	787.558	0.00120247	1.52683	23.9535	0.655425	79.845	3	A	M-FA1-FA2+2H2O-H(253.092593):MS2,FA(16:0)-H(255.232831):MS2,FA(16:0)-H [isotope](256.235984):MS2,FA(17:1)-H(267.233052):MS2,FA(17:1)-H [isotope](268.236846):MS2	17.601	14350000	1	0.93	1.80901e+06	SI	1809000	0	0	17.601_1809013.900_17.398_17.800_14349582.035_0.93_1809012.90_17.417_0.000_17.794_0.000
07_BL0902 (#2, 9/13/17)	2755	MGDG(16:0_17:2)+HCOO	MGDG	(16:0_17:2)	M+HCOO	C43 H77 O12	785.543	16.3588	259956	259956	259956	N	1	MS2	785.543	785.542	0.00119047	1.51547	11.9562	0.578454	59.7809	2	B	FA(16:0)-H(255.233366):MS2,FA(17:2)-H(265.217473):MS2	16.415	3596000	1	0.99	566167	SI	566200	0	0	16.415_566167.998_16.253_16.614_3596046.897_0.99_566167.00_16.253_0.341_16.609_0.341
07_BL0902 (#2, 9/13/17)	2353	MGDG(16:0_17:3)+HCOO	MGDG	(16:0_17:3)	M+HCOO	C43 H75 O12	783.527	14.7798	559270	559270	559270	N	1	MS2	783.527	783.526	0.00097347	1.24242	12.6529	0.328541	63.2646	2	B	FA(16:0)-H(255.23293):MS2,FA(17:3)-H(263.20163):MS2	14.726	6214000	0.94	0.99	777321	BS	737200	0.069	0.063	14.726_737197.616_0.069_0.063_6213752.418_0.99_777321.17_14.545_14.842;14.935_238413.829_0.071_0.096_2546818.174_0.77_39.57_14.842_15.126
07_BL0902 (#2, 9/13/17)	2073	MGDG(16:0_17:4)+HCOO	MGDG	(16:0_17:4)	M+HCOO	C43 H73 O12	781.512	13.5665	813072	813072	813072	N	1	MS2	781.511	781.511	0.00103947	1.33008	13.9083	0.674789	69.5413	2	B	FA(16:0)-H(255.233072):MS2,FA(17:4)-H(261.18623):MS2,FA(17:4)-H [isotope](262.189877):MS2	13.558	6874000	1	0.96	26297.2	SI	818800	0	0	13.558_818806.428_13.278_13.825_6873854.306_0.96_26297.25_13.304_31.135_13.816_31.135
07_BL0902 (#2, 9/13/17)	3716	MGDG(16:0_18:0)+HCOO	MGDG	(16:0_18:0)	M+HCOO	C44 H83 O12	803.591	20.1951	249014	249014	249014	N	1	MS2	803.59	803.589	0.00158547	1.97298	36.9878	1.46718	92.4695	4	A	M-FA1-FA2+H2O-H(235.081618):MS2,M-FA1-FA2+2H2O-H(253.093392):MS2,FA(16:0)-H(255.23318):MS2,FA(16:0)-H [isotope](256.236602):MS2,FA(18:0)-H(283.264786):MS2,FA(18:0)-H [isotope](284.268652):MS2	20.334	12770000	1	0.96	55138.4	SI	2082000	0	0	20.334_2082397.335_20.068_20.565_12771200.275_0.96_55138.37_20.091_37.766_20.526_37.766
07_BL0902 (#2, 9/13/17)	3291	MGDG(16:0_18:1)+HCOO	MGDG	(16:0_18:1)	M+HCOO	C44 H81 O12	801.574	18.5587	13439601	13439601	13439601	N	1	MS2	801.574	801.573	0.00109847	1.37039	37.7426	0.507083	94.3566	4	A	M-FA1-FA2+H2O-H(235.082763):MS2,M-FA1-FA2+2H2O-H(253.092733):MS2,FA(16:0)-H(255.233009):MS2,FA(16:0)-H [isotope](256.236971):MS2,FA(18:1)-H(281.248657):MS2,FA(18:1)-H [isotope](282.252307):MS2	18.527	144800000	0.88	0.92	897.68	BS	17950000	0.068	0.058	18.527_17947484.643_0.068_0.058_144781622.108_0.92_897.68_18.308_18.588;18.645_12111962.926_0.034_0.101_104359349.427_0.56_29.39_18.588_18.756
07_BL0902 (#2, 9/13/17)	3009	MGDG(16:0_18:2)+HCOO	MGDG	(16:0_18:2)	M+HCOO	C44 H79 O12	799.559	17.3382	5.02146e+06	5.02146e+06	5.02146e+06	N	1	MS2	799.558	799.558	0.00101047	1.26379	37.5287	0.594587	93.8217	4	A	M-FA1-FA2+H2O-H(235.082069):MS2,M-FA1-FA2+2H2O-H(253.092671):MS2,FA(16:0)-H(255.233021):MS2,FA(16:0)-H [isotope](256.236297):MS2,FA(18:2)-H(279.233089):MS2,FA(18:2)-H [isotope](280.236491):MS2	17.385	73640000	0.88	0.99	136.17	BS	9854000	0.059	0.058	17.024_2839615.316_0.229_0.127_64557021.741_0.73_727.37_16.655_17.248;17.385_9854350.463_0.059_0.058_73639543.494_0.99_136.17_17.248_17.677
07_BL0902 (#2, 9/13/17)	2643	MGDG(16:0_18:3)+HCOO	MGDG	(16:0_18:3)	M+HCOO	C44 H77 O12	797.543	15.9416	18403826	18403826	18403826	N	1	MS2	797.543	797.542	0.00114447	1.435	38.3036	0.48793	95.7591	4	A	M-FA1-FA2+H2O-H(235.082871):MS2,M-FA1-FA2+2H2O-H(253.09296):MS2,FA(16:0)-H(255.233248):MS2,FA(16:0)-H [isotope](256.236553):MS2,FA(18:3)-H(277.217721):MS2,FA(18:3)-H [isotope](278.220831):MS2	15.902	200600000	0.95	0.94	194.03	BS	21520000	0.078	0.068	15.688_12726079.391_0.085_0.069_125336234.694_0.98_1072.30_15.449_15.776;15.902_21515273.496_0.078_0.068_200614333.066_0.94_194.03_15.776_16.234
07_BL0902 (#2, 9/13/17)	2277	MGDG(16:0_18:4)+HCOO	MGDG	(16:0_18:4)	M+HCOO	C44 H75 O12	795.527	14.4924	57085296	57085296	57085296	N	1	MS2	795.527	795.526	0.00105847	1.33053	27.3862	0.456823	91.2874	3	A	M-FA1-FA2+2H2O-H(253.093107):MS2,FA(16:0)-H(255.232975):MS2,FA(16:0)-H [isotope](256.236462):MS2,FA(18:4)-H(275.201466):MS2,FA(18:4)-H [isotope](276.204825):MS2	14.548	689200000	0.96	0.98	1288.75	BS	76110000	0.078	0.063	13.975_869825.576_0.077_0.077_8534343.186_0.98_10.71_13.859_14.141;14.548_76106235.027_0.078_0.063_689243808.556_0.98_1288.75_14.307_14.897
07_BL0902 (#2, 9/13/17)	2301	MGDG(16:0_18:4)-H	MGDG	(16:0_18:4)	M-H	C43 H73 O10	749.522	14.5929	126553	126553	126553	N	1	MS2	749.521	749.521	0.00074947	0.999932	28.1737	0.557333	93.9122	3	A	M-FA1-FA2+2H2O-H(253.092931):MS2,FA(16:0)-H(255.232916):MS2,FA(16:0)-H [isotope](256.236695):MS2,FA(18:4)-H(275.201442):MS2,FA(18:4)-H [isotope](276.205227):MS2	14.535	1824000	0.95	0.93	306932	BS	237500	0.057	0.063	14.535_237465.614_0.057_0.063_1824333.755_0.93_306932.10_14.371_14.674;14.702_8118.994_0.023_0.020_22356.755_0.92_966.98_14.674_14.784
07_BL0902 (#2, 9/13/17)	3512	MGDG(16:0_19:1)+HCOO	MGDG	(16:0_19:1)	M+HCOO	C45 H83 O12	815.59	19.3937	232949	232949	232949	N	1	MS2	815.59	815.589	0.00133747	1.63988	9.22098	0.446148	46.1049	2	B	FA(16:0)-H(255.233259):MS2,FA(19:1)-H(295.264256):MS2	19.449	3233000	0.87	0.97	662646	BS	575000	0.049	0.039	19.449_575012.673_0.049_0.039_3233328.666_0.97_662645.77_19.251_19.629;19.702_15497.386_0.144_0.156_297295.119_0.26_22341.02_19.629_19.762
07_BL0902 (#2, 9/13/17)	3063	MGDG(16:0_20:3)+HCOO	MGDG	(16:0_20:3)	M+HCOO	C46 H81 O12	825.575	17.5289	748490	748490	748490	N	1	MS2	825.574	825.573	0.00138547	1.67819	16.1011	0.186928	80.5055	2	B	FA(16:0)-H(255.233173):MS2,FA(16:0)-H [isotope](256.236678):MS2,FA(20:3)-H(305.248862):MS2,FA(20:3)-H [isotope](306.252063):MS2	17.504	6780000	1	0.94	951240	SI	951200	0	0	17.504_951241.452_17.313_17.710_6780370.383_0.94_951240.45_17.351_0.000_17.704_0.000
07_BL0902 (#2, 9/13/17)	2717	MGDG(16:0_20:4)+HCOO	MGDG	(16:0_20:4)	M+HCOO	C46 H79 O12	823.559	16.2151	3.53803e+06	3.53803e+06	3.53803e+06	N	1	MS2	823.559	823.558	0.00156447	1.89965	37.6765	0.0573895	94.1913	4	A	M-FA1-FA2+H2O-H(235.081898):MS2,M-FA1-FA2+2H2O-H(253.093208):MS2,FA(16:0)-H(255.233035):MS2,FA(16:0)-H [isotope](256.236361):MS2,FA(20:4)-H(303.233172):MS2,FA(20:4)-H [isotope](304.236201):MS2	16.211	27190000	1	0.98	258.34	SI	3547000	0	0	16.211_3547335.592_16.021_16.558_27194996.155_0.98_258.34_16.021_13678.456_16.516_13678.456
07_BL0902 (#2, 9/13/17)	2858	MGDG(16:1_18:1)+HCOO	MGDG	(16:1_18:1)	M+HCOO	C44 H79 O12	799.559	16.7864	221259	221259	221259	N	1	MS2	799.559	799.558	0.00136447	1.70653	8.3346	0.0428029	41.673	2	B	FA(16:1)-H(253.217636):MS2,FA(18:1)-H(281.248733):MS2	17.024	64560000	0.88	0.73	727.37	BS	2840000	0.229	0.127	17.024_2839615.316_0.229_0.127_64557021.741_0.73_727.37_16.655_17.248;17.385_9854350.463_0.059_0.058_73639543.494_0.99_136.17_17.248_17.677
07_BL0902 (#2, 9/13/17)	2163	MGDG(16:1_18:3)+HCOO	MGDG	(16:1_18:3)	M+HCOO	C44 H75 O12	795.528	13.9943	888715	888715	888715	N	1	MS2	795.527	795.526	0.00125347	1.57565	21.6345	0.0411987	72.1149	3	A	M-FA1-FA2+2H2O-H(253.093014):MS2,FA(16:1)-H(253.217395):MS2,FA(18:3)-H(277.217503):MS2	13.975	8534000	0.96	0.98	10.71	BS	869800	0.077	0.077	13.975_869825.576_0.077_0.077_8534343.186_0.98_10.71_13.859_14.141;14.548_76106235.027_0.078_0.063_689243808.556_0.98_1288.75_14.307_14.897
07_BL0902 (#2, 9/13/17)	1854	MGDG(16:1_18:4)+HCOO	MGDG	(16:1_18:4)	M+HCOO	C44 H73 O12	793.512	12.5656	3370092	3370092	3370092	N	1	MS2	793.511	793.511	0.00098447	1.24065	36.672	0.0687439	91.6799	4	A	M-FA1-FA2+H2O-H(235.082532):MS2,M-FA1-FA2+2H2O-H(253.092764):MS2,FA(16:1)-H(253.217617):MS2,FA(16:1)-H [isotope](254.221596):MS2,FA(18:4)-H(275.201892):MS2,FA(18:4)-H [isotope](276.205683):MS2	12.532	39490000	1	0.91	732.79	SI	3903000	0	0	12.532_3903020.754_12.303_13.134_39491127.036_0.91_732.79_12.303_5318.966_12.695_5318.966
07_BL0902 (#2, 9/13/17)	2336	MGDG(18:1_18:4)+HCOO	MGDG	(18:1_18:4)	M+HCOO	C46 H77 O12	821.543	14.7246	218524	218524	218524	N	1	MS2	821.543	821.542	0.00126547	1.54036	10.4275	0.124475	52.1373	2	B	FA(18:4)-H(275.201655):MS2,FA(18:1)-H(281.248703):MS2	14.773	2640000	1	0.98	320162	SI	320200	0	0	14.773_320163.125_14.529_15.037_2640323.910_0.98_320162.12_14.529_0.000_15.029_0.000
07_BL0902 (#2, 9/13/17)	1676	MGDG(18:3_18:4)+HCOO	MGDG	(18:3_18:4)	M+HCOO	C46 H73 O12	817.512	11.5419	342060	342060	342060	N	1	MS2	817.511	817.511	0.00117847	1.44153	17.1555	0.0998641	57.185	3	A	M-FA1-FA2+2H2O-H(253.09257):MS2,FA(18:4)-H(275.201483):MS2,FA(18:3)-H(277.217557):MS2	11.541	2897000	0.92	0.94	341873	BS	305600	0.078	0.07	11.541_305592.389_0.078_0.070_2897238.541_0.94_341873.41_11.350_11.685;11.825_99005.006_0.106_0.118_1416264.044_0.62_84.19_11.690_11.995
07_BL0902 (#2, 9/13/17)	1463	MGDG(18:4_18:4)+HCOO	MGDG	(18:4_18:4)	M+HCOO	C46 H71 O12	815.496	10.3287	247053	247053	247053	N	1	MS2	815.496	815.495	0.00124447	1.52603	16.3545	0.254411	54.5151	3	A	M-FA1-FA2+2H2O-H(253.093294):MS2,FA(18:4)-H(275.201907):MS2,FA(18:4)-H [isotope](276.205922):MS2	10.351	2762000	1	0.79	287084	SI	287100	0	0	10.351_287085.039_9.238_10.637_2762400.089_0.79_287084.04_10.058_0.083_10.637_0.083;10.735_14057.125_10.644_10.839_23445.485_0.61_14056.12_10.644_0.000_10.826_0.000;10.930_8407.489_10.839_11.229_10265.743_0.55_8406.49_10.839_0.000_10.995_0.000
07_BL0902 (#2, 9/13/17)	576	MGMG(16:0)+HCOO	MGMG	(16:0)	M+HCOO	C26 H49 O11	537.328	4.09578	36358676	36358676	36358676	N	1	MS2	537.328	537.328	0.00032047	0.596414	28.279	0.210779	94.2634	3	B	M-FA(16:0)-H(235.081968):MS2,M-FA(16:0)+H2O-H(253.092703):MS2,FA(16:0)-H(255.233183):MS2	4.11	536200000	1	0.49	1283.32	SI	41190000	0	0	4.110_41192588.682_3.767_4.325_536191294.946_0.49_1283.32_3.767_32073.350_4.325_32073.350;4.412_4344426.381_4.332_4.621_31217124.159_0.65_17.74_4.332_231784.296_4.607_231784.296
07_BL0902 (#2, 9/13/17)	529	MGMG(16:0)-H	MGMG	(16:0)	M-H	C25 H47 O9	491.323	3.92737	211098	211098	211098	N	1	MS2	491.322	491.323	0.00046647	0.949417	28.3086	0.042364	94.3622	3	B	M-FA(16:0)-H(235.082472):MS2,M-FA(16:0)+H2O-H(253.092732):MS2,FA(16:0)-H(255.232788):MS2	4.106	5307000	1	0.76	458452	SI	458500	0	0	4.106_458452.658_3.817_4.305_5307444.150_0.76_458451.66_3.817_0.000_4.305_0.000;4.407_54236.863_4.305_4.538_347958.232_0.50_5.33_4.305_8566.007_4.526_8566.007
07_BL0902 (#2, 9/13/17)	374	MGMG(16:1)+HCOO	MGMG	(16:1)	M+HCOO	C26 H47 O11	535.313	3.01828	310099	310099	310099	N	1	MS2	535.312	535.312	0.00035147	0.65657	24.0982	0.295069	80.3272	3	B	M-FA(16:1)-H(235.082848):MS2,M-FA(16:1)+H2O-H(253.092934):MS2,FA(16:1)-H(253.217636):MS2	3.182	12780000	1	0.75	985475	SI	985500	0	0	3.182_985475.637_2.911_3.674_12783790.301_0.75_985474.64_2.911_0.000_3.590_0.000
07_BL0902 (#2, 9/13/17)	3666	SQDG(17:5_23:2)+HCOO	SQDG	(17:5_23:2)	M+HCOO	C50 H81 O14 S1	937.535	19.9885	2.67431e+06	2.67431e+06	2.67431e+06	N	1	MS2	937.534	937.535	-0.00037553	-0.400551	8.58103	3.83077	42.9051	2	B	SQMG(17:5)-H2O-H(541.209485):MS2,SQMG(17:5)-H2O-H [isotope](542.212846):MS2,M-H(891.530723):MS2,M-H [isotope](892.528656):MS2,M+HCOO(937.531603):MS2	19.986	14070000	1	0.98	22.95	SI	2686000	0	0	19.986_2685840.316_19.880_20.108_14073540.003_0.98_22.95_19.880_112164.895_20.105_112164.895
08_BL0902 (#2, 9/21/17)	2519	DGDG(16:0_16:0)+HCOO	DGDG	(16:0_16:0)	M+HCOO	C48 H89 O17	937.612	17.0438	1.74264e+06	1.74264e+06	1.74264e+06	N	1	MS2	937.611	937.611	0.00105147	1.12144	39.7345	0.470475	66.2242	6	A	M-FA-FA2+H2O-GAL-H(235.081997):MS2,FA(16:0)-H(255.232835):MS2,FA(16:0)-H [isotope](256.236244):MS2,M-FA1-FA2-H(379.124415):MS2,M-FA1-FA2+H2O-H(397.134939):MS2,M-FA1-FA2+H2O-H [isotope](398.138278):MS2,M-FA1-FA2+2H2O-H(415.145584):MS2	17.027	12380000	1	0.98	1.92741e+06	SI	1927000	0	0	17.027_1927407.226_16.839_17.273_12379937.674_0.98_1927406.23_16.839_0.000_17.266_0.000
08_BL0902 (#2, 9/21/17)	2089	DGDG(16:0_16:1)+HCOO	DGDG	(16:0_16:1)	M+HCOO	C48 H87 O17	935.596	15.1907	1.42677e+06	1.42677e+06	1.42677e+06	N	1	MS2	935.595	935.595	0.00115447	1.23394	39.823	0.0415973	66.3716	6	A	M-FA-FA2+H2O-GAL-H(235.081939):MS2,FA(16:1)-H(253.217254):MS2,FA(16:1)-H [isotope](254.220663):MS2,FA(16:0)-H(255.232854):MS2,FA(16:0)-H [isotope](256.236302):MS2,M-FA1-FA2-H(379.124592):MS2,M-FA1-FA2+H2O-H(397.135443):MS2,M-FA1-FA2+H2O-H [isotope](398.137681):MS2,M-FA1-FA2+2H2O-H(415.145534):MS2	15.178	11420000	1	0.99	1.56121e+06	SI	1561000	0	0	15.178_1561215.888_14.985_15.387_11422951.986_0.99_1561214.89_14.985_0.000_15.352_0.000
08_BL0902 (#2, 9/21/17)	2748	DGDG(16:0_17:0)+HCOO	DGDG	(16:0_17:0)	M+HCOO	C49 H91 O17	951.627	18.0568	231049	231049	231049	N	1	MS2	951.626	951.626	0.00082947	0.871634	36.3586	0.584887	60.5977	6	A	M-FA-FA2+H2O-GAL-H(235.08239):MS2,FA(16:0)-H(255.233017):MS2,FA(16:0)-H [isotope](256.236618):MS2,FA(17:0)-H(269.249187):MS2,FA(17:0)-H [isotope](270.336034):MS2,M-FA1-FA2-H(379.125378):MS2,M-FA1-FA2+H2O-H(397.135745):MS2,M-FA1-FA2+2H2O-H(415.146849):MS2	18.024	2535000	1	0.98	431196	SI	431200	0	0	18.024_431196.634_17.827_18.152_2534973.816_0.98_431195.63_17.858_0.000_18.147_0.000
08_BL0902 (#2, 9/21/17)	2343	DGDG(16:0_17:1)+HCOO	DGDG	(16:0_17:1)	M+HCOO	C49 H89 O17	949.611	16.2361	299046	299046	299046	N	1	MS2	949.611	949.611	0.00075047	0.790292	37.4042	0.0312293	62.3403	6	A	M-FA-FA2+H2O-GAL-H(235.082174):MS2,FA(16:0)-H(255.233259):MS2,FA(16:0)-H [isotope](256.236847):MS2,FA(17:1)-H(267.232933):MS2,FA(17:1)-H [isotope](268.236634):MS2,M-FA1-FA2-H(379.125142):MS2,M-FA1-FA2-H [isotope](380.126676):MS2,M-FA1-FA2+H2O-H(397.135338):MS2,M-FA1-FA2+2H2O-H(415.146206):MS2	16.197	2720000	1	0.99	374042	SI	374000	0	0	16.197_374042.740_15.983_16.414_2719606.952_0.99_374041.74_16.024_0.000_16.407_0.000
08_BL0902 (#2, 9/21/17)	1678	DGDG(16:0_17:3)+HCOO	DGDG	(16:0_17:3)	M+HCOO	C49 H85 O17	945.58	13.2207	185385	185385	185385	N	1	MS2	945.579	945.579	0.00077747	0.822215	29.4662	0.160549	58.9324	5	A	M-FA-FA2+H2O-GAL-H(235.082242):MS2,FA(16:0)-H(255.232918):MS2,FA(16:0)-H [isotope](256.237019):MS2,FA(17:3)-H(263.201581):MS2,FA(17:3)-H [isotope](264.205069):MS2,M-FA1-FA2-H(379.124498):MS2,M-FA1-FA2+H2O-H(397.135137):MS2	13.25	1633000	0.93	0.97	1806.18	BS	217500	0.057	0.061	13.250_217481.200_0.057_0.061_1633207.557_0.97_1806.18_13.106_13.378;13.089_3784.682_0.011_0.013_5727.936_0.93_9252.41_13.051_13.106
08_BL0902 (#2, 9/21/17)	1471	DGDG(16:0_17:4)+HCOO	DGDG	(16:0_17:4)	M+HCOO	C49 H83 O17	943.564	12.1267	171195	171195	171195	N	1	MS2	943.564	943.564	0.00090547	0.959628	31.9451	0.359116	63.8903	5	A	M-FA-FA2+H2O-GAL-H(235.081929):MS2,FA(16:0)-H(255.233028):MS2,FA(17:4)-H(261.186135):MS2,FA(17:4)-H [isotope](262.190106):MS2,M-FA1-FA2+H2O-H(397.134303):MS2,M-FA1-FA2+2H2O-H(415.144312):MS2	12.092	2142000	1	0.75	256104	SI	256100	0	0	12.092_256104.624_11.709_12.232_2142247.862_0.75_256103.62_11.734_0.000_12.224_0.000
08_BL0902 (#2, 9/21/17)	2958	DGDG(16:0_18:0)+HCOO	DGDG	(16:0_18:0)	M+HCOO	C50 H93 O17	965.643	18.999	286408	286408	286408	N	1	MS2	965.642	965.642	0.00100947	1.04539	37.7293	1.30314	62.8822	6	A	M-FA-FA2+H2O-GAL-H(235.082539):MS2,FA(16:0)-H(255.23277):MS2,FA(16:0)-H [isotope](256.236222):MS2,FA(18:0)-H(283.264183):MS2,FA(18:0)-H [isotope](284.267115):MS2,M-FA1-FA2-H(379.124408):MS2,M-FA1-FA2+H2O-H(397.135007):MS2,M-FA1-FA2+2H2O-H(415.144798):MS2	18.944	3424000	1	0.99	615730	SI	615700	0	0	18.944_615731.055_18.757_19.103_3423961.153_0.99_615730.06_18.806_0.000_19.097_0.000
08_BL0902 (#2, 9/21/17)	2566	DGDG(16:0_18:1)+HCOO	DGDG	(16:0_18:1)	M+HCOO	C50 H91 O17	963.627	17.2178	2.82737e+06	2.82737e+06	2.82737e+06	N	1	MS2	963.627	963.626	0.00112647	1.16899	39.1553	0.36243	65.2589	6	A	M-FA-FA2+H2O-GAL-H(235.082041):MS2,FA(16:0)-H(255.232939):MS2,FA(16:0)-H [isotope](256.236202):MS2,FA(18:1)-H(281.248698):MS2,FA(18:1)-H [isotope](282.251956):MS2,M-FA1-FA2-H(379.124421):MS2,M-FA1-FA2+H2O-H(397.135119):MS2,M-FA1-FA2+H2O-H [isotope](398.138201):MS2,M-FA1-FA2+2H2O-H(415.145649):MS2,M-FA1-FA2+2H2O-H [isotope](416.148856):MS2	17.173	27100000	1	0.98	708.86	SI	3501000	0	0	17.173_3501381.759_16.963_17.408_27100173.008_0.98_708.86_16.963_4932.467_17.398_4932.467
08_BL0902 (#2, 9/21/17)	2287	DGDG(16:0_18:2)+HCOO	DGDG	(16:0_18:2)	M+HCOO	C50 H89 O17	961.611	16.0132	1797594	1797594	1797594	N	1	MS2	961.611	961.611	0.00094147	0.979055	40.5357	0.0917614	67.5595	6	A	M-FA-FA2+H2O-GAL-H(235.082131):MS2,FA(16:0)-H(255.23294):MS2,FA(16:0)-H [isotope](256.236367):MS2,FA(18:2)-H(279.232929):MS2,FA(18:2)-H [isotope](280.236355):MS2,M-FA1-FA2-H(379.124378):MS2,M-FA1-FA2+H2O-H(397.135014):MS2,M-FA1-FA2+H2O-H [isotope](398.135844):MS2,M-FA1-FA2+2H2O-H(415.145413):MS2	16.017	14050000	1	0.98	206.11	SI	2188000	0	0	16.017_2187969.671_15.879_16.245_14049881.078_0.98_206.11_15.879_10564.337_16.240_10564.337
08_BL0902 (#2, 9/21/17)	1884	DGDG(16:0_18:3)+HCOO	DGDG	(16:0_18:3)	M+HCOO	C50 H87 O17	959.596	14.2806	5860758	5860758	5860758	N	1	MS2	959.595	959.595	0.00094447	0.984238	37.9566	0.2773	63.2611	6	A	M-FA-FA2+H2O-GAL-H(235.082224):MS2,FA(16:0)-H(255.233051):MS2,FA(16:0)-H [isotope](256.236367):MS2,FA(18:3)-H(277.217436):MS2,FA(18:3)-H [isotope](278.220791):MS2,M-FA1-FA2-H(379.124799):MS2,M-FA1-FA2+H2O-H(397.13537):MS2,M-FA1-FA2+H2O-H [isotope](398.138741):MS2,M-FA1-FA2+2H2O-H(415.146075):MS2	14.242	61790000	0.9	0.99	339.28	BS	6310000	0.074	0.079	14.242_6310205.328_0.074_0.079_61787948.210_0.99_339.28_14.036_14.368;14.506_2755795.481_0.091_0.092_32290003.337_0.76_64.63_14.368_14.695
08_BL0902 (#2, 9/21/17)	1643	DGDG(16:0_18:4)+HCOO	DGDG	(16:0_18:4)	M+HCOO	C50 H85 O17	957.58	13.0941	20478152	20478152	20478152	N	1	MS2	957.579	957.579	0.00069947	0.730456	38.0805	0.078796	63.4675	6	A	M-FA-FA2+H2O-GAL-H(235.081723):MS2,FA(16:0)-H(255.232817):MS2,FA(16:0)-H [isotope](256.235863):MS2,FA(18:4)-H(275.201508):MS2,FA(18:4)-H [isotope](276.205064):MS2,M-FA1-FA2-H(379.124412):MS2,M-FA1-FA2+H2O-H(397.135064):MS2,M-FA1-FA2+H2O-H [isotope](398.138056):MS2,M-FA1-FA2+2H2O-H(415.145497):MS2	13.098	208300000	0.93	0.96	320.62	BS	19520000	0.096	0.071	12.306_283248.179_0.100_0.091_3449448.887_0.89_11.36_12.146_12.415;13.098_19517728.366_0.096_0.071_208299610.152_0.96_320.62_12.851_13.403
08_BL0902 (#2, 9/21/17)	1652	DGDG(16:0_18:4)-H	DGDG	(16:0_18:4)	M-H	C49 H83 O15	911.575	13.1168	241419	241419	241419	N	1	MS2	911.574	911.574	0.00090547	0.993304	36.2987	0.101509	60.4979	6	A	M-FA-FA2+H2O-GAL-H(235.082505):MS2,FA(16:0)-H(255.233044):MS2,FA(16:0)-H [isotope](256.236304):MS2,FA(18:4)-H(275.201776):MS2,FA(18:4)-H [isotope](276.20505):MS2,M-FA1-FA2-H(379.1249):MS2,M-FA1-FA2+H2O-H(397.135509):MS2,M-FA1-FA2+H2O-H [isotope](398.139181):MS2,M-FA1-FA2+2H2O-H(415.146364):MS2	13.081	2617000	1	0.98	319526	SI	319500	0	0	13.081_319527.202_12.852_13.314_2617314.948_0.98_319526.20_12.874_0.000_13.285_0.000
08_BL0902 (#2, 9/21/17)	2310	DGDG(16:0_20:3)+HCOO	DGDG	(16:0_20:3)	M+HCOO	C52 H91 O17	987.627	16.1124	230906	230906	230906	N	1	MS2	987.626	987.626	0.00071347	0.722409	36.9096	0.460906	61.5159	6	A	M-FA-FA2+H2O-GAL-H(235.0822):MS2,FA(16:0)-H(255.232908):MS2,FA(16:0)-H [isotope](256.237067):MS2,FA(20:3)-H(305.248613):MS2,FA(20:3)-H [isotope](306.252833):MS2,M-FA1-FA2-H(379.124425):MS2,M-FA1-FA2+H2O-H(397.135433):MS2,M-FA1-FA2+2H2O-H(415.145191):MS2	16.122	1886000	1	0.96	291968	SI	292000	0	0	16.122_291968.882_15.962_16.296_1886205.234_0.96_291967.88_15.977_0.000_16.290_0.000
08_BL0902 (#2, 9/21/17)	2018	DGDG(16:0_20:4)+HCOO	DGDG	(16:0_20:4)	M+HCOO	C52 H89 O17	985.612	14.8039	1.39336e+06	1.39336e+06	1.39336e+06	N	1	MS2	985.611	985.611	0.00099047	1.00493	38.3706	0.428364	63.9509	6	A	M-FA-FA2+H2O-GAL-H(235.082184):MS2,FA(16:0)-H(255.2331):MS2,FA(16:0)-H [isotope](256.236374):MS2,FA(20:4)-H(303.233203):MS2,FA(20:4)-H [isotope](304.23679):MS2,M-FA1-FA2-H(379.124729):MS2,M-FA1-FA2+H2O-H(397.135496):MS2,M-FA1-FA2+H2O-H [isotope](398.138156):MS2,M-FA1-FA2+2H2O-H(415.145943):MS2	14.823	14810000	0.87	0.99	169.66	BS	1650000	0.066	0.074	14.823_1650212.478_0.066_0.074_14806643.721_0.99_169.66_14.647_14.989;15.008_40241.057_0.064_0.055_304768.162_0.96_0.58_14.989_15.054
08_BL0902 (#2, 9/21/17)	1498	DGDG(16:1_18:3)+HCOO	DGDG	(16:1_18:3)	M+HCOO	C50 H85 O17	957.58	12.3266	276448	276448	276448	N	1	MS2	957.58	957.579	0.00096947	1.01242	39.3039	0.688774	65.5065	6	A	M-FA-FA2+H2O-GAL-H(235.082382):MS2,FA(16:1)-H(253.217562):MS2,FA(16:1)-H [isotope](254.221742):MS2,FA(18:3)-H(277.217574):MS2,FA(18:3)-H [isotope](278.220875):MS2,M-FA1-FA2-H(379.124201):MS2,M-FA1-FA2+H2O-H(397.134633):MS2,M-FA1-FA2+2H2O-H(415.146316):MS2	12.306	3449000	0.93	0.89	11.36	BS	283200	0.1	0.091	12.306_283248.179_0.100_0.091_3449448.887_0.89_11.36_12.146_12.415;13.098_19517728.366_0.096_0.071_208299610.152_0.96_320.62_12.851_13.403
08_BL0902 (#2, 9/21/17)	1306	DGDG(16:1_18:4)+HCOO	DGDG	(16:1_18:4)	M+HCOO	C50 H83 O17	955.564	11.1076	1.69145e+06	1.69145e+06	1.69145e+06	N	1	MS2	955.563	955.564	0.00027447	0.287234	38.8627	0.217205	64.7712	6	A	M-FA-FA2+H2O-GAL-H(235.081999):MS2,FA(16:1)-H(253.217239):MS2,FA(16:1)-H [isotope](254.220879):MS2,FA(18:4)-H(275.201531):MS2,FA(18:4)-H [isotope](276.205092):MS2,M-FA1-FA2-H(379.12488):MS2,M-FA1-FA2+H2O-H(397.134846):MS2,M-FA1-FA2+H2O-H [isotope](398.138206):MS2,M-FA1-FA2+2H2O-H(415.145983):MS2	11.098	17670000	1	0.64	1.8407e+06	SI	1841000	0	0	11.098_1840697.750_10.845_11.236_17665349.867_0.64_1840696.75_10.845_0.000_11.230_0.000
08_BL0902 (#2, 9/21/17)	1180	DGDG(18:3_18:4)+HCOO	DGDG	(18:3_18:4)	M+HCOO	C52 H83 O17	979.564	10.1028	193407	193407	193407	N	1	MS2	979.564	979.564	0.00084347	0.861067	35.9254	0.382414	59.8756	6	A	M-FA-FA2+H2O-GAL-H(235.082682):MS2,FA(18:4)-H(275.201921):MS2,FA(18:4)-H [isotope](276.205516):MS2,FA(18:3)-H(277.217484):MS2,FA(18:3)-H [isotope](278.220944):MS2,M-FA1-FA2-H(379.123565):MS2,M-FA1-FA2+H2O-H(397.135915):MS2,M-FA1-FA2+2H2O-H(415.146561):MS2	10.128	2470000	0.94	0.88	235113	BS	207300	0.111	0.076	10.128_207255.652_0.111_0.076_2469781.438_0.88_235113.15_9.686_10.307;10.423_30749.447_0.152_0.190_671786.751_0.54_19701.31_10.307_10.565
08_BL0902 (#2, 9/21/17)	445	DGMG(16:0)+HCOO	DGMG	(16:0)	M+HCOO	C32 H59 O16	699.382	3.47492	176677	176677	176677	N	1	MS2	699.381	699.381	0.00093547	1.33757	7.49429	0.170247	24.981	3	B	FA(16:0)-H(255.233213):MS2,M-FA(16:0)-H(397.134231):MS2,M-FA(16:0)+H2O-H(415.146943):MS2	3.469	2248000	1	0.8	178651	SI	178700	0	0	3.469_178651.859_3.187_3.626_2247898.750_0.80_178650.86_3.187_0.000_3.626_0.000;3.708_100693.149_3.626_3.931_676769.900_0.79_100692.15_3.626_0.000_3.876_0.000
08_BL0902 (#2, 9/21/17)	2814	MGDG(16:0_16:0)+HCOO	MGDG	(16:0_16:0)	M+HCOO	C42 H79 O12	775.559	18.412	1.96313e+06	1.96313e+06	1.96313e+06	N	1	MS2	775.558	775.558	0.00084747	1.09272	37.1447	0.840869	92.8617	4	A	M-FA1-FA2+H2O-H(235.081723):MS2,M-FA1-FA2+2H2O-H(253.092754):MS2,FA(16:0)-H(255.232985):MS2,FA(16:0)-H [isotope](256.236743):MS2	18.407	11820000	1	1	258.41	SI	1949000	0	0	18.407_1948797.954_18.018_18.613_11815280.525_1.00_258.41_18.187_7512.410_18.603_7512.410
08_BL0902 (#2, 9/21/17)	2428	MGDG(16:0_16:1)+HCOO	MGDG	(16:0_16:1)	M+HCOO	C42 H77 O12	773.543	16.611	3.18199e+06	3.18199e+06	3.18199e+06	N	1	MS2	773.542	773.542	0.00094447	1.22097	39.17	0.226919	97.9249	4	A	M-FA1-FA2+H2O-H(235.081659):MS2,M-FA1-FA2+2H2O-H(253.0928):MS2,FA(16:1)-H(253.217302):MS2,FA(16:1)-H [isotope](254.220391):MS2,FA(16:0)-H(255.233078):MS2,FA(16:0)-H [isotope](256.236545):MS2	16.628	25600000	1	0.84	21655	SI	4020000	0	0	16.628_4020144.680_16.403_16.751_25598592.869_0.84_21655.05_16.420_185.636_16.746_185.636
08_BL0902 (#2, 9/21/17)	2065	MGDG(16:0_16:2)+HCOO	MGDG	(16:0_16:2)	M+HCOO	C42 H75 O12	771.527	15.071	257961	257961	257961	N	1	MS2	771.527	771.526	0.00082747	1.07251	11.1959	0.275075	55.9793	2	B	FA(16:2)-H(251.201993):MS2,FA(16:0)-H(255.233068):MS2	15.119	3305000	0.93	0.96	87.47	BS	401900	0.072	0.056	15.119_401863.347_0.072_0.056_3305419.909_0.96_87.47_14.883_15.236;15.385_143701.977_0.062_0.067_1186399.883_0.88_176514.54_15.236_15.652
08_BL0902 (#2, 9/21/17)	1799	MGDG(16:0_16:3)+HCOO	MGDG	(16:0_16:3)	M+HCOO	C42 H73 O12	769.507	13.8269	207400	207400	207400	N	1	MS2	769.506	769.511	-0.00379553	-4.93242	11.2357	0.578412	56.1784	2	B	FA(16:3)-H(249.185875):MS2,FA(16:0)-H(255.232901):MS2,FA(16:0)-H [isotope](256.235745):MS2	13.958	9996000	1	0.87	316.65	SI	1187000	0	0	13.958_1186837.833_13.710_14.272_9996150.775_0.87_316.65_13.710_3736.310_14.236_3736.310
08_BL0902 (#2, 9/21/17)	1558	MGDG(16:0_16:4)+HCOO	MGDG	(16:0_16:4)	M+HCOO	C42 H71 O12	767.496	12.6388	186809	186809	186809	N	1	MS2	767.495	767.495	0.00057447	0.7485	7.34898	1.05023	36.7449	2	B	FA(16:4)-H(247.170268):MS2,FA(16:0)-H(255.232579):MS2	12.682	1994000	1	0.96	236926	SI	276300	0	0	12.682_276256.111_12.450_12.857_1994002.545_0.96_236926.36_12.450_1.166_12.857_1.166;11.802_18311.492_11.641_11.915_103534.291_0.57_18310.49_11.641_0.000_11.915_0.000;12.231_164204.144_11.915_12.450_1291666.400_0.91_164203.14_11.915_0.000_12.450_0.000;13.061_25676.796_12.857_13.631_232630.112_0.59_25675.80_12.857_0.000_13.357_0.000
08_BL0902 (#2, 9/21/17)	3023	MGDG(16:0_17:0)+HCOO	MGDG	(16:0_17:0)	M+HCOO	C43 H81 O12	789.574	19.3185	181367	181367	181367	N	1	MS2	789.573	789.573	0.00044947	0.569257	6.19392	1.6251	30.9696	2	B	FA(16:0)-H(255.232598):MS2,FA(17:0)-H(269.248623):MS2	19.341	1398000	0.92	0.85	189416	BS	182400	0.08	0.04	19.341_182369.212_0.080_0.040_1397505.699_0.85_189416.10_19.229_19.409;19.449_147836.376_0.040_0.054_889572.566_0.80_36.13_19.409_19.524
08_BL0902 (#2, 9/21/17)	2672	MGDG(16:0_17:1)+HCOO	MGDG	(16:0_17:1)	M+HCOO	C43 H79 O12	787.559	17.5922	2.07061e+06	2.07061e+06	2.07061e+06	N	1	MS2	787.558	787.558	0.00091347	1.15988	37.25	0.0204787	93.1249	4	A	M-FA1-FA2+H2O-H(235.083135):MS2,M-FA1-FA2+2H2O-H(253.092604):MS2,FA(16:0)-H(255.232941):MS2,FA(16:0)-H [isotope](256.236274):MS2,FA(17:1)-H(267.232967):MS2,FA(17:1)-H [isotope](268.236166):MS2	17.572	14230000	1	0.96	2.33009e+06	SI	2330000	0	0	17.572_2330093.392_17.402_17.781_14228219.766_0.96_2330092.39_17.422_0.000_17.775_0.000
08_BL0902 (#2, 9/21/17)	2389	MGDG(16:0_17:2)+HCOO	MGDG	(16:0_17:2)	M+HCOO	C43 H77 O12	785.543	16.4214	874071	874071	874071	N	1	MS2	785.543	785.542	0.00105247	1.3398	23.4734	0.55003	78.2446	3	A	M-FA1-FA2+2H2O-H(253.092523):MS2,FA(16:0)-H(255.232909):MS2,FA(17:2)-H(265.217365):MS2,FA(17:2)-H [isotope](266.220712):MS2	16.39	5681000	1	0.99	898630	SI	898600	0	0	16.390_898630.500_16.240_16.570_5681257.783_0.99_898629.50_16.240_0.000_16.557_0.000
08_BL0902 (#2, 9/21/17)	2008	MGDG(16:0_17:3)+HCOO	MGDG	(16:0_17:3)	M+HCOO	C43 H75 O12	783.527	14.7545	534998	534998	534998	N	1	MS2	783.527	783.526	0.00100047	1.27688	12.8251	0.429181	64.1254	2	B	FA(16:0)-H(255.233029):MS2,FA(16:0)-H [isotope](256.236799):MS2,FA(17:3)-H(263.201831):MS2,FA(17:3)-H [isotope](264.204538):MS2	14.728	4312000	0.97	0.97	601787	BS	548700	0.066	0.057	14.728_548708.339_0.066_0.057_4311612.881_0.97_601787.48_14.563_14.842;14.933_150435.480_0.066_0.072_1322310.629_0.96_176032.10_14.842_15.135
08_BL0902 (#2, 9/21/17)	1750	MGDG(16:0_17:4)+HCOO	MGDG	(16:0_17:4)	M+HCOO	C43 H73 O12	781.512	13.5505	905724	905724	905724	N	1	MS2	781.511	781.511	0.00094547	1.2098	22.1426	0.714124	73.8087	3	A	M-FA1-FA2+2H2O-H(253.092686):MS2,FA(16:0)-H(255.23279):MS2,FA(17:4)-H(261.185891):MS2	13.575	8408000	1	0.97	977509	SI	977500	0	0	13.575_977510.422_13.232_13.846_8407887.413_0.97_977509.42_13.232_0.000_13.836_0.000
08_BL0902 (#2, 9/21/17)	3233	MGDG(16:0_18:0)+HCOO	MGDG	(16:0_18:0)	M+HCOO	C44 H83 O12	803.59	20.2385	192472	192472	192472	N	1	MS2	803.589	803.589	0.00097447	1.21265	7.93535	2.39706	39.6767	2	B	FA(16:0)-H(255.232528):MS2,FA(18:0)-H(283.264107):MS2	20.239	1107000	0.88	0.51	190718	BS	169100	0.081	0.022	20.239_169085.969_0.081_0.022_1106698.366_0.51_190718.41_20.081_20.279;20.338_190967.402_0.052_0.051_1260055.756_0.87_213274.38_20.279_20.473
08_BL0902 (#2, 9/21/17)	2831	MGDG(16:0_18:1)+HCOO	MGDG	(16:0_18:1)	M+HCOO	C44 H81 O12	801.574	18.4666	4914356	4914356	4914356	N	1	MS2	801.574	801.573	0.00069947	0.872621	38.1321	0.837756	95.3302	4	A	M-FA1-FA2+H2O-H(235.082415):MS2,M-FA1-FA2+2H2O-H(253.092684):MS2,FA(16:0)-H(255.232931):MS2,FA(16:0)-H [isotope](256.236644):MS2,FA(18:1)-H(281.248585):MS2,FA(18:1)-H [isotope](282.251543):MS2	18.515	60970000	1	0.96	2124.75	SI	7818000	0	0	18.515_7818151.032_18.267_18.745_60969194.091_0.96_2124.75_18.289_3677.832_18.737_3677.832
08_BL0902 (#2, 9/21/17)	2610	MGDG(16:0_18:2)+HCOO	MGDG	(16:0_18:2)	M+HCOO	C44 H79 O12	799.559	17.377	9581802	9581802	9581802	N	1	MS2	799.558	799.558	0.00100947	1.26253	38.028	0.151642	95.0701	4	A	M-FA1-FA2+H2O-H(235.081454):MS2,M-FA1-FA2+2H2O-H(253.092486):MS2,FA(16:0)-H(255.232796):MS2,FA(16:0)-H [isotope](256.236501):MS2,FA(18:2)-H(279.232734):MS2,FA(18:2)-H [isotope](280.235967):MS2	17.388	64100000	1	0.98	297.26	SI	12630000	0	0	17.388_12629808.369_17.206_17.585_64095878.846_0.98_297.26_17.224_42345.028_17.552_42345.028
08_BL0902 (#2, 9/21/17)	2255	MGDG(16:0_18:3)+HCOO	MGDG	(16:0_18:3)	M+HCOO	C44 H77 O12	797.543	15.8904	5.8575e+06	5.8575e+06	5.8575e+06	N	1	MS2	797.543	797.542	0.00112647	1.41243	38.0638	0.514782	95.1596	4	A	M-FA1-FA2+H2O-H(235.082427):MS2,M-FA1-FA2+2H2O-H(253.092704):MS2,FA(16:0)-H(255.233143):MS2,FA(16:0)-H [isotope](256.236536):MS2,FA(18:3)-H(277.217612):MS2,FA(18:3)-H [isotope](278.220839):MS2	15.912	49320000	0.96	0.9	157.63	BS	6385000	0.069	0.052	15.691_3753256.889_0.074_0.074_35307243.408_0.97_4156785.30_15.412_15.784;15.912_6384750.896_0.069_0.052_49321421.945_0.90_157.63_15.784_16.138
08_BL0902 (#2, 9/21/17)	1959	MGDG(16:0_18:4)+HCOO	MGDG	(16:0_18:4)	M+HCOO	C44 H75 O12	795.527	14.5673	37702644	37702644	37702644	N	1	MS2	795.527	795.526	0.00090147	1.13317	35.7971	1.23381	89.4927	4	A	M-FA1-FA2+H2O-H(235.081454):MS2,M-FA1-FA2+2H2O-H(253.092767):MS2,FA(16:0)-H(255.232854):MS2,FA(16:0)-H [isotope](256.235985):MS2,FA(18:4)-H(275.201423):MS2,FA(18:4)-H [isotope](276.204857):MS2	14.538	349200000	0.95	0.99	964.7	BS	39480000	0.068	0.071	13.984_310143.236_0.082_0.071_3025024.720_0.92_11.31_13.870_14.136;14.538_39475695.955_0.068_0.071_349151307.216_0.99_964.70_14.325_14.911
08_BL0902 (#2, 9/21/17)	3068	MGDG(16:0_19:1)+HCOO	MGDG	(16:0_19:1)	M+HCOO	C45 H83 O12	815.59	19.4709	573379	573379	573379	N	1	MS2	815.59	815.589	0.00134547	1.64969	8.96319	1.69733	44.8159	2	B	FA(16:0)-H(255.2327):MS2,FA(19:1)-H(295.264191):MS2	19.444	3774000	0.92	0.93	175.77	BS	739000	0.045	0.035	19.444_738972.557_0.045_0.035_3774198.397_0.93_175.77_19.336_19.613;19.316_142562.209_0.037_0.039_692167.039_0.33_2272.14_19.253_19.336
08_BL0902 (#2, 9/21/17)	2437	MGDG(16:0_19:3)+HCOO	MGDG	(16:0_19:3)	M+HCOO	C45 H79 O12	811.559	16.6454	175288	175288	175288	N	1	MS2	811.558	811.558	0.00083547	1.02946	8.464	0.50301	42.32	2	B	FA(16:0)-H(255.233126):MS2,FA(19:3)-H(291.233426):MS2	16.625	1092000	0.82	0.91	182002	BS	159300	0.062	0.046	16.625_159332.408_0.062_0.046_1091874.925_0.91_182002.17_16.417_16.843;16.975_35186.545_0.148_0.148_664049.287_0.47_51586.56_16.843_17.051
08_BL0902 (#2, 9/21/17)	2654	MGDG(16:0_20:3)+HCOO	MGDG	(16:0_20:3)	M+HCOO	C46 H81 O12	825.575	17.5175	908346	908346	908346	N	1	MS2	825.574	825.573	0.00126247	1.5292	23.8079	0.0536146	79.3597	3	A	M-FA1-FA2+2H2O-H(253.092891):MS2,FA(16:0)-H(255.232983):MS2,FA(16:0)-H [isotope](256.235944):MS2,FA(20:3)-H(305.248698):MS2,FA(20:3)-H [isotope](306.251929):MS2	17.504	6793000	1	0.99	1.0309e+06	SI	1031000	0	0	17.504_1030899.395_17.323_17.705_6792906.631_0.99_1030898.39_17.341_0.000_17.699_0.000
08_BL0902 (#2, 9/21/17)	2334	MGDG(16:0_20:4)+HCOO	MGDG	(16:0_20:4)	M+HCOO	C46 H79 O12	823.559	16.2003	4840649	4840649	4840649	N	1	MS2	823.558	823.558	0.00099747	1.21117	37.8981	0.183718	94.7452	4	A	M-FA1-FA2+H2O-H(235.081768):MS2,M-FA1-FA2+2H2O-H(253.092884):MS2,FA(16:0)-H(255.233083):MS2,FA(16:0)-H [isotope](256.23668):MS2,FA(20:4)-H(303.233173):MS2,FA(20:4)-H [isotope](304.236502):MS2	16.216	38790000	1	1	180.1	SI	5687000	0	0	16.216_5686979.520_16.042_16.503_38787194.881_1.00_180.10_16.042_31401.574_16.496_31401.574
08_BL0902 (#2, 9/21/17)	2100	MGDG(16:0_20:5)+HCOO	MGDG	(16:0_20:5)	M+HCOO	C46 H77 O12	821.543	15.2358	194350	194350	194350	N	1	MS2	821.542	821.542	0.00094247	1.1472	7.26793	0.439953	36.3396	2	B	FA(16:0)-H(255.232759):MS2,FA(20:5)-H(301.216927):MS2	15.518	19940000	1	0.84	263.91	SI	2124000	0	0	15.518_2123721.915_15.121_15.722_19938313.529_0.84_263.91_15.121_8016.621_15.712_8016.621
08_BL0902 (#2, 9/21/17)	2466	MGDG(16:1_18:1)+HCOO	MGDG	(16:1_18:1)	M+HCOO	C44 H79 O12	799.559	16.8182	185464	185464	185464	N	1	MS2	799.558	799.558	0.00102147	1.27754	8.0611	0.407144	40.3055	2	B	FA(16:1)-H(253.217262):MS2,FA(18:1)-H(281.248104):MS2	16.975	21690000	1	0.98	82.57	SI	2382000	0	0	16.975_2381662.045_16.669_17.201_21692929.256_0.98_82.57_16.669_28497.920_17.193_28497.920
08_BL0902 (#2, 9/21/17)	2170	MGDG(16:1_18:2)+HCOO	MGDG	(16:1_18:2)	M+HCOO	C44 H77 O12	797.544	15.5325	174054	174054	174054	N	1	MS2	797.543	797.542	0.00165947	2.08073	6.70581	0.156876	33.5291	2	B	FA(16:1)-H(253.217638):MS2,FA(18:2)-H(279.233172):MS2	15.691	35310000	0.96	0.97	4.15679e+06	BS	3753000	0.074	0.074	15.691_3753256.889_0.074_0.074_35307243.408_0.97_4156785.30_15.412_15.784;15.912_6384750.896_0.069_0.052_49321421.945_0.90_157.63_15.784_16.138
08_BL0902 (#2, 9/21/17)	1833	MGDG(16:1_18:3)+HCOO	MGDG	(16:1_18:3)	M+HCOO	C44 H75 O12	795.528	14.008	310789	310789	310789	N	1	MS2	795.527	795.526	0.00123347	1.55051	14.3589	0.674483	47.8631	3	A	M-FA1-FA2+2H2O-H(253.092917):MS2,FA(16:1)-H(253.21736):MS2,FA(18:3)-H(277.217506):MS2	13.984	3025000	0.95	0.92	11.31	BS	310100	0.082	0.071	13.984_310143.236_0.082_0.071_3025024.720_0.92_11.31_13.870_14.136;14.538_39475695.955_0.068_0.071_349151307.216_0.99_964.70_14.325_14.911
08_BL0902 (#2, 9/21/17)	1528	MGDG(16:1_18:4)+HCOO	MGDG	(16:1_18:4)	M+HCOO	C44 H73 O12	793.511	12.471	2.31972e+06	2.31972e+06	2.31972e+06	N	1	MS2	793.51	793.511	0.00010747	0.135436	34.3597	0.0600743	85.8994	4	A	M-FA1-FA2+H2O-H(235.081719):MS2,M-FA1-FA2+2H2O-H(253.092773):MS2,FA(16:1)-H(253.21731):MS2,FA(16:1)-H [isotope](254.220883):MS2,FA(18:4)-H(275.201593):MS2,FA(18:4)-H [isotope](276.205461):MS2	12.541	33790000	1	0.94	387.74	SI	3335000	0	0	12.541_3334867.930_12.262_12.985_33792762.366_0.94_387.74_12.296_8578.639_12.717_8578.639
08_BL0902 (#2, 9/21/17)	1892	MGDG(16:1_20:4)+HCOO	MGDG	(16:1_20:4)	M+HCOO	C46 H77 O12	821.543	14.3058	173197	173197	173197	N	1	MS2	821.543	821.542	0.00139347	1.69616	11.3361	0.490103	56.6806	2	B	FA(16:1)-H(253.217419):MS2,FA(20:4)-H(303.232912):MS2	14.336	2157000	1	0.98	291744	SI	291700	0	0	14.336_291744.870_14.001_14.453_2156750.995_0.98_291743.87_14.001_0.000_14.446_0.000
08_BL0902 (#2, 9/21/17)	2197	MGDG(17:0_18:4)+HCOO	MGDG	(17:0_18:4)	M+HCOO	C45 H77 O12	809.543	15.649	184514	184514	184514	N	1	MS2	809.543	809.542	0.00144647	1.78677	9.6339	0.51164	48.1695	2	B	FA(17:0)-H(269.248669):MS2,FA(18:4)-H(275.201679):MS2	15.657	1513000	1	0.98	246710	SI	246700	0	0	15.657_246710.543_15.504_15.874_1513324.550_0.98_246709.54_15.504_0.000_15.874_0.000;14.870_33813.495_14.653_14.958_211831.952_0.79_33812.50_14.653_0.000_14.958_0.000;15.087_34263.848_14.958_15.143_127649.665_0.60_3.26_14.958_8035.739_15.143_8035.739;15.271_91195.098_15.143_15.504_772680.210_0.94_91194.10_15.143_0.000_15.504_0.000;15.930_8823.533_15.874_16.099_16460.735_0.74_8822.53_15.874_0.052_…
08_BL0902 (#2, 9/21/17)	2011	MGDG(18:1_18:4)+HCOO	MGDG	(18:1_18:4)	M+HCOO	C46 H77 O12	821.544	14.7647	399178	399178	399178	N	1	MS2	821.543	821.542	0.00145247	1.76798	12.4493	0.0311691	62.2467	2	B	FA(18:4)-H(275.201596):MS2,FA(18:1)-H(281.248752):MS2,FA(18:1)-H [isotope](282.252789):MS2	14.774	4411000	1	0.97	398857	SI	398900	0	0	14.774_398858.308_14.528_14.981_4410599.928_0.97_398857.31_14.528_0.000_14.974_0.000
08_BL0902 (#2, 9/21/17)	1431	MGDG(18:3_18:4)+HCOO	MGDG	(18:3_18:4)	M+HCOO	C46 H73 O12	817.512	11.8269	147284	147284	147284	N	1	MS2	817.511	817.511	0.00118547	1.4501	12.9326	0.238267	43.1086	3	A	M-FA1-FA2+2H2O-H(253.093043):MS2,FA(18:4)-H(275.201609):MS2,FA(18:3)-H(277.217327):MS2	11.82	3120000	0.93	0.63	45.01	BS	204900	0.103	0.136	11.546_462865.606_0.090_0.068_4659099.756_0.92_489184.52_11.333_11.673;11.820_204918.104_0.103_0.136_3119513.377_0.63_45.01_11.673_11.968
08_BL0902 (#2, 9/21/17)	1216	MGDG(18:4_18:4)+HCOO	MGDG	(18:4_18:4)	M+HCOO	C46 H71 O12	815.496	10.3555	1.40684e+06	1.40684e+06	1.40684e+06	N	1	MS2	815.496	815.495	0.00127447	1.56282	24.9593	0.423369	83.1977	3	A	M-FA1-FA2+2H2O-H(253.093349):MS2,FA(18:4)-H(275.201772):MS2,FA(18:4)-H [isotope](276.205438):MS2	10.35	13370000	1	0.82	367.71	SI	1388000	0	0	10.350_1387735.699_10.104_10.671_13371871.628_0.82_367.71_10.104_3763.770_10.662_3763.770
08_BL0902 (#2, 9/21/17)	1480	MGDG(18:4_20:4)+HCOO	MGDG	(18:4_20:4)	M+HCOO	C48 H75 O12	843.527	12.1851	344496	344496	344496	N	1	MS2	843.527	843.526	0.00095047	1.12678	20.8211	0.225881	69.4037	3	A	M-FA1-FA2+2H2O-H(253.092426):MS2,M-FA1-FA2+2H2O-H [isotope](254.105992):MS2,FA(18:4)-H(275.201755):MS2,FA(20:4)-H(303.233214):MS2	12.213	3280000	1	0.92	370694	SI	370700	0	0	12.213_370695.408_11.972_12.423_3279643.268_0.92_370694.41_11.972_0.000_12.416_0.000
08_BL0902 (#2, 9/21/17)	494	MGMG(16:0)+HCOO	MGMG	(16:0)	M+HCOO	C26 H49 O11	537.328	4.03941	164594	164594	164594	N	1	MS2	537.328	537.328	0.00046147	0.858824	7.77038	0.327251	38.8519	2	B	M-FA(16:0)+H2O-H(253.09237):MS2,FA(16:0)-H(255.233293):MS2	4.099	3408000	1	0.8	17.67	SI	281400	0	0	4.099_281357.087_3.762_4.300_3407932.241_0.80_17.67_3.762_15069.083_4.300_15069.083;2.952_21560.768_2.946_3.169_6804.848_0.47_0.70_3.060_11337.889_3.169_11337.889;3.610_24229.870_3.316_3.762_246891.123_0.71_3.78_3.316_5069.114_3.653_5069.114;4.398_74029.684_4.300_4.708_546863.328_0.76_4.72_4.300_12945.446_4.605_12945.446;4.757_22080.435_4.708_4.931_38822.701_0.49_0.92_4.708_11474.772_4.844_11474.…
08_BL0902 (#2, 9/21/17)	352	MGMG(18:4)+HCOO	MGMG	(18:4)	M+HCOO	C28 H45 O11	557.297	2.66929	154077	154077	154077	N	1	MS2	557.297	557.297	0.00059347	1.06491	5.36237	0.33784	26.8119	2	B	M-FA(18:4)+H2O-H(253.093122):MS2,FA(18:4)-H(275.201557):MS2	2.587	1802000	1	0.74	180514	SI	180500	0	0	2.587_180515.027_2.345_2.848_1801948.542_0.74_180514.03_2.345_0.042_2.848_0.042;1.734_17851.030_1.582_1.792_31990.129_0.97_17850.03_1.626_0.000_1.792_0.000;1.862_4885.650_1.817_2.345_18667.739_0.96_4884.65_1.817_0.000_1.951_0.000;3.103_7209.881_2.848_3.574_77353.212_0.68_1664.51_2.848_4.329_3.211_4.329
08_BL0902 (#2, 9/21/17)	3002	SQDG(17:5_23:2)+HCOO	SQDG	(17:5_23:2)	M+HCOO	C50 H81 O14 S1	937.535	19.2276	40871668	40871668	40871668	N	1	MS2	937.534	937.535	-0.00053753	-0.573344	8.35721	2.84352	41.786	2	B	SQMG(17:5)-H2O-H(541.209852):MS2,SQMG(17:5)-H2O-H [isotope](542.212352):MS2,M-H(891.528663):MS2,M-H [isotope](892.533485):MS2,M+HCOO(937.531955):MS2	19.254	391500000	1	1	8772.96	SI	64110000	0	0	19.254_64113737.469_19.061_19.421_391453006.174_1.00_8772.96_19.095_7307.275_19.416_7307.275
09_BL0902 (#5, 9/13/17)	1396	DGDG(14:0_18:4)+HCOO	DGDG	(14:0_18:4)	M+HCOO	C48 H81 O17	929.549	10.7402	166078	166078	166078	N	1	MS2	929.549	929.548	0.00132147	1.42163	29.7884	0.358676	59.5768	5	A	FA(14:0)-H(227.201369):MS2,M-FA-FA2+H2O-GAL-H(235.082572):MS2,FA(18:4)-H(275.201459):MS2,FA(18:4)-H [isotope](276.20497):MS2,M-FA1-FA2+H2O-H(397.134309):MS2,M-FA1-FA2+2H2O-H(415.144891):MS2	10.741	1796000	1	0.66	185666	SI	185700	0	0	10.741_185666.853_10.472_10.940_1796082.475_0.66_185665.85_10.472_0.000_10.914_0.000
09_BL0902 (#5, 9/13/17)	2732	DGDG(16:0_16:0)+HCOO	DGDG	(16:0_16:0)	M+HCOO	C48 H89 O17	937.612	17.0301	3.6032e+06	3.6032e+06	3.6032e+06	N	1	MS2	937.611	937.611	0.00113847	1.21422	39.6634	0.294044	66.1057	6	A	M-FA-FA2+H2O-GAL-H(235.082146):MS2,FA(16:0)-H(255.233014):MS2,FA(16:0)-H [isotope](256.236486):MS2,M-FA1-FA2-H(379.124458):MS2,M-FA1-FA2+H2O-H(397.135314):MS2,M-FA1-FA2+H2O-H [isotope](398.138249):MS2,M-FA1-FA2+2H2O-H(415.145836):MS2	17.018	25880000	1	1	3.71633e+06	SI	3716000	0	0	17.018_3716335.708_16.844_17.314_25880618.587_1.00_3716334.71_16.844_0.000_17.240_0.000
09_BL0902 (#5, 9/13/17)	2275	DGDG(16:0_16:1)+HCOO	DGDG	(16:0_16:1)	M+HCOO	C48 H87 O17	935.596	15.1689	2.12444e+06	2.12444e+06	2.12444e+06	N	1	MS2	935.596	935.595	0.00151347	1.61765	38.9179	0.166299	64.8631	6	A	M-FA-FA2+H2O-GAL-H(235.082184):MS2,FA(16:1)-H(253.217239):MS2,FA(16:1)-H [isotope](254.220568):MS2,FA(16:0)-H(255.232843):MS2,FA(16:0)-H [isotope](256.236512):MS2,M-FA1-FA2-H(379.124653):MS2,M-FA1-FA2-H [isotope](380.127521):MS2,M-FA1-FA2+H2O-H(397.135194):MS2,M-FA1-FA2+H2O-H [isotope](398.138762):MS2,M-FA1-FA2+2H2O-H(415.14592):MS2	15.147	19550000	1	0.99	56491.6	SI	2268000	0	0	15.147_2268319.677_14.961_15.361_19545545.593_0.99_56491.64_14.980_40.152_15.355_40.152
09_BL0902 (#5, 9/13/17)	1662	DGDG(16:0_16:3)+HCOO	DGDG	(16:0_16:3)	M+HCOO	C48 H83 O17	931.565	12.3066	194802	194802	194802	N	1	MS2	931.564	931.564	0.00140347	1.50657	30.5599	0.097849	61.1199	5	A	M-FA-FA2+H2O-GAL-H(235.08275):MS2,FA(16:3)-H(249.185897):MS2,FA(16:3)-H [isotope](250.18931):MS2,FA(16:0)-H(255.233096):MS2,FA(16:0)-H [isotope](256.236636):MS2,M-FA1-FA2+H2O-H(397.13478):MS2,M-FA1-FA2+2H2O-H(415.144564):MS2,M-FA1-FA2+2H2O-H [isotope](416.151478):MS2	12.365	2432000	1	0.59	14.31	SI	244000	0	0	12.365_244007.679_12.050_12.472_2432397.964_0.59_14.31_12.050_15937.198_12.461_15937.198;11.977_66986.943_11.758_12.050_561835.187_0.71_66985.94_11.758_0.000_12.050_0.000
09_BL0902 (#5, 9/13/17)	2977	DGDG(16:0_17:0)+HCOO	DGDG	(16:0_17:0)	M+HCOO	C49 H91 O17	951.627	18.0513	207325	207325	207325	N	1	MS2	951.626	951.626	0.00074847	0.786517	35.315	1.19538	58.8584	6	A	M-FA-FA2+H2O-GAL-H(235.082156):MS2,FA(16:0)-H(255.233037):MS2,FA(17:0)-H(269.249265):MS2,M-FA1-FA2-H(379.124926):MS2,M-FA1-FA2+H2O-H(397.135154):MS2,M-FA1-FA2+H2O-H [isotope](398.13781):MS2,M-FA1-FA2+2H2O-H(415.146236):MS2	18.021	2414000	1	0.9	421390	SI	421400	0	0	18.021_421390.965_17.849_18.174_2413750.877_0.90_421389.96_17.849_0.000_18.169_0.000
09_BL0902 (#5, 9/13/17)	2541	DGDG(16:0_17:1)+HCOO	DGDG	(16:0_17:1)	M+HCOO	C49 H89 O17	949.611	16.2328	450063	450063	450063	N	1	MS2	949.611	949.611	0.00091547	0.964047	37.2027	0.211607	62.0046	6	A	M-FA-FA2+H2O-GAL-H(235.082002):MS2,FA(16:0)-H(255.23322):MS2,FA(16:0)-H [isotope](256.236768):MS2,FA(17:1)-H(267.233252):MS2,FA(17:1)-H [isotope](268.236594):MS2,M-FA1-FA2-H(379.125735):MS2,M-FA1-FA2+H2O-H(397.135445):MS2,M-FA1-FA2+H2O-H [isotope](398.138173):MS2,M-FA1-FA2+2H2O-H(415.145004):MS2	16.213	4048000	1	0.94	613649	SI	613700	0	0	16.213_613650.298_15.984_16.392_4047874.104_0.94_613649.30_16.023_0.000_16.364_0.000
09_BL0902 (#5, 9/13/17)	2247	DGDG(16:0_17:2)+HCOO	DGDG	(16:0_17:2)	M+HCOO	C49 H87 O17	947.596	15.0444	208497	208497	208497	N	1	MS2	947.595	947.595	0.00077147	0.814135	30.3025	0.0466595	60.605	5	A	M-FA-FA2+H2O-GAL-H(235.082457):MS2,FA(16:0)-H(255.232826):MS2,FA(16:0)-H [isotope](256.235705):MS2,FA(17:2)-H(265.217264):MS2,FA(17:2)-H [isotope](266.221021):MS2,M-FA1-FA2+H2O-H(397.135131):MS2,M-FA1-FA2+2H2O-H(415.145881):MS2	14.993	2171000	1	0.95	291776	SI	291800	0	0	14.993_291776.538_14.799_15.152_2170728.009_0.95_291775.54_14.816_0.000_15.146_0.000
09_BL0902 (#5, 9/13/17)	1866	DGDG(16:0_17:3)+HCOO	DGDG	(16:0_17:3)	M+HCOO	C49 H85 O17	945.58	13.2794	347950	347950	347950	N	1	MS2	945.579	945.579	0.00036947	0.390734	37.0351	0.126633	61.7252	6	A	M-FA-FA2+H2O-GAL-H(235.082093):MS2,FA(16:0)-H(255.233344):MS2,FA(16:0)-H [isotope](256.235969):MS2,FA(17:3)-H(263.202055):MS2,FA(17:3)-H [isotope](264.205297):MS2,M-FA1-FA2-H(379.125575):MS2,M-FA1-FA2+H2O-H(397.135053):MS2,M-FA1-FA2+2H2O-H(415.144829):MS2	13.281	3039000	1	0.65	364530	SI	364500	0	0	13.281_364531.492_13.010_13.388_3039054.757_0.65_364530.49_13.046_0.000_13.370_0.000
09_BL0902 (#5, 9/13/17)	1626	DGDG(16:0_17:4)+HCOO	DGDG	(16:0_17:4)	M+HCOO	C49 H83 O17	943.564	12.0695	358105	358105	358105	N	1	MS2	943.564	943.564	0.00071647	0.759323	33.7495	0.327468	56.2492	6	A	M-FA-FA2+H2O-GAL-H(235.082205):MS2,FA(16:0)-H(255.232967):MS2,FA(16:0)-H [isotope](256.236357):MS2,FA(17:4)-H(261.185994):MS2,FA(17:4)-H [isotope](262.189786):MS2,M-FA1-FA2-H(379.123878):MS2,M-FA1-FA2+H2O-H(397.135157):MS2,M-FA1-FA2+H2O-H [isotope](398.138985):MS2,M-FA1-FA2+2H2O-H(415.145564):MS2	12.094	4183000	1	0.66	475299	SI	475300	0	0	12.094_475300.163_11.712_12.229_4182921.197_0.66_475299.16_11.712_0.000_12.220_0.000
09_BL0902 (#5, 9/13/17)	3199	DGDG(16:0_18:0)+HCOO	DGDG	(16:0_18:0)	M+HCOO	C50 H93 O17	965.643	18.9605	1.37517e+06	1.37517e+06	1.37517e+06	N	1	MS2	965.642	965.642	0.00096947	1.00396	39.4958	1.76741	65.8263	6	A	M-FA-FA2+H2O-GAL-H(235.082005):MS2,FA(16:0)-H(255.232918):MS2,FA(16:0)-H [isotope](256.236331):MS2,FA(18:0)-H(283.264341):MS2,FA(18:0)-H [isotope](284.267797):MS2,M-FA1-FA2-H(379.12479):MS2,M-FA1-FA2+H2O-H(397.135508):MS2,M-FA1-FA2+H2O-H [isotope](398.138043):MS2,M-FA1-FA2+2H2O-H(415.145629):MS2	18.945	9092000	1	0.99	1.47255e+06	SI	1473000	0	0	18.945_1472554.185_18.791_19.154_9091996.858_0.99_1472553.18_18.791_0.000_19.128_0.000
09_BL0902 (#5, 9/13/17)	2789	DGDG(16:0_18:1)+HCOO	DGDG	(16:0_18:1)	M+HCOO	C50 H91 O17	963.627	17.2184	4878620	4878620	4878620	N	1	MS2	963.627	963.626	0.00095947	0.995687	39.5409	0.386946	65.9014	6	A	M-FA-FA2+H2O-GAL-H(235.081928):MS2,FA(16:0)-H(255.232671):MS2,FA(16:0)-H [isotope](256.236184):MS2,FA(18:1)-H(281.248305):MS2,FA(18:1)-H [isotope](282.251509):MS2,M-FA1-FA2-H(379.124391):MS2,M-FA1-FA2-H [isotope](380.127842):MS2,M-FA1-FA2+H2O-H(397.134707):MS2,M-FA1-FA2+H2O-H [isotope](398.138156):MS2,M-FA1-FA2+2H2O-H(415.14548):MS2	17.175	51000000	1	0.99	15073.6	SI	6787000	0	0	17.175_6787183.805_16.923_17.368_50998753.370_0.99_15073.56_16.944_450.241_17.361_450.241
09_BL0902 (#5, 9/13/17)	2472	DGDG(16:0_18:2)+HCOO	DGDG	(16:0_18:2)	M+HCOO	C50 H89 O17	961.611	15.9889	3193622	3193622	3193622	N	1	MS2	961.611	961.611	0.00075047	0.78043	41.0998	0.0365002	68.4997	6	A	M-FA-FA2+H2O-GAL-H(235.081706):MS2,FA(16:0)-H(255.232806):MS2,FA(16:0)-H [isotope](256.236123):MS2,FA(18:2)-H(279.232813):MS2,FA(18:2)-H [isotope](280.235954):MS2,M-FA1-FA2-H(379.124394):MS2,M-FA1-FA2+H2O-H(397.13489):MS2,M-FA1-FA2+H2O-H [isotope](398.138487):MS2,M-FA1-FA2+2H2O-H(415.145288):MS2	16.011	30680000	1	0.98	163.54	SI	4517000	0	0	16.011_4517430.704_15.843_16.223_30681723.046_0.98_163.54_15.843_27455.589_16.217_27455.589
09_BL0902 (#5, 9/13/17)	2064	DGDG(16:0_18:3)+HCOO	DGDG	(16:0_18:3)	M+HCOO	C50 H87 O17	959.596	14.266	11866657	11866657	11866657	N	1	MS2	959.595	959.595	0.00067247	0.700785	37.491	0.345354	62.4851	6	A	M-FA-FA2+H2O-GAL-H(235.082266):MS2,FA(16:0)-H(255.232958):MS2,FA(16:0)-H [isotope](256.236634):MS2,FA(18:3)-H(277.217338):MS2,FA(18:3)-H [isotope](278.220708):MS2,M-FA1-FA2-H(379.124379):MS2,M-FA1-FA2+H2O-H(397.135173):MS2,M-FA1-FA2+H2O-H [isotope](398.138963):MS2,M-FA1-FA2+2H2O-H(415.145794):MS2	14.248	109300000	0.93	0.9	769.71	BS	11640000	0.083	0.064	14.248_11640323.441_0.083_0.064_109306343.094_0.90_769.71_13.986_14.362;14.505_8632228.763_0.086_0.076_89253029.651_0.86_99.49_14.362_14.699
09_BL0902 (#5, 9/13/17)	1819	DGDG(16:0_18:4)+HCOO	DGDG	(16:0_18:4)	M+HCOO	C50 H85 O17	957.58	13.0758	34638364	34638364	34638364	N	1	MS2	957.579	957.579	0.00032447	0.338844	38.2989	0.00466652	63.8315	6	A	M-FA-FA2+H2O-GAL-H(235.082074):MS2,FA(16:0)-H(255.233046):MS2,FA(16:0)-H [isotope](256.236473):MS2,FA(18:4)-H(275.201693):MS2,FA(18:4)-H [isotope](276.204921):MS2,M-FA1-FA2-H(379.12451):MS2,M-FA1-FA2+H2O-H(397.135367):MS2,M-FA1-FA2+H2O-H [isotope](398.138426):MS2,M-FA1-FA2+2H2O-H(415.146247):MS2	13.099	398700000	0.9	0.94	359.48	BS	34280000	0.109	0.073	12.302_404955.252_0.099_0.095_5027657.271_0.76_3.05_12.174_12.347;12.558_359082.485_0.142_0.166_7056786.905_0.54_2.90_12.445_12.700;13.099_34281105.169_0.109_0.073_398650277.961_0.94_359.48_12.851_13.429
09_BL0902 (#5, 9/13/17)	1823	DGDG(16:0_18:4)-H	DGDG	(16:0_18:4)	M-H	C49 H83 O15	911.575	13.0918	432752	432752	432752	N	1	MS2	911.574	911.574	0.00119447	1.31034	36.2411	0.0206205	60.4018	6	A	M-FA-FA2+H2O-GAL-H(235.0822):MS2,FA(16:0)-H(255.233029):MS2,FA(16:0)-H [isotope](256.236569):MS2,FA(18:4)-H(275.201665):MS2,FA(18:4)-H [isotope](276.205012):MS2,M-FA1-FA2-H(379.124502):MS2,M-FA1-FA2+H2O-H(397.135227):MS2,M-FA1-FA2+H2O-H [isotope](398.138763):MS2,M-FA1-FA2+2H2O-H(415.145638):MS2	13.098	4892000	1	0.67	625026	SI	625000	0	0	13.098_625026.868_12.857_13.376_4892159.856_0.67_625025.87_12.857_0.000_13.286_0.000
09_BL0902 (#5, 9/13/17)	2503	DGDG(16:0_20:3)+HCOO	DGDG	(16:0_20:3)	M+HCOO	C52 H91 O17	987.626	16.1004	250384	250384	250384	N	1	MS2	987.626	987.626	0.00030747	0.311322	38.627	0.63569	64.3784	6	A	M-FA-FA2+H2O-GAL-H(235.081925):MS2,FA(16:0)-H(255.232958):MS2,FA(16:0)-H [isotope](256.236684):MS2,FA(20:3)-H(305.248237):MS2,FA(20:3)-H [isotope](306.252073):MS2,M-FA1-FA2-H(379.124416):MS2,M-FA1-FA2+H2O-H(397.13505):MS2,M-FA1-FA2+2H2O-H(415.145632):MS2	16.128	2341000	1	0.97	20566.1	SI	378700	0	0	16.128_378711.337_15.934_16.320_2341465.500_0.97_20566.14_15.952_18.413_16.308_18.413
09_BL0902 (#5, 9/13/17)	2200	DGDG(16:0_20:4)+HCOO	DGDG	(16:0_20:4)	M+HCOO	C52 H89 O17	985.611	14.8033	1716061	1716061	1716061	N	1	MS2	985.611	985.611	0.00094147	0.955215	38.8036	0.531945	64.6727	6	A	M-FA-FA2+H2O-GAL-H(235.082105):MS2,FA(16:0)-H(255.23289):MS2,FA(16:0)-H [isotope](256.236253):MS2,FA(20:4)-H(303.232971):MS2,FA(20:4)-H [isotope](304.236042):MS2,M-FA1-FA2-H(379.124521):MS2,M-FA1-FA2+H2O-H(397.135343):MS2,M-FA1-FA2+H2O-H [isotope](398.137728):MS2,M-FA1-FA2+2H2O-H(415.145821):MS2	14.81	16920000	1	0.99	264.2	SI	2268000	0	0	14.810_2267991.755_14.581_15.091_16923595.353_0.99_264.20_14.610_8552.036_15.051_8552.036
09_BL0902 (#5, 9/13/17)	2327	DGDG(16:1_18:1)+HCOO	DGDG	(16:1_18:1)	M+HCOO	C50 H89 O17	961.611	15.4378	168388	168388	168388	N	1	MS2	961.611	961.611	0.00065547	0.681638	28.8977	0.514646	48.1628	6	A	M-FA-FA2+H2O-GAL-H(235.082204):MS2,FA(16:1)-H(253.217174):MS2,FA(16:1)-H [isotope](254.220048):MS2,FA(18:1)-H(281.248617):MS2,FA(18:1)-H [isotope](282.252629):MS2,M-FA1-FA2-H(379.123839):MS2,M-FA1-FA2+H2O-H(397.135015):MS2,M-FA1-FA2+2H2O-H(415.146815):MS2	15.582	11960000	1	0.99	1.3035e+06	SI	1304000	0	0	15.582_1303500.642_15.265_15.825_11964628.338_0.99_1303499.64_15.265_0.000_15.816_0.000
09_BL0902 (#5, 9/13/17)	1660	DGDG(16:1_18:3)+HCOO	DGDG	(16:1_18:3)	M+HCOO	C50 H85 O17	957.58	12.2921	405340	405340	405340	N	1	MS2	957.579	957.579	0.00063147	0.659444	34.5099	0.779049	57.5164	6	A	M-FA-FA2+H2O-GAL-H(235.082457):MS2,FA(16:1)-H(253.217634):MS2,FA(16:1)-H [isotope](254.221489):MS2,FA(18:3)-H(277.217574):MS2,FA(18:3)-H [isotope](278.22136):MS2,M-FA1-FA2-H(379.124352):MS2,M-FA1-FA2+H2O-H(397.134817):MS2,M-FA1-FA2+H2O-H [isotope](398.13898):MS2,M-FA1-FA2+2H2O-H(415.145467):MS2	12.302	5028000	0.9	0.76	3.05	BS	405000	0.099	0.095	12.302_404955.252_0.099_0.095_5027657.271_0.76_3.05_12.174_12.347;12.558_359082.485_0.142_0.166_7056786.905_0.54_2.90_12.445_12.700;13.099_34281105.169_0.109_0.073_398650277.961_0.94_359.48_12.851_13.429
09_BL0902 (#5, 9/13/17)	1449	DGDG(16:1_18:4)+HCOO	DGDG	(16:1_18:4)	M+HCOO	C50 H83 O17	955.564	11.0919	2.9022e+06	2.9022e+06	2.9022e+06	N	1	MS2	955.563	955.564	0.00038747	0.405489	38.2142	0.179774	63.6903	6	A	M-FA-FA2+H2O-GAL-H(235.082304):MS2,FA(16:1)-H(253.217379):MS2,FA(16:1)-H [isotope](254.220503):MS2,FA(18:4)-H(275.201664):MS2,FA(18:4)-H [isotope](276.205053):MS2,M-FA1-FA2-H(379.12456):MS2,M-FA1-FA2+H2O-H(397.135126):MS2,M-FA1-FA2+H2O-H [isotope](398.13885):MS2,M-FA1-FA2+2H2O-H(415.145306):MS2,M-FA1-FA2+2H2O-H [isotope](416.14864):MS2	11.1	31090000	1	0.6	538.69	SI	3309000	0	0	11.100_3309111.082_10.819_11.259_31090086.523_0.60_538.69_10.819_6131.546_11.252_6131.546
09_BL0902 (#5, 9/13/17)	1309	DGDG(18:3_18:4)+HCOO	DGDG	(18:3_18:4)	M+HCOO	C52 H83 O17	979.564	10.143	203472	203472	203472	N	1	MS2	979.564	979.564	0.00052647	0.537454	28.7081	0.238526	57.4163	5	A	M-FA-FA2+H2O-GAL-H(235.082809):MS2,FA(18:4)-H(275.20143):MS2,FA(18:4)-H [isotope](276.204955):MS2,FA(18:3)-H(277.217341):MS2,FA(18:3)-H [isotope](278.221003):MS2,M-FA1-FA2+H2O-H(397.134988):MS2,M-FA1-FA2+2H2O-H(415.146084):MS2	10.115	2512000	1	0.77	220000	SI	220000	0	0	10.115_220001.444_9.617_10.287_2511546.396_0.77_220000.44_9.732_0.000_10.287_0.000;10.446_57518.025_10.287_10.568_449537.324_0.50_4498.10_10.287_12.784_10.568_12.784
09_BL0902 (#5, 9/13/17)	495	DGMG(16:0)+HCOO	DGMG	(16:0)	M+HCOO	C32 H59 O16	699.381	3.70629	481363	481363	481363	N	1	MS2	699.381	699.381	0.00054347	0.777073	13.6112	0.096858	34.028	4	B	M-FA(16:0)-GAL-H(235.081972):MS2,FA(16:0)-H(255.232853):MS2,M-FA(16:0)-H(397.134987):MS2,M-FA(16:0)+H2O-H(415.146793):MS2	3.73	4342000	1	0.65	166.97	SI	582900	0	0	3.474_1510959.467_3.190_3.631_19003055.937_0.82_1510958.47_3.190_0.000_3.631_0.000;3.730_582908.471_3.631_3.927_4342060.514_0.65_166.97_3.631_3470.410_3.916_3470.410
09_BL0902 (#5, 9/13/17)	1648	MGDG(14:0_18:4)+HCOO	MGDG	(14:0_18:4)	M+HCOO	C42 H71 O12	767.496	12.2154	225929	225929	225929	N	1	MS2	767.495	767.495	0.00090047	1.17326	9.9682	0.663643	49.841	2	B	FA(14:0)-H(227.201339):MS2,FA(18:4)-H(275.201716):MS2	12.179	2323000	1	0.75	237995	SI	238000	0	0	12.179_237996.183_12.013_12.411_2322614.184_0.75_237995.18_12.013_0.000_12.380_0.000
09_BL0902 (#5, 9/13/17)	3051	MGDG(16:0_16:0)+HCOO	MGDG	(16:0_16:0)	M+HCOO	C42 H79 O12	775.559	18.4036	3.83249e+06	3.83249e+06	3.83249e+06	N	1	MS2	775.558	775.558	0.00088947	1.14688	38.7542	1.56532	96.8854	4	A	M-FA1-FA2+H2O-H(235.082059):MS2,M-FA1-FA2+2H2O-H(253.092549):MS2,FA(16:0)-H(255.232717):MS2,FA(16:0)-H [isotope](256.236177):MS2	18.386	26740000	1	0.99	654.31	SI	4266000	0	0	18.386_4266016.412_18.150_18.694_26738448.946_0.99_654.31_18.231_6509.897_18.655_6509.897
09_BL0902 (#5, 9/13/17)	2629	MGDG(16:0_16:1)+HCOO	MGDG	(16:0_16:1)	M+HCOO	C42 H77 O12	773.543	16.6018	6761027	6761027	6761027	N	1	MS2	773.542	773.542	0.00085347	1.10333	38.3065	0.355584	95.7662	4	A	M-FA1-FA2+H2O-H(235.082132):MS2,M-FA1-FA2+2H2O-H(253.092904):MS2,FA(16:1)-H(253.217293):MS2,FA(16:1)-H [isotope](254.22063):MS2,FA(16:0)-H(255.232905):MS2,FA(16:0)-H [isotope](256.236118):MS2	16.628	58520000	1	0.93	106141	SI	8591000	0	0	16.628_8591025.920_16.396_16.779_58522205.936_0.93_106140.73_16.414_80.939_16.773_80.939
09_BL0902 (#5, 9/13/17)	2250	MGDG(16:0_16:2)+HCOO	MGDG	(16:0_16:2)	M+HCOO	C42 H75 O12	771.527	15.0605	307626	307626	307626	N	1	MS2	771.527	771.526	0.00097947	1.26952	15.6566	0.162985	52.1886	3	A	FA(16:2)-H(251.201675):MS2,M-FA1-FA2+2H2O-H(253.092296):MS2,FA(16:0)-H(255.232967):MS2	15.11	4141000	0.95	0.99	36.52	BS	508700	0.067	0.06	15.110_508659.153_0.067_0.060_4141001.308_0.99_36.52_14.849_15.261;15.381_187820.819_0.066_0.076_1703176.730_0.96_8.90_15.261_15.501
09_BL0902 (#5, 9/13/17)	1982	MGDG(16:0_16:3)+HCOO	MGDG	(16:0_16:3)	M+HCOO	C42 H73 O12	769.508	13.8641	488378	488378	488378	N	1	MS2	769.507	769.511	-0.00320453	-4.16439	12.7841	0.593188	63.9205	2	B	FA(16:3)-H(249.186009):MS2,FA(16:0)-H(255.233212):MS2,FA(16:0)-H [isotope](256.236475):MS2	13.959	8130000	1	0.81	756885	SI	756900	0	0	13.959_756886.329_13.494_14.214_8129968.368_0.81_756885.33_13.494_0.000_14.202_0.000
09_BL0902 (#5, 9/13/17)	1728	MGDG(16:0_16:4)+HCOO	MGDG	(16:0_16:4)	M+HCOO	C42 H71 O12	767.496	12.6317	183625	183625	183625	N	1	MS2	767.496	767.495	0.00103247	1.34525	8.52784	1.07994	42.6392	2	B	FA(16:4)-H(247.170328):MS2,FA(16:0)-H(255.232894):MS2	12.674	2352000	1	0.9	4462.59	SI	341700	0	0	12.674_341719.277_12.470_12.799_2351780.833_0.90_4462.59_12.501_76.557_12.793_76.557
09_BL0902 (#5, 9/13/17)	3322	MGDG(16:0_17:0)+HCOO	MGDG	(16:0_17:0)	M+HCOO	C43 H81 O12	789.574	19.4478	262336	262336	262336	N	1	MS2	789.574	789.573	0.00085747	1.08599	14.2263	2.27262	71.1315	2	B	FA(16:0)-H(255.232965):MS2,FA(17:0)-H(269.248776):MS2,FA(17:0)-H [isotope](270.252881):MS2	19.455	1815000	0.89	0.9	376461	BS	330400	0.041	0.045	19.337_186708.325_0.088_0.037_1499245.948_0.67_237542.11_19.236_19.396;19.455_330350.889_0.041_0.045_1814666.274_0.90_376461.00_19.396_19.586
09_BL0902 (#5, 9/13/17)	2895	MGDG(16:0_17:1)+HCOO	MGDG	(16:0_17:1)	M+HCOO	C43 H79 O12	787.558	17.5953	1.73569e+06	1.73569e+06	1.73569e+06	N	1	MS2	787.558	787.558	0.00076747	0.974493	25.7028	0.768465	85.6759	3	A	M-FA1-FA2+2H2O-H(253.0935):MS2,FA(16:0)-H(255.232921):MS2,FA(16:0)-H [isotope](256.236491):MS2,FA(17:1)-H(267.233327):MS2,FA(17:1)-H [isotope](268.237016):MS2	17.583	12930000	1	0.98	1.93047e+06	SI	1930000	0	0	17.583_1930471.444_17.362_17.775_12929563.609_0.98_1930470.44_17.401_0.000_17.768_0.000
09_BL0902 (#5, 9/13/17)	2588	MGDG(16:0_17:2)+HCOO	MGDG	(16:0_17:2)	M+HCOO	C43 H77 O12	785.543	16.4187	851090	851090	851090	N	1	MS2	785.543	785.542	0.00099547	1.26724	22.7505	0.652875	75.835	3	A	M-FA1-FA2+2H2O-H(253.09324):MS2,FA(16:0)-H(255.232972):MS2,FA(17:2)-H(265.217415):MS2,FA(17:2)-H [isotope](266.219756):MS2	16.388	6020000	1	0.98	865129	SI	865100	0	0	16.388_865130.348_16.198_16.576_6020412.408_0.98_865129.35_16.234_0.000_16.570_0.000
09_BL0902 (#5, 9/13/17)	2190	MGDG(16:0_17:3)+HCOO	MGDG	(16:0_17:3)	M+HCOO	C43 H75 O12	783.527	14.7614	497969	497969	497969	N	1	MS2	783.527	783.526	0.00078347	0.999928	12.9157	0.338102	64.5786	2	B	FA(16:0)-H(255.232742):MS2,FA(16:0)-H [isotope](256.235868):MS2,FA(17:3)-H(263.201424):MS2	14.722	4648000	0.94	0.98	655987	BS	586600	0.064	0.06	14.722_586601.700_0.064_0.060_4647827.571_0.98_655986.95_14.536_14.836;14.941_209816.885_0.076_0.076_2048907.557_0.83_527.42_14.836_15.132
09_BL0902 (#5, 9/13/17)	1920	MGDG(16:0_17:4)+HCOO	MGDG	(16:0_17:4)	M+HCOO	C43 H73 O12	781.512	13.552	1.12412e+06	1.12412e+06	1.12412e+06	N	1	MS2	781.511	781.511	0.00088647	1.1343	21.2336	0.642199	70.7788	3	A	M-FA1-FA2+2H2O-H(253.093167):MS2,FA(16:0)-H(255.233124):MS2,FA(16:0)-H [isotope](256.235585):MS2,FA(17:4)-H(261.18647):MS2,FA(17:4)-H [isotope](262.18867):MS2	13.569	9240000	1	0.97	1.1635e+06	SI	1164000	0	0	13.569_1163501.275_13.269_13.873_9240181.628_0.97_1163500.27_13.269_0.000_13.863_0.000
09_BL0902 (#5, 9/13/17)	3491	MGDG(16:0_18:0)+HCOO	MGDG	(16:0_18:0)	M+HCOO	C44 H83 O12	803.59	20.1857	235336	235336	235336	N	1	MS2	803.589	803.589	0.00087047	1.08323	15.3003	2.87485	51.0011	3	A	M-FA1-FA2+2H2O-H(253.091903):MS2,FA(16:0)-H(255.232784):MS2,FA(18:0)-H(283.264025):MS2	20.219	3932000	0.87	0.58	58728.9	BS	505700	0.081	0.041	20.219_505733.266_0.081_0.041_3932430.603_0.58_58728.92_20.073_20.268;20.331_832661.601_0.042_0.065_5681243.174_0.94_903480.38_20.268_20.466
09_BL0902 (#5, 9/13/17)	3093	MGDG(16:0_18:1)+HCOO	MGDG	(16:0_18:1)	M+HCOO	C44 H81 O12	801.574	18.5493	12661530	12661530	12661530	N	1	MS2	801.573	801.573	0.00069047	0.861393	37.7827	1.49246	94.4568	4	A	M-FA1-FA2+H2O-H(235.082206):MS2,M-FA1-FA2+2H2O-H(253.093036):MS2,FA(16:0)-H(255.232942):MS2,FA(16:0)-H [isotope](256.236727):MS2,FA(18:1)-H(281.248774):MS2,FA(18:1)-H [isotope](282.252146):MS2	18.519	129600000	1	0.98	1.61382e+07	SI	16140000	0	0	18.519_16138197.073_18.281_18.739_129595845.333_0.98_16138196.07_18.281_0.000_18.732_0.000
09_BL0902 (#5, 9/13/17)	2837	MGDG(16:0_18:2)+HCOO	MGDG	(16:0_18:2)	M+HCOO	C44 H79 O12	799.559	17.3885	16199148	16199148	16199148	N	1	MS2	799.558	799.558	0.00085547	1.06993	37.6001	0.573029	94.0004	4	A	M-FA1-FA2+H2O-H(235.082172):MS2,M-FA1-FA2+2H2O-H(253.093048):MS2,FA(16:0)-H(255.233226):MS2,FA(16:0)-H [isotope](256.236751):MS2,FA(18:2)-H(279.233229):MS2,FA(18:2)-H [isotope](280.23654):MS2	17.386	87960000	1	0.92	221.61	SI	16440000	0	0	17.386_16441866.122_17.246_17.588_87963041.497_0.92_221.61_17.246_73857.899_17.580_73857.899
09_BL0902 (#5, 9/13/17)	2442	MGDG(16:0_18:3)+HCOO	MGDG	(16:0_18:3)	M+HCOO	C44 H77 O12	797.543	15.8872	15576738	15576738	15576738	N	1	MS2	797.542	797.542	0.00090747	1.13783	38.3527	0.410002	95.8818	4	A	M-FA1-FA2+H2O-H(235.082107):MS2,M-FA1-FA2+2H2O-H(253.092695):MS2,FA(16:0)-H(255.232903):MS2,FA(16:0)-H [isotope](256.236392):MS2,FA(18:3)-H(277.217165):MS2,FA(18:3)-H [isotope](278.220452):MS2	15.894	125200000	0.95	0.98	122.64	BS	15950000	0.057	0.066	15.681_6808939.114_0.070_0.070_60765503.197_0.97_192.97_15.463_15.772;15.894_15946476.977_0.057_0.066_125155622.422_0.98_122.64_15.772_16.129
09_BL0902 (#5, 9/13/17)	2133	MGDG(16:0_18:4)+HCOO	MGDG	(16:0_18:4)	M+HCOO	C44 H75 O12	795.527	14.5401	82947808	82947808	82947808	N	1	MS2	795.527	795.526	0.00072547	0.911937	35.8901	0.539214	89.7252	4	A	M-FA1-FA2+H2O-H(235.082154):MS2,M-FA1-FA2+2H2O-H(253.092914):MS2,FA(16:0)-H(255.232824):MS2,FA(16:0)-H [isotope](256.236323):MS2,FA(18:4)-H(275.201719):MS2,FA(18:4)-H [isotope](276.204816):MS2	14.538	660500000	1	0.99	2533.83	SI	82330000	0	0	13.773_225789.329_13.540_13.832_1446139.485_0.59_4.46_13.540_41362.032_13.795_41362.032;12.514_142852.587_4.278_12.659_1411018.927_0.95_14.00_12.404_9523.056_12.659_9523.056;13.955_687895.124_13.832_14.283_5431677.285_0.99_16.32_13.832_39725.984_14.181_39725.984;14.538_82325138.013_14.283_15.091_660515363.560_0.99_2533.83_14.283_32477.534_15.048_32477.534;15.273_4012859.378_15.091_23.968_51879784…
09_BL0902 (#5, 9/13/17)	2122	MGDG(16:0_18:4)-H	MGDG	(16:0_18:4)	M-H	C43 H73 O10	749.52	14.493	125560	125560	125560	N	1	MS2	749.519	749.521	-0.00100353	-1.3389	28.2544	0.492147	94.1814	3	A	M-FA1-FA2+2H2O-H(253.092839):MS2,FA(16:0)-H(255.233064):MS2,FA(16:0)-H [isotope](256.237107):MS2,FA(18:4)-H(275.201796):MS2,FA(18:4)-H [isotope](276.205419):MS2	14.538	1969000	0.92	0.91	281183	BS	237400	0.066	0.064	14.538_237413.707_0.066_0.064_1969024.201_0.91_281183.08_14.342_14.679;14.707_7549.923_0.022_0.025_22484.441_0.59_15939.59_14.679_14.795
09_BL0902 (#5, 9/13/17)	3323	MGDG(16:0_19:1)+HCOO	MGDG	(16:0_19:1)	M+HCOO	C45 H83 O12	815.59	19.4534	581316	581316	581316	N	1	MS2	815.59	815.589	0.00132047	1.61904	16.1272	2.18804	53.7573	3	A	M-FA1-FA2+2H2O-H(253.092378):MS2,FA(16:0)-H(255.232796):MS2,FA(19:1)-H(295.263713):MS2	19.443	3179000	0.94	0.86	163.64	BS	519600	0.059	0.037	19.443_519649.523_0.059_0.037_3179350.506_0.86_163.64_19.325_19.617;19.305_148116.198_0.039_0.043_775195.769_0.85_9468.73_19.238_19.325
09_BL0902 (#5, 9/13/17)	2634	MGDG(16:0_19:3)+HCOO	MGDG	(16:0_19:3)	M+HCOO	C45 H79 O12	811.559	16.6162	181585	181585	181585	N	1	MS2	811.558	811.558	0.00093047	1.14652	7.35481	0.0125389	36.7741	2	B	FA(16:0)-H(255.233128):MS2,FA(19:3)-H(291.233285):MS2	16.625	1549000	0.86	0.93	218850	BS	181700	0.081	0.052	16.625_181680.999_0.081_0.052_1549307.506_0.93_218849.69_16.429_16.843;16.888_28080.094_0.070_0.069_249991.256_0.93_39267.39_16.843_17.095
09_BL0902 (#5, 9/13/17)	2879	MGDG(16:0_20:3)+HCOO	MGDG	(16:0_20:3)	M+HCOO	C46 H81 O12	825.575	17.536	846462	846462	846462	N	1	MS2	825.574	825.573	0.00119147	1.4432	23.9883	0.697688	79.9611	3	A	M-FA1-FA2+2H2O-H(253.092584):MS2,FA(16:0)-H(255.232708):MS2,FA(16:0)-H [isotope](256.236196):MS2,FA(20:3)-H(305.248371):MS2,FA(20:3)-H [isotope](306.25171):MS2	17.508	7726000	1	0.99	1.12941e+06	SI	1129000	0	0	17.508_1129414.640_17.297_17.766_7725729.736_0.99_1129413.64_17.320_0.000_17.718_0.000
09_BL0902 (#5, 9/13/17)	2531	MGDG(16:0_20:4)+HCOO	MGDG	(16:0_20:4)	M+HCOO	C46 H79 O12	823.559	16.1946	3612961	3612961	3612961	N	1	MS2	823.558	823.558	0.00098047	1.19053	37.6064	0.0515363	94.016	4	A	M-FA1-FA2+H2O-H(235.081809):MS2,M-FA1-FA2+2H2O-H(253.092857):MS2,FA(16:0)-H(255.233269):MS2,FA(16:0)-H [isotope](256.236396):MS2,FA(20:4)-H(303.233298):MS2,FA(20:4)-H [isotope](304.236699):MS2	16.218	32840000	0.98	0.99	165.39	BS	4252000	0.063	0.058	15.888_151219.989_0.072_0.080_1471486.847_0.98_4.96_15.738_16.018;16.218_4251789.681_0.063_0.058_32835563.686_0.99_165.39_16.018_16.505
09_BL0902 (#5, 9/13/17)	2291	MGDG(16:0_20:5)+HCOO	MGDG	(16:0_20:5)	M+HCOO	C46 H77 O12	821.543	15.2476	199972	199972	199972	N	1	MS2	821.542	821.542	0.00055847	0.679783	8.60904	0.350115	43.0452	2	B	FA(16:0)-H(255.233489):MS2,FA(20:5)-H(301.218152):MS2	15.471	38460000	1	0.91	558.78	SI	4316000	0	0	15.471_4315552.387_15.147_15.719_38460478.832_0.91_558.78_15.147_7709.432_15.687_7709.432
09_BL0902 (#5, 9/13/17)	2666	MGDG(16:1_18:1)+HCOO	MGDG	(16:1_18:1)	M+HCOO	C44 H79 O12	799.559	16.749	192004	192004	192004	N	1	MS2	799.558	799.558	0.00103947	1.30006	8.99291	0.066411	44.9646	2	B	FA(16:1)-H(253.217151):MS2,FA(18:1)-H(281.24861):MS2	16.975	39670000	1	0.96	3.80869e+06	SI	3809000	0	0	16.975_3808689.549_16.628_17.231_39668011.350_0.96_3808688.55_16.628_0.000_17.222_0.000
09_BL0902 (#5, 9/13/17)	2343	MGDG(16:1_18:2)+HCOO	MGDG	(16:1_18:2)	M+HCOO	C44 H77 O12	797.543	15.5287	320463	320463	320463	N	1	MS2	797.543	797.542	0.00125147	1.56916	15.5417	0.0514328	51.8057	3	A	M-FA1-FA2+2H2O-H(253.093242):MS2,FA(16:1)-H(253.217389):MS2,FA(18:2)-H(279.233038):MS2	15.681	60770000	0.95	0.97	192.97	BS	6809000	0.07	0.07	15.681_6808939.114_0.070_0.070_60765503.197_0.97_192.97_15.463_15.772;15.894_15946476.977_0.057_0.066_125155622.422_0.98_122.64_15.772_16.129
09_BL0902 (#5, 9/13/17)	2006	MGDG(16:1_18:3)+HCOO	MGDG	(16:1_18:3)	M+HCOO	C44 H75 O12	795.527	13.9825	629300	629300	629300	N	1	MS2	795.527	795.526	0.00073247	0.920736	21.15	0.0183175	70.4999	3	A	M-FA1-FA2+2H2O-H(253.092922):MS2,FA(16:1)-H(253.217306):MS2,FA(18:3)-H(277.217369):MS2,FA(18:3)-H [isotope](278.22082):MS2	13.955	5432000	1	0.99	16.32	SI	687900	0	0	13.773_225789.329_13.540_13.832_1446139.485_0.59_4.46_13.540_41362.032_13.795_41362.032;12.514_142852.587_4.278_12.659_1411018.927_0.95_14.00_12.404_9523.056_12.659_9523.056;13.955_687895.124_13.832_14.283_5431677.285_0.99_16.32_13.832_39725.984_14.181_39725.984;14.538_82325138.013_14.283_15.091_660515363.560_0.99_2533.83_14.283_32477.534_15.048_32477.534;15.273_4012859.378_15.091_23.968_51879784…
09_BL0902 (#5, 9/13/17)	1697	MGDG(16:1_18:4)+HCOO	MGDG	(16:1_18:4)	M+HCOO	C44 H73 O12	793.512	12.4743	3.02627e+06	3.02627e+06	3.02627e+06	N	1	MS2	793.511	793.511	0.00102247	1.28854	37.1844	0.00299134	92.9611	4	A	M-FA1-FA2+H2O-H(235.08209):MS2,M-FA1-FA2+2H2O-H(253.092922):MS2,FA(16:1)-H(253.21724):MS2,FA(16:1)-H [isotope](254.220185):MS2,FA(18:4)-H(275.20166):MS2,FA(18:4)-H [isotope](276.204709):MS2	12.521	39870000	0.82	0.97	4.01112e+06	BS	3497000	0.102	0.077	12.521_3496874.265_0.102_0.077_39867013.726_0.97_4011123.44_12.264_12.718;13.467_2145955.975_0.137_0.118_34965510.211_0.81_65.64_13.187_13.664
09_BL0902 (#5, 9/13/17)	2444	MGDG(18:1_18:3)+HCOO	MGDG	(18:1_18:3)	M+HCOO	C46 H79 O12	823.558	15.8917	184606	184606	184606	N	1	MS2	823.558	823.558	0.00048947	0.594336	8.09817	0.354457	40.4908	2	B	FA(18:3)-H(277.217132):MS2,FA(18:1)-H(281.248902):MS2	15.888	1471000	0.98	0.98	4.96	BS	151200	0.072	0.08	15.888_151219.989_0.072_0.080_1471486.847_0.98_4.96_15.738_16.018;16.218_4251789.681_0.063_0.058_32835563.686_0.99_165.39_16.018_16.505
09_BL0902 (#5, 9/13/17)	2192	MGDG(18:1_18:4)+HCOO	MGDG	(18:1_18:4)	M+HCOO	C46 H77 O12	821.543	14.7694	358759	358759	358759	N	1	MS2	821.542	821.542	0.00095047	1.15693	17.4104	0.12809	58.0345	3	A	M-FA1-FA2+2H2O-H(253.093493):MS2,FA(18:4)-H(275.201598):MS2,FA(18:1)-H(281.248656):MS2	14.775	4168000	1	0.95	441761	SI	441800	0	0	14.775_441762.377_14.509_14.985_4167787.546_0.95_441761.38_14.509_0.000_14.977_0.000
09_BL0902 (#5, 9/13/17)	1555	MGDG(18:3_18:4)+HCOO	MGDG	(18:3_18:4)	M+HCOO	C46 H73 O12	817.511	11.602	314542	314542	314542	N	1	MS2	817.511	817.511	0.00067847	0.829922	12.6753	0.0502783	63.3765	2	B	FA(18:4)-H(275.201552):MS2,FA(18:3)-H(277.217293):MS2	11.55	4716000	1	0.77	524303	SI	524300	0	0	11.550_524304.188_11.314_11.673_4715534.817_0.77_524303.19_11.314_0.000_11.673_0.000;11.771_141218.071_11.673_11.966_1326442.176_0.72_914.73_11.673_154.214_11.956_154.214
09_BL0902 (#5, 9/13/17)	1346	MGDG(18:4_18:4)+HCOO	MGDG	(18:4_18:4)	M+HCOO	C46 H71 O12	815.496	10.3739	409545	409545	409545	N	1	MS2	815.496	815.495	0.00111947	1.37275	16.8973	0.577327	56.3243	3	A	M-FA1-FA2+2H2O-H(253.093036):MS2,FA(18:4)-H(275.201571):MS2,FA(18:4)-H [isotope](276.203943):MS2	10.35	5453000	1	0.49	580040	SI	580000	0	0	10.350_580040.815_10.058_10.475_5453303.510_0.49_580039.82_10.078_0.000_10.468_0.000
09_BL0902 (#5, 9/13/17)	1643	MGDG(18:4_20:4)+HCOO	MGDG	(18:4_20:4)	M+HCOO	C48 H75 O12	843.528	12.1827	155979	155979	155979	N	1	MS2	843.527	843.526	0.00116947	1.3864	8.8751	0.294604	44.3755	2	B	FA(18:4)-H(275.20194):MS2,FA(20:4)-H(303.232918):MS2	12.179	1367000	1	0.98	161848	SI	161800	0	0	12.179_161849.394_11.965_12.395_1366771.777_0.98_161848.39_11.985_0.475_12.389_0.475
09_BL0902 (#5, 9/13/17)	538	MGMG(16:0)+HCOO	MGMG	(16:0)	M+HCOO	C26 H49 O11	537.328	4.04519	3.61531e+06	3.61531e+06	3.61531e+06	N	1	MS2	537.328	537.328	8.447e-05	0.157204	27.87	0.0549476	92.8999	3	B	M-FA(16:0)-H(235.082115):MS2,M-FA(16:0)+H2O-H(253.092999):MS2,FA(16:0)-H(255.23312):MS2	4.111	66600000	1	0.74	286.13	SI	5139000	0	0	4.111_5139146.935_3.800_4.312_66595909.566_0.74_286.13_3.800_17898.305_4.312_17898.305;4.381_1112605.022_4.318_4.599_8230823.812_0.71_24.99_4.318_42805.499_4.582_42805.499
09_BL0902 (#5, 9/13/17)	418	MGMG(16:1)+HCOO	MGMG	(16:1)	M+HCOO	C26 H47 O11	535.313	3.12076	240869	240869	240869	N	1	MS2	535.312	535.312	0.00018647	0.348339	22.5859	0.29843	75.2863	3	B	M-FA(16:1)-H(235.083423):MS2,M-FA(16:1)+H2O-H(253.092852):MS2,FA(16:1)-H(253.217559):MS2	3.207	6051000	1	0.95	395821	SI	395800	0	0	3.207_395821.550_2.935_3.704_6051445.640_0.95_395820.55_2.935_0.000_3.686_0.000
09_BL0902 (#5, 9/13/17)	3261	SQDG(17:5_23:2)+HCOO	SQDG	(17:5_23:2)	M+HCOO	C50 H81 O14 S1	937.535	19.2301	46406256	46406256	46406256	N	1	MS2	937.534	937.535	-0.00051253	-0.546679	8.68748	2.98394	43.4374	2	B	SQMG(17:5)-H2O-H(541.210064):MS2,SQMG(17:5)-H2O-H [isotope](542.212647):MS2,M-H(891.528336):MS2,M-H [isotope](892.531105):MS2,M+HCOO(937.535539):MS2	19.255	431700000	1	0.99	1547.82	SI	71760000	0	0	19.255_71760364.968_19.046_19.567_431665166.228_0.99_1547.82_19.096_46332.236_19.510_46332.236
10_BL0902 (#5, 9/21/17)	2249	DGDG(16:0_16:0)+HCOO	DGDG	(16:0_16:0)	M+HCOO	C48 H89 O17	937.611	17.0368	1.23614e+06	1.23614e+06	1.23614e+06	N	1	MS2	937.611	937.611	0.00069847	0.744947	40.0854	0.772868	66.809	6	A	M-FA-FA2+H2O-GAL-H(235.082211):MS2,FA(16:0)-H(255.232823):MS2,FA(16:0)-H [isotope](256.236345):MS2,M-FA1-FA2-H(379.124379):MS2,M-FA1-FA2+H2O-H(397.135094):MS2,M-FA1-FA2+H2O-H [isotope](398.137529):MS2,M-FA1-FA2+2H2O-H(415.145599):MS2	17.024	8741000	1	0.99	147302	SI	1423000	0	0	17.024_1423377.907_16.831_17.202_8740756.723_0.99_147301.94_16.848_9.663_17.196_9.663
10_BL0902 (#5, 9/21/17)	1887	DGDG(16:0_16:1)+HCOO	DGDG	(16:0_16:1)	M+HCOO	C48 H87 O17	935.596	15.2011	723087	723087	723087	N	1	MS2	935.596	935.595	0.00124947	1.33548	39.6913	0.055547	66.1522	6	A	M-FA-FA2+H2O-GAL-H(235.082):MS2,FA(16:1)-H(253.217421):MS2,FA(16:1)-H [isotope](254.22022):MS2,FA(16:0)-H(255.232978):MS2,FA(16:0)-H [isotope](256.235943):MS2,M-FA1-FA2-H(379.124654):MS2,M-FA1-FA2+H2O-H(397.135317):MS2,M-FA1-FA2+H2O-H [isotope](398.139373):MS2,M-FA1-FA2+2H2O-H(415.146037):MS2	15.176	5944000	1	0.99	146083	SI	787200	0	0	15.176_787152.289_14.978_15.359_5943797.583_0.99_146083.29_15.014_5.388_15.353_5.388
10_BL0902 (#5, 9/21/17)	2429	DGDG(16:0_17:0)+HCOO	DGDG	(16:0_17:0)	M+HCOO	C49 H91 O17	951.627	17.9744	197828	197828	197828	N	1	MS2	951.626	951.626	0.00067047	0.704552	36.3556	1.57383	60.5926	6	A	M-FA-FA2+H2O-GAL-H(235.08262):MS2,FA(16:0)-H(255.232934):MS2,FA(16:0)-H [isotope](256.235846):MS2,FA(17:0)-H(269.248562):MS2,FA(17:0)-H [isotope](270.253212):MS2,M-FA1-FA2-H(379.124119):MS2,M-FA1-FA2+H2O-H(397.134856):MS2,M-FA1-FA2+2H2O-H(415.145638):MS2	18.018	2082000	1	0.95	356863	SI	356900	0	0	18.018_356864.183_17.858_18.156_2081616.256_0.95_356863.18_17.872_0.000_18.152_0.000
10_BL0902 (#5, 9/21/17)	2090	DGDG(16:0_17:1)+HCOO	DGDG	(16:0_17:1)	M+HCOO	C49 H89 O17	949.611	16.1844	192937	192937	192937	N	1	MS2	949.611	949.611	0.00095747	1.00828	34.8187	0.334922	58.0312	6	A	M-FA-FA2+H2O-GAL-H(235.082888):MS2,FA(16:0)-H(255.233185):MS2,FA(17:1)-H(267.233251):MS2,FA(17:1)-H [isotope](268.236609):MS2,M-FA1-FA2-H(379.12544):MS2,M-FA1-FA2+H2O-H(397.135251):MS2,M-FA1-FA2+2H2O-H(415.146197):MS2	16.209	1683000	1	0.97	212631	SI	212600	0	0	16.209_212631.670_15.986_16.421_1682684.397_0.97_212630.67_16.027_0.000_16.404_0.000
10_BL0902 (#5, 9/21/17)	1322	DGDG(16:0_17:4)+HCOO	DGDG	(16:0_17:4)	M+HCOO	C49 H83 O17	943.565	12.0515	158067	158067	158067	N	1	MS2	943.564	943.564	0.00098147	1.04017	29.0134	0.190673	58.0267	5	A	M-FA-FA2+H2O-GAL-H(235.083131):MS2,FA(16:0)-H(255.233173):MS2,FA(17:4)-H(261.186173):MS2,FA(17:4)-H [isotope](262.1882):MS2,M-FA1-FA2+H2O-H(397.1353):MS2,M-FA1-FA2+2H2O-H(415.145843):MS2	12.1	1818000	1	0.76	212482	SI	212500	0	0	12.100_212483.100_11.743_12.252_1818452.071_0.76_212482.10_11.743_0.000_12.244_0.000
10_BL0902 (#5, 9/21/17)	2603	DGDG(16:0_18:0)+HCOO	DGDG	(16:0_18:0)	M+HCOO	C50 H93 O17	965.643	18.9108	184378	184378	184378	N	1	MS2	965.642	965.642	0.00089047	0.922153	38.1875	0.910923	63.6458	6	A	M-FA-FA2+H2O-GAL-H(235.081873):MS2,FA(16:0)-H(255.23302):MS2,FA(16:0)-H [isotope](256.23598):MS2,FA(18:0)-H(283.264231):MS2,FA(18:0)-H [isotope](284.267271):MS2,M-FA1-FA2-H(379.125822):MS2,M-FA1-FA2+H2O-H(397.135162):MS2,M-FA1-FA2+H2O-H [isotope](398.138267):MS2,M-FA1-FA2+2H2O-H(415.145756):MS2	18.961	2309000	1	0.98	399739	SI	399700	0	0	18.961_399740.156_18.809_19.119_2308855.927_0.98_399739.16_18.824_0.000_19.100_0.000
10_BL0902 (#5, 9/21/17)	2272	DGDG(16:0_18:1)+HCOO	DGDG	(16:0_18:1)	M+HCOO	C50 H91 O17	963.627	17.1477	1.23689e+06	1.23689e+06	1.23689e+06	N	1	MS2	963.627	963.626	0.00106447	1.10465	39.0638	0.473491	65.1063	6	A	M-FA-FA2+H2O-GAL-H(235.082049):MS2,FA(16:0)-H(255.232813):MS2,FA(16:0)-H [isotope](256.236277):MS2,FA(18:1)-H(281.248511):MS2,FA(18:1)-H [isotope](282.252218):MS2,M-FA1-FA2-H(379.124611):MS2,M-FA1-FA2+H2O-H(397.134979):MS2,M-FA1-FA2+H2O-H [isotope](398.138508):MS2,M-FA1-FA2+2H2O-H(415.145895):MS2	17.175	13770000	1	0.95	1.7068e+06	SI	1707000	0	0	17.175_1706805.911_16.940_17.414_13765217.336_0.95_1706804.91_16.940_0.000_17.328_0.000
10_BL0902 (#5, 9/21/17)	2056	DGDG(16:0_18:2)+HCOO	DGDG	(16:0_18:2)	M+HCOO	C50 H89 O17	961.611	16.0309	1.10123e+06	1.10123e+06	1.10123e+06	N	1	MS2	961.611	961.611	0.00080347	0.835546	41.5682	0.333297	69.2803	6	A	M-FA-FA2+H2O-GAL-H(235.082033):MS2,FA(16:0)-H(255.232835):MS2,FA(16:0)-H [isotope](256.236229):MS2,FA(18:2)-H(279.232933):MS2,FA(18:2)-H [isotope](280.236089):MS2,M-FA1-FA2-H(379.124712):MS2,M-FA1-FA2+H2O-H(397.135293):MS2,M-FA1-FA2+H2O-H [isotope](398.13794):MS2,M-FA1-FA2+2H2O-H(415.145675):MS2	16.021	8151000	1	0.99	1175.37	SI	1226000	0	0	16.021_1226220.325_15.868_16.216_8150658.282_0.99_1175.37_15.868_1042.374_16.205_1042.374
10_BL0902 (#5, 9/21/17)	1686	DGDG(16:0_18:3)+HCOO	DGDG	(16:0_18:3)	M+HCOO	C50 H87 O17	959.596	14.21	3.17101e+06	3.17101e+06	3.17101e+06	N	1	MS2	959.595	959.595	0.00086347	0.899827	38.4371	0.564369	64.0619	6	A	M-FA-FA2+H2O-GAL-H(235.08187):MS2,FA(16:0)-H(255.232722):MS2,FA(16:0)-H [isotope](256.235996):MS2,FA(18:3)-H(277.217135):MS2,FA(18:3)-H [isotope](278.220511):MS2,M-FA1-FA2-H(379.124577):MS2,M-FA1-FA2+H2O-H(397.134931):MS2,M-FA1-FA2+H2O-H [isotope](398.138828):MS2,M-FA1-FA2+2H2O-H(415.145796):MS2,M-FA1-FA2+2H2O-H [isotope](416.148417):MS2	14.248	34290000	0.95	0.95	863.43	BS	3760000	0.079	0.064	14.248_3760098.342_0.079_0.064_34288148.586_0.95_863.43_14.021_14.373;14.476_1358035.790_0.082_0.086_14563617.093_0.92_47.84_14.373_14.698
10_BL0902 (#5, 9/21/17)	1495	DGDG(16:0_18:4)+HCOO	DGDG	(16:0_18:4)	M+HCOO	C50 H85 O17	957.58	13.1059	11107185	11107185	11107185	N	1	MS2	957.579	957.579	0.00067947	0.70957	37.5493	0.0515994	62.5821	6	A	M-FA-FA2+H2O-GAL-H(235.082001):MS2,FA(16:0)-H(255.232935):MS2,FA(16:0)-H [isotope](256.236175):MS2,FA(18:4)-H(275.201561):MS2,FA(18:4)-H [isotope](276.204905):MS2,M-FA1-FA2-H(379.124423):MS2,M-FA1-FA2+H2O-H(397.135125):MS2,M-FA1-FA2+H2O-H [isotope](398.138493):MS2,M-FA1-FA2+2H2O-H(415.145417):MS2	13.105	139700000	0.81	0.9	347.16	BS	11360000	0.122	0.071	12.311_143268.388_0.112_0.109_2019702.847_0.75_18.03_12.130_12.408;13.105_11358016.271_0.122_0.071_139746010.260_0.90_347.16_12.854_13.460
10_BL0902 (#5, 9/21/17)	1487	DGDG(16:0_18:4)-H	DGDG	(16:0_18:4)	M-H	C49 H83 O15	911.573	13.0675	181639	181639	181639	N	1	MS2	911.573	911.574	-0.00030553	-0.335168	36.6546	0.0132204	61.091	6	A	M-FA-FA2+H2O-GAL-H(235.082033):MS2,FA(16:0)-H(255.23304):MS2,FA(16:0)-H [isotope](256.236319):MS2,FA(18:4)-H(275.201618):MS2,FA(18:4)-H [isotope](276.205023):MS2,M-FA1-FA2-H(379.124654):MS2,M-FA1-FA2+H2O-H(397.134662):MS2,M-FA1-FA2+H2O-H [isotope](398.138338):MS2,M-FA1-FA2+2H2O-H(415.145822):MS2	13.094	1577000	1	0.95	191159	SI	191200	0	0	13.094_191160.469_12.897_13.254_1577079.482_0.95_191159.47_12.897_0.000_13.248_0.000
10_BL0902 (#5, 9/21/17)	1831	DGDG(16:0_20:4)+HCOO	DGDG	(16:0_20:4)	M+HCOO	C52 H89 O17	985.611	14.827	1318025	1318025	1318025	N	1	MS2	985.611	985.611	0.00080247	0.814185	40.0583	0.429601	66.7639	6	A	M-FA-FA2+H2O-GAL-H(235.081849):MS2,FA(16:0)-H(255.232672):MS2,FA(16:0)-H [isotope](256.235988):MS2,FA(20:4)-H(303.232691):MS2,FA(20:4)-H [isotope](304.236067):MS2,M-FA1-FA2-H(379.124823):MS2,M-FA1-FA2+H2O-H(397.135004):MS2,M-FA1-FA2+H2O-H [isotope](398.138634):MS2,M-FA1-FA2+2H2O-H(415.145879):MS2	14.827	9833000	1	0.98	1.3273e+06	SI	1327000	0	0	14.827_1327300.205_14.627_15.064_9833439.349_0.98_1327299.21_14.627_0.000_15.057_0.000
10_BL0902 (#5, 9/21/17)	1356	DGDG(16:1_18:3)+HCOO	DGDG	(16:1_18:3)	M+HCOO	C50 H85 O17	957.58	12.32	191261	191261	191261	N	1	MS2	957.58	957.579	0.00108447	1.13251	34.4259	0.734258	57.3765	6	A	M-FA-FA2+H2O-GAL-H(235.081654):MS2,FA(16:1)-H(253.217327):MS2,FA(18:3)-H(277.217835):MS2,M-FA1-FA2-H(379.125705):MS2,M-FA1-FA2+H2O-H(397.134445):MS2,M-FA1-FA2+2H2O-H(415.144778):MS2	12.311	2020000	0.81	0.75	18.03	BS	143300	0.112	0.109	12.311_143268.388_0.112_0.109_2019702.847_0.75_18.03_12.130_12.408;13.105_11358016.271_0.122_0.071_139746010.260_0.90_347.16_12.854_13.460
10_BL0902 (#5, 9/21/17)	1175	DGDG(16:1_18:4)+HCOO	DGDG	(16:1_18:4)	M+HCOO	C50 H83 O17	955.564	11.1204	1.031e+06	1.031e+06	1.031e+06	N	1	MS2	955.564	955.564	0.00058047	0.607463	39.1929	0.301185	65.3215	6	A	M-FA-FA2+H2O-GAL-H(235.082102):MS2,FA(16:1)-H(253.217031):MS2,FA(16:1)-H [isotope](254.220849):MS2,FA(18:4)-H(275.201575):MS2,FA(18:4)-H [isotope](276.204989):MS2,M-FA1-FA2-H(379.124282):MS2,M-FA1-FA2+H2O-H(397.134907):MS2,M-FA1-FA2+H2O-H [isotope](398.137421):MS2,M-FA1-FA2+2H2O-H(415.145779):MS2	11.099	10280000	1	0.65	1.06068e+06	SI	1061000	0	0	11.099_1060685.309_10.841_11.250_10278340.574_0.65_1060684.31_10.841_0.000_11.244_0.000
10_BL0902 (#5, 9/21/17)	2477	MGDG(16:0_16:0)+HCOO	MGDG	(16:0_16:0)	M+HCOO	C42 H79 O12	775.559	18.3219	299421	299421	299421	N	1	MS2	775.558	775.558	0.00112247	1.44731	38.0787	1.73385	95.1969	4	A	M-FA1-FA2+H2O-H(235.082178):MS2,M-FA1-FA2+2H2O-H(253.092783):MS2,FA(16:0)-H(255.232752):MS2,FA(16:0)-H [isotope](256.236429):MS2	18.411	11020000	1	0.96	2265.15	SI	1844000	0	0	18.411_1844454.822_18.189_18.643_11021410.032_0.96_2265.15_18.232_813.916_18.635_813.916
10_BL0902 (#5, 9/21/17)	2177	MGDG(16:0_16:1)+HCOO	MGDG	(16:0_16:1)	M+HCOO	C42 H77 O12	773.543	16.6122	2.09219e+06	2.09219e+06	2.09219e+06	N	1	MS2	773.542	773.542	0.00081547	1.0542	27.5615	0.135473	91.8717	3	A	M-FA1-FA2+2H2O-H(253.092865):MS2,FA(16:1)-H(253.217279):MS2,FA(16:1)-H [isotope](254.220883):MS2,FA(16:0)-H(255.232876):MS2,FA(16:0)-H [isotope](256.236641):MS2	16.603	13330000	1	0.96	2.14461e+06	SI	2145000	0	0	16.603_2144608.367_16.436_16.768_13325664.367_0.96_2144607.37_16.436_0.000_16.763_0.000
10_BL0902 (#5, 9/21/17)	1867	MGDG(16:0_16:2)+HCOO	MGDG	(16:0_16:2)	M+HCOO	C42 H75 O12	771.527	15.094	187603	187603	187603	N	1	MS2	771.527	771.526	0.00070347	0.91179	7.84497	0.0113171	39.2248	2	B	FA(16:2)-H(251.201828):MS2,FA(16:0)-H(255.233154):MS2	15.122	1654000	0.92	0.94	266335	BS	234400	0.063	0.047	15.122_234392.558_0.063_0.047_1653602.542_0.94_266334.67_14.873_15.232;15.385_93277.017_0.069_0.069_821279.934_0.93_6.97_15.232_15.471
10_BL0902 (#5, 9/21/17)	2379	MGDG(16:0_17:1)+HCOO	MGDG	(16:0_17:1)	M+HCOO	C43 H79 O12	787.559	17.6197	907356	907356	907356	N	1	MS2	787.559	787.558	0.00139747	1.77443	22.883	0.888233	76.2766	3	A	M-FA1-FA2+2H2O-H(253.093079):MS2,FA(16:0)-H(255.233001):MS2,FA(16:0)-H [isotope](256.237926):MS2,FA(17:1)-H(267.233083):MS2,FA(17:1)-H [isotope](268.236508):MS2	17.582	7032000	1	0.99	1.1765e+06	SI	1176000	0	0	17.582_1176496.096_17.399_17.773_7031958.398_0.99_1176495.10_17.417_0.000_17.767_0.000
10_BL0902 (#5, 9/21/17)	2146	MGDG(16:0_17:2)+HCOO	MGDG	(16:0_17:2)	M+HCOO	C43 H77 O12	785.543	16.4342	421575	421575	421575	N	1	MS2	785.542	785.542	0.00090547	1.15267	12.2868	0.291975	61.4338	2	B	FA(16:0)-H(255.233033):MS2,FA(17:2)-H(265.217452):MS2	16.4	3646000	1	0.99	567725	SI	567700	0	0	16.400_567725.782_16.198_16.582_3646368.749_0.99_567724.78_16.216_0.000_16.548_0.000
10_BL0902 (#5, 9/21/17)	1800	MGDG(16:0_17:3)+HCOO	MGDG	(16:0_17:3)	M+HCOO	C43 H75 O12	783.527	14.6831	290766	290766	290766	N	1	MS2	783.527	783.526	0.00080947	1.03311	10.6514	0.176957	53.2571	2	B	FA(16:0)-H(255.23326):MS2,FA(17:3)-H(263.201753):MS2	14.721	2667000	0.92	0.98	358790	BS	302400	0.069	0.069	14.721_302378.992_0.069_0.069_2667171.619_0.98_358790.43_14.559_14.842;14.517_2657.122_0.017_0.017_5699.335_0.97_9007.03_14.484_14.559;14.940_119950.397_0.058_0.064_934377.492_0.88_135.64_14.842_15.066
10_BL0902 (#5, 9/21/17)	1582	MGDG(16:0_17:4)+HCOO	MGDG	(16:0_17:4)	M+HCOO	C43 H73 O12	781.512	13.5507	767327	767327	767327	N	1	MS2	781.511	781.511	0.00088347	1.13046	23.3006	0.682174	77.6686	3	A	M-FA1-FA2+2H2O-H(253.09259):MS2,FA(16:0)-H(255.232956):MS2,FA(16:0)-H [isotope](256.235563):MS2,FA(17:4)-H(261.186118):MS2	13.56	7412000	1	0.97	924291	SI	924300	0	0	13.560_924292.387_13.195_13.858_7411512.297_0.97_924291.39_13.226_0.000_13.847_0.000
10_BL0902 (#5, 9/21/17)	2515	MGDG(16:0_18:1)+HCOO	MGDG	(16:0_18:1)	M+HCOO	C44 H81 O12	801.574	18.4694	2.56354e+06	2.56354e+06	2.56354e+06	N	1	MS2	801.574	801.573	0.00085347	1.06474	36.4724	1.55029	91.1811	4	A	M-FA1-FA2+H2O-H(235.082028):MS2,M-FA1-FA2+2H2O-H(253.092539):MS2,FA(16:0)-H(255.232633):MS2,FA(16:0)-H [isotope](256.236475):MS2,FA(18:1)-H(281.248228):MS2,FA(18:1)-H [isotope](282.251465):MS2	18.49	29030000	1	0.97	54997.9	SI	3308000	0	0	18.490_3307759.334_18.265_18.726_29028038.205_0.97_54997.89_18.287_60.142_18.719_60.142
10_BL0902 (#5, 9/21/17)	2326	MGDG(16:0_18:2)+HCOO	MGDG	(16:0_18:2)	M+HCOO	C44 H79 O12	799.558	17.3745	4.77147e+06	4.77147e+06	4.77147e+06	N	1	MS2	799.558	799.558	0.00056547	0.707228	28.5166	1.06632	95.0553	3	A	M-FA1-FA2+2H2O-H(253.09292):MS2,FA(16:0)-H(255.232998):MS2,FA(16:0)-H [isotope](256.236527):MS2,FA(18:2)-H(279.232997):MS2,FA(18:2)-H [isotope](280.236611):MS2	17.395	28270000	1	0.96	165.17	SI	5104000	0	0	17.395_5104200.131_17.236_17.567_28267757.299_0.96_165.17_17.236_30716.903_17.562_30716.903
10_BL0902 (#5, 9/21/17)	2035	MGDG(16:0_18:3)+HCOO	MGDG	(16:0_18:3)	M+HCOO	C44 H77 O12	797.543	15.9205	3658937	3658937	3658937	N	1	MS2	797.542	797.542	0.00098447	1.23438	36.6581	0.540919	91.6452	4	A	M-FA1-FA2+H2O-H(235.081952):MS2,M-FA1-FA2+2H2O-H(253.092944):MS2,FA(16:0)-H(255.23297):MS2,FA(16:0)-H [isotope](256.236586):MS2,FA(18:3)-H(277.217457):MS2,FA(18:3)-H [isotope](278.220592):MS2	15.908	26050000	0.97	0.89	99.05	BS	3305000	0.071	0.053	15.693_1838912.156_0.077_0.073_17572716.745_0.96_553.28_15.409_15.778;15.908_3304898.440_0.071_0.053_26049261.652_0.89_99.05_15.778_16.118
10_BL0902 (#5, 9/21/17)	1769	MGDG(16:0_18:4)+HCOO	MGDG	(16:0_18:4)	M+HCOO	C44 H75 O12	795.527	14.5618	26347386	26347386	26347386	N	1	MS2	795.526	795.526	0.00053647	0.674359	35.2046	0.828778	88.0115	4	A	M-FA1-FA2+H2O-H(235.08173):MS2,M-FA1-FA2+2H2O-H(253.092602):MS2,FA(16:0)-H(255.233023):MS2,FA(16:0)-H [isotope](256.236074):MS2,FA(18:4)-H(275.201676):MS2,FA(18:4)-H [isotope](276.204668):MS2	14.541	203500000	0.96	0.99	1181.05	BS	24390000	0.068	0.063	13.980_140945.027_0.084_0.084_1505296.821_0.92_11.22_13.634_14.145;14.541_24387048.254_0.068_0.063_203530187.504_0.99_1181.05_14.296_14.923
10_BL0902 (#5, 9/21/17)	2707	MGDG(16:0_19:1)+HCOO	MGDG	(16:0_19:1)	M+HCOO	C45 H83 O12	815.59	19.4053	181311	181311	181311	N	1	MS2	815.59	815.589	0.00128747	1.57858	9.20298	0.600427	46.0149	2	B	FA(16:0)-H(255.23293):MS2,FA(19:1)-H(295.264113):MS2	19.445	1995000	1	0.82	286763	SI	286800	0	0	19.445_286763.545_19.192_19.614_1994946.744_0.82_286762.54_19.212_0.339_19.608_0.339
10_BL0902 (#5, 9/21/17)	2178	MGDG(16:0_19:3)+HCOO	MGDG	(16:0_19:3)	M+HCOO	C45 H79 O12	811.558	16.6153	163730	163730	163730	N	1	MS2	811.558	811.558	0.00063747	0.785489	8.14442	0.379237	40.7221	2	B	FA(16:0)-H(255.232932):MS2,FA(19:3)-H(291.233138):MS2	16.61	945900	0.88	0.94	167248	BS	145200	0.046	0.057	16.610_145197.674_0.046_0.057_945877.335_0.94_167247.87_16.424_16.823;16.891_19473.809_0.129_0.155_352869.238_0.37_26854.97_16.823_17.018
10_BL0902 (#5, 9/21/17)	2361	MGDG(16:0_20:3)+HCOO	MGDG	(16:0_20:3)	M+HCOO	C46 H81 O12	825.574	17.5355	345792	345792	345792	N	1	MS2	825.574	825.573	0.00094847	1.14886	18.2714	0.947466	60.9048	3	A	M-FA1-FA2+2H2O-H(253.092989):MS2,FA(16:0)-H(255.232875):MS2,FA(20:3)-H(305.248708):MS2	17.504	3170000	1	0.98	500843	SI	500800	0	0	17.504_500844.368_17.316_17.758_3170261.079_0.98_500843.37_17.316_0.000_17.741_0.000
10_BL0902 (#5, 9/21/17)	2095	MGDG(16:0_20:4)+HCOO	MGDG	(16:0_20:4)	M+HCOO	C46 H79 O12	823.559	16.2082	2.99856e+06	2.99856e+06	2.99856e+06	N	1	MS2	823.558	823.558	0.00123947	1.50502	38.158	0.539508	95.3949	4	A	M-FA1-FA2+H2O-H(235.082501):MS2,M-FA1-FA2+2H2O-H(253.093022):MS2,FA(16:0)-H(255.232829):MS2,FA(16:0)-H [isotope](256.236374):MS2,FA(20:4)-H(303.232971):MS2,FA(20:4)-H [isotope](304.236143):MS2	16.223	24090000	1	0.98	541.04	SI	3714000	0	0	16.223_3713678.484_16.042_16.484_24093439.120_0.98_541.04_16.042_6851.346_16.477_6851.346
10_BL0902 (#5, 9/21/17)	1898	MGDG(16:0_20:5)+HCOO	MGDG	(16:0_20:5)	M+HCOO	C46 H77 O12	821.543	15.2549	200352	200352	200352	N	1	MS2	821.542	821.542	0.00078247	0.95244	8.66067	0.149582	43.3034	2	B	FA(16:0)-H(255.232665):MS2,FA(20:5)-H(301.217164):MS2	15.305	2664000	1	0.79	357893	SI	357900	0	0	15.305_357894.130_15.074_15.373_2664406.557_0.79_357893.13_15.074_0.000_15.373_0.000;15.531_967812.850_15.373_15.698_7863728.061_0.82_277.45_15.373_3475.721_15.688_3475.721
10_BL0902 (#5, 9/21/17)	1968	MGDG(16:1_18:2)+HCOO	MGDG	(16:1_18:2)	M+HCOO	C44 H77 O12	797.543	15.5685	194088	194088	194088	N	1	MS2	797.543	797.542	0.00124747	1.56414	5.37371	0.188859	26.8686	2	B	FA(16:1)-H(253.216957):MS2,FA(18:2)-H(279.233103):MS2	15.693	17570000	0.97	0.96	553.28	BS	1839000	0.077	0.073	15.693_1838912.156_0.077_0.073_17572716.745_0.96_553.28_15.409_15.778;15.908_3304898.440_0.071_0.053_26049261.652_0.89_99.05_15.778_16.118
10_BL0902 (#5, 9/21/17)	1653	MGDG(16:1_18:3)+HCOO	MGDG	(16:1_18:3)	M+HCOO	C44 H75 O12	795.528	13.9982	155724	155724	155724	N	1	MS2	795.527	795.526	0.00112847	1.41852	6.93373	0.265155	34.6687	2	B	FA(16:1)-H(253.217269):MS2,FA(18:3)-H(277.217402):MS2	13.98	1505000	0.96	0.92	11.22	BS	140900	0.084	0.084	13.980_140945.027_0.084_0.084_1505296.821_0.92_11.22_13.634_14.145;14.541_24387048.254_0.068_0.063_203530187.504_0.99_1181.05_14.296_14.923
10_BL0902 (#5, 9/21/17)	1384	MGDG(16:1_18:4)+HCOO	MGDG	(16:1_18:4)	M+HCOO	C44 H73 O12	793.511	12.4995	1.18212e+06	1.18212e+06	1.18212e+06	N	1	MS2	793.511	793.511	0.00073447	0.925595	32.9562	0.0397068	82.3906	4	A	M-FA1-FA2+H2O-H(235.083186):MS2,M-FA1-FA2+2H2O-H(253.092812):MS2,FA(16:1)-H(253.217428):MS2,FA(16:1)-H [isotope](254.221182):MS2,FA(18:4)-H(275.201796):MS2,FA(18:4)-H [isotope](276.205203):MS2	12.529	13790000	0.9	0.96	1.71417e+06	BS	1494000	0.082	0.062	12.529_1494041.833_0.082_0.062_13785246.620_0.96_1714173.73_12.282_12.713;12.784_158941.989_0.157_0.158_3191150.258_0.41_0.23_12.713_12.826;13.483_507490.263_0.110_0.104_6923449.560_0.67_54.33_13.179_13.589
10_BL0902 (#5, 9/21/17)	1826	MGDG(18:1_18:4)+HCOO	MGDG	(18:1_18:4)	M+HCOO	C46 H77 O12	821.543	14.8056	201375	201375	201375	N	1	MS2	821.542	821.542	0.00072347	0.880624	8.43423	0.299717	42.1712	2	B	FA(18:4)-H(275.201201):MS2,FA(18:1)-H(281.248897):MS2	14.757	2550000	1	0.99	240046	SI	240000	0	0	14.757_240046.550_14.525_15.017_2550473.176_0.99_240045.55_14.525_0.000_14.993_0.000
10_BL0902 (#5, 9/21/17)	1257	MGDG(18:3_18:4)+HCOO	MGDG	(18:3_18:4)	M+HCOO	C46 H73 O12	817.512	11.5423	267922	267922	267922	N	1	MS2	817.511	817.511	0.00082147	1.00484	16.4828	0.141048	54.9428	3	A	M-FA1-FA2+2H2O-H(253.092905):MS2,FA(18:4)-H(275.201667):MS2,FA(18:3)-H(277.217417):MS2	11.567	2940000	1	0.68	307936	SI	307900	0	0	11.567_307937.368_11.308_11.679_2940260.488_0.68_307936.37_11.308_0.000_11.679_0.000;11.820_149885.546_11.679_12.023_1354461.015_0.62_48.63_11.679_3019.847_12.011_3019.847
10_BL0902 (#5, 9/21/17)	1103	MGDG(18:4_18:4)+HCOO	MGDG	(18:4_18:4)	M+HCOO	C46 H71 O12	815.496	10.368	796016	796016	796016	N	1	MS2	815.495	815.495	0.00087047	1.06741	22.6314	0.334017	75.4381	3	A	M-FA1-FA2+2H2O-H(253.09261):MS2,FA(18:4)-H(275.201849):MS2,FA(18:4)-H [isotope](276.204973):MS2	10.335	9421000	1	0.48	978316	SI	978300	0	0	10.335_978317.152_10.059_10.486_9420892.447_0.48_978316.15_10.086_0.000_10.479_0.000
10_BL0902 (#5, 9/21/17)	1332	MGDG(18:4_20:4)+HCOO	MGDG	(18:4_20:4)	M+HCOO	C48 H75 O12	843.527	12.1286	164458	164458	164458	N	1	MS2	843.527	843.526	0.00087247	1.03431	10.8294	0.331174	54.1469	2	B	FA(18:4)-H(275.20164):MS2,FA(20:4)-H(303.232759):MS2	12.203	2288000	1	0.88	313204	SI	313200	0	0	12.203_313204.765_11.984_12.359_2287670.535_0.88_313203.77_11.984_0.000_12.353_0.000
10_BL0902 (#5, 9/21/17)	2670	SQDG(17:5_23:2)+HCOO	SQDG	(17:5_23:2)	M+HCOO	C50 H81 O14 S1	937.535	19.2519	35420532	35420532	35420532	N	1	MS2	937.534	937.535	-0.00073253	-0.781337	8.50475	2.50422	42.5237	2	B	SQMG(17:5)-H2O-H(541.210442):MS2,SQMG(17:5)-H2O-H [isotope](542.212892):MS2,M-H(891.528985):MS2,M-H [isotope](892.530259):MS2,M+HCOO(937.5346):MS2	19.263	209800000	1	0.99	1938.36	SI	37940000	0	0	19.263_37939770.572_19.079_19.589_209768034.554_0.99_1938.36_19.103_19563.026_19.436_19563.026
